# Supplementary material for: Body mass index, waist circumference and pre-frailty/frailty: the Tromsø study 1994−2016
Source: PubMed Central journal article supplement — BMJ Open. 2023 Jan 4;13(2):e065707. doi: 10.1136/bmjopen-2022-065707 (PMC9896186; doi:10.1136/bmjopen-2022-065707), 2023-01-04
Supplement: bmjopen-2022-065707.draft_revisions.pdf [file bmjopen-2022-065707.draft_revisions.pdf]

# BMJ Open

BMJ Open is committed to open peer review. As part of this commitment we make the peer review history of every article we publish publicly available.

When an article is published we post the peer reviewers' comments and the authors' responses online. We also post the versions of the paper that were used during peer review. These are the versions that the peer review comments apply to.

The versions of the paper that follow are the versions that were submitted during the peer review process. They are not the versions of record or the final published versions. They should not be cited or distributed as the published version of this manuscript.

BMJ Open is an open access journal and the full, final, typeset and author-corrected version of record of the manuscript is available on our site with no access controls, subscription charges or pay-per-view fees (<http://bmjopen.bmj.com>).

If you have any questions on BMJ Open's open peer review process please email [info.bmjopen@bmj.com](mailto:info.bmjopen@bmj.com)

# BMJ Open

## Body mass index and waist circumference as predictors of pre-frailty/frailty among older adults: A prospective cohort study

|                               |                                                                                                                                                                                                                                                                                              |
|-------------------------------|----------------------------------------------------------------------------------------------------------------------------------------------------------------------------------------------------------------------------------------------------------------------------------------------|
| Journal:                      | <i>BMJ Open</i>                                                                                                                                                                                                                                                                              |
| Manuscript ID                 | bmjopen-2022-065707                                                                                                                                                                                                                                                                          |
| Article Type:                 | Original research                                                                                                                                                                                                                                                                            |
| Date Submitted by the Author: | 14-Jun-2022                                                                                                                                                                                                                                                                                  |
| Complete List of Authors:     | Uchai, Shreeshti; University of Oslo, Department of Nutrition<br>Andersen, Lene; University of Oslo, Department of Nutrition<br>Hopstock, Laila ; UiT The Arctic University of Norway, Department of<br>Community Medicine<br>Hjartaker, Anette; University of Oslo, Department of Nutrition |
| Keywords:                     | NUTRITION & DIETETICS, PUBLIC HEALTH, EPIDEMIOLOGY                                                                                                                                                                                                                                           |
|                               |                                                                                                                                                                                                                                                                                              |

SCHOLARONE™  
Manuscripts

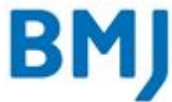

I, the Submitting Author has the right to grant and does grant on behalf of all authors of the Work (as defined in the below author licence), an exclusive licence and/or a non-exclusive licence for contributions from authors who are: i) UK Crown employees; ii) where BMJ has agreed a CC-BY licence shall apply, and/or iii) in accordance with the terms applicable for US Federal Government officers or employees acting as part of their official duties; on a worldwide, perpetual, irrevocable, royalty-free basis to BMJ Publishing Group Ltd ("BMJ") its licensees and where the relevant Journal is co-owned by BMJ to the co-owners of the Journal, to publish the Work in this journal and any other BMJ products and to exploit all rights, as set out in our [licence](#).

The Submitting Author accepts and understands that any supply made under these terms is made by BMJ to the Submitting Author unless you are acting as an employee on behalf of your employer or a postgraduate student of an affiliated institution which is paying any applicable article publishing charge ("APC") for Open Access articles. Where the Submitting Author wishes to make the Work available on an Open Access basis (and intends to pay the relevant APC), the terms of reuse of such Open Access shall be governed by a Creative Commons licence – details of these licences and which [Creative Commons](#) licence will apply to this Work are set out in our licence referred to above.

Other than as permitted in any relevant BMJ Author's Self Archiving Policies, I confirm this Work has not been accepted for publication elsewhere, is not being considered for publication elsewhere and does not duplicate material already published. I confirm all authors consent to publication of this Work and authorise the granting of this licence.

1  
2  
3 **Body mass index and waist circumference as predictors of pre-frailty/frailty**  
4 **among older adults: A prospective cohort study**  
5  
6  
7

8  
9 Shreeshti Uchai<sup>1</sup>, Lene Frost Andersen<sup>1</sup>, Laila Arnesdatter Hopstock<sup>2</sup>, and Anette Hjartåker<sup>1</sup>  
10

11 <sup>1</sup>Department of Nutrition, Institute of Basic Medical Sciences, University of Oslo, Norway

12 <sup>2</sup>Department of Community Medicine, UiT The Arctic University of Norway, Tromsø, Norway  
13  
14  
15  
16  
17  
18

19 **Correspondence to:** Shreeshti Uchai, Department of Nutrition, Institute of Basic Medical Sciences, University of Oslo, Norway,  
20 Postbox: 1046, Blindern, 0317 Oslo, [shreeshti.uchai@medisin.uio.no](mailto:shreeshti.uchai@medisin.uio.no)  
21  
22  
23  
24  
25  
26  
27  
28

29 Word count: 4030  
30  
31  
32  
33  
34  
35  
36  
37  
38  
39  
40  
41  
42  
43  
44  
45  
46  
47  
48  
49  
50  
51  
52  
53  
54  
55

56 **Keywords:** body mass index, frailty, obesity, pre-frailty, waist circumference  
57  
58  
59  
60

## Abstract

**Objective:** To explore the impact of body mass index (BMI) and waist circumference (WC), separately and concurrently, on the risk of pre-frailty/frailty among older adults during 21 years of follow-up.

**Design:** Prospective cohort study.

**Setting:** Population-based study among community-dwelling older adults in Tromsø municipality, Norway.

**Participants:** 2340 women and 2169 men aged  $\geq 45$  years attending the Tromsø Study in 1994–1995 (Tromsø4) and 2015–2016 (Tromsø7), with additional BMI and WC measurements in 2001 (Tromsø5) and 2007–2008 (Tromsø6).

**Primary outcome measures:** Modified Fried's frailty criteria were used to assess frailty status in Tromsø7. BMI and WC trajectories were identified using group-based trajectory modelling. Multivariable logistic regression was used to assess the effect of BMI and WC on frailty status over time.

**Results:** Participants with baseline obesity (adjusted odds ratio [OR] 2.41, 95% confidence interval [CI] 1.93–3.02) or overweight (OR 1.19, 95% CI 1.02–1.39) were more likely to be pre-frail/frail than those with normal BMI. Participants with high (OR 2.14, 95% CI 1.59–2.87) or moderately high (OR 1.57, 95% CI 1.21–2.03) baseline WC were more likely to be pre-frail/frail than those with normal WC. Those at baseline with normal BMI but moderately high/high WC or overweight with normal WC had no significantly increased odds for pre-frailty/frailty. However, those with both obesity and moderately high/high WC had increased odds of pre-frailty/frailty. Higher odds of pre-frailty/frailty was observed among those in "overweight to obesity" or "increasing obesity" trajectories than those with stable normal BMI. Compared with participants in a stable normal WC trajectory, those with high WC throughout follow-up were more likely to be pre-frail/frail.

**Conclusion:** Both general and abdominal obesity, especially over time during adulthood, is associated with an increased risk of pre-frailty/frailty. Thus maintaining normal BMI and WC throughout the life course is important.

### Strengths and limitations of this study:

1. This study is a prospective cohort study with a follow-up period of 21 years.
2. This study takes into account changes in body mass index (BMI) and waist circumference (WC) through the follow-up period using repeated measures.
3. Frailty status was defined using a modified version of Fried's physical frailty criteria.
4. Frailty and pre-frailty were combined as one outcome.
5. Frailty could not be assessed at baseline.

## Background

Frailty is a dynamic multifactorial geriatric syndrome characterised by physiological deterioration, increased vulnerability and decreased resilience toward external stressors.[1,2] Frailty is associated with an increased risk of adverse events such as falls, disability, hospitalisation, reduced quality of life, and mortality.[1,2] It is preceded by pre-frailty, a multi-dimensional, transitional risk state.[3,4] Fried's frailty phenotype identifies pre-frailty as the presence of one or two and frailty as three or more of the five criteria: unintentional weight loss, self-reported exhaustion, weakness, slow walking speed, and low physical activity.[5]

Rapid population ageing has become a global phenomenon.[6] Ageing is typically associated with changes in body composition, such as decreased muscle mass and redistribution of total and regional fat.[7–9] Underweight older adults with minimal reserve capacity are at risk of adverse health outcomes[5,10], and unintentional weight loss is commonly acknowledged as a significant frailty indicator.[5] However, a growing body of evidence also suggests a positive association between obesity among older adults and the risk of frailty.[9,11–15] Obesity aggravates the age-related decline in muscle strength, aerobic capacity, and physical functionality, thus worsening health and well-being.[9,10,13,16,17] It is also closely associated with metabolic disorders, inflammaging and oxidative stress, all of which have been suggested to contribute to the risk of frailty.[13,18]

Body mass index (BMI) and waist circumference (WC) are simple and widely used anthropometric measures. BMI indicates general obesity, while WC indicates abdominal obesity. When used together, both measures could effectively assess obesity-related risks at the population level. [19–21] Some studies have detected a U-shaped association between BMI and frailty.[12,14,22] Midlife overweight and obesity, defined by BMI, have been associated with the risk of pre-frailty and frailty in older age.[23,24] Similarly, a positive association between high WC and frailty among older adults has been observed in some studies.[8,15,25–27] These findings are even more relevant in the present context, where obesity prevalence is increasing across all age groups, posing a global public health challenge.[28]

Though the evidence is expanding, there have been limited longitudinal studies exploring and comparing the relationship of BMI and WC with the risk of developing pre-frailty and frailty over a long follow-up period.[27] Few have explored changes in BMI[29,30] and its association with frailty, while studies that consider changes in WC in association with the development of frailty seem to be lacking. Therefore, the present study aimed to investigate the impact of BMI and WC, separately and concurrently, on the risk of pre-frailty/frailty after 21 years of follow-up. Additionally, the present study assessed changes in BMI and WC through the follow-up period and their effect on pre-frailty/frailty.

## Methods

### The Tromsø study

The Tromsø Study is an ongoing population-based study in the Tromsø municipality, Norway, consisting of seven surveys: Tromsø1 (1974), Tromsø2 (1979–1980), Tromsø3 (1986–1987), Tromsø4 (1994–1995), Tromsø5 (2001), Tromsø6 (2007–2008), and Tromsø7 (2015–2016). More than 45,000 women and men have participated in at least one of the surveys.[31] The earlier surveys (Tromsø1-Tromsø3) did not include WC measurements. Therefore, the present study uses data from Tromsø4 (baseline) to Tromsø7 (follow-up). Data collection in Tromsø4–Tromsø7 included Visit 1 (questionnaires, biological sampling, clinical examinations) of the total sample and Visit 2 (additional clinical examinations) of a predefined subsample.[31]

### Study sample

Tromsø4 included 27,158 participants aged 25–97 years (attendance 77%), Tromsø5, 8,130 participants aged 30–89 years (attendance 79%), Tromsø6, 12,984 participants aged 30–87 years (attendance 66%), and Tromsø7, 21,083 participants aged 40–99 years (attendance 65%).[31]

The present study included Tromsø4 participants aged  $\geq 45$  years with valid information on BMI who also attended Tromsø7, i.e., 21 years of follow-up ( $n = 4,809$ ). Participants with missing information on three or more frailty indicators in Tromsø7 were excluded (Figure 1). Our primary analytical sample had 4,509 participants. Out of these, 1,534 participants had information on WC at Tromsø4 (only available among Visit 2 participants), and 1,391 had repeated measurements on both BMI and WC between Tromsø4 and Tromsø7.

### Exposure

Bodyweight in kilograms and height in metres were measured wearing light clothes and no footwear. WC was measured using tape to the nearest centimetre at the umbilical level. All measurements were performed by trained personnel. BMI was calculated as the weight divided by the square of the height ( $\text{kg}/\text{m}^2$ ) and categorised as underweight ( $<18.5 \text{ kg}/\text{m}^2$ ), normal ( $18.5\text{--}24.9 \text{ kg}/\text{m}^2$ ), overweight ( $25.0\text{--}29.9 \text{ kg}/\text{m}^2$ ), and obesity ( $\geq 30.0 \text{ kg}/\text{m}^2$ ) according to the World Health Organization (WHO) criteria.[32] WC was categorised as normal (men  $\leq 94$  cm, women  $\leq 80$  cm), moderately high (men 95–102 cm, women 81–88 cm), and high (men  $>102$  cm, women  $>88$  cm) according to WHO.[33]

## Frailty assessment

A modified version of Fried et al.'s frailty phenotype[5] was used to operationalise frailty in Tromsø7. Frailty was not operationalised at baseline as complete information on frailty indicators was unavailable. Five indicators were assessed at follow-up (Supplementary Table 1):

1. Unintentional weight loss: Self-reported involuntary weight loss during the last six months.[34]
2. Exhaustion: Response "pretty much" or "very much" to the question: "During the last week, have you experienced that everything is a struggle?" from the Hopkins' Symptom Checklist-10.[35]
3. Walking speed: Short Physical Performance Battery test, [36,37] where the fastest time out of two walks was selected and converted to seconds per 15 feet from seconds per 4 meters. Sex- and height-adjusted cut-offs, according to Fried et al.,[5] were used to identify participants with a low walking speed.
4. Weakness: Grip strength was measured using a newly calibrated Jamar+ Digital Dynamometer (Patterson Medical, Warrenville, IL, USA) following the Southampton protocol procedures.[38] Sex- and BMI-specific cut-offs, as suggested by Fried et al.,[5] were used to identify participants with low grip strength.
5. Low physical activity: Response "Reading, watching TV/screen or other sedentary activity" to the question: "Describe your exercise and physical exertion in leisure time over the last year" from the Saltin–Grimby Physical Activity Level Scale for leisure-time physical activity.[39]

Participants were categorised as robust (0), pre-frail (1-2) and frail ( $\geq 3$ ) based on the number of frailty indicators present. The number of participants with frailty was low in the present study ( $< 1.1\%$ ); hence pre-frail and frail individuals were combined to form a common outcome, i.e. pre-frail/frail (frailty score  $\geq 1$ ).

## Covariates

The potential covariates in this study were selected based on the existing knowledge and literature on frailty status. Sociodemographic characteristics included age, sex, educational level [primary/partly secondary education (up to 10 years of schooling), upper secondary education (minimum of 3 years), college/university short ( $< 4$  years), and college/university long ( $\geq 4$  years)], and marital/cohabitation status (married/cohabiting or single/not cohabiting with a partner). Self-reported smoking status was categorised as current, former, or never smoker. Self-reported alcohol intake level was categorised as never-drinker, infrequent drinker ( $< 2$ –4 times/month), and frequent drinker ( $> 2$ –3 times/week). Comorbidity was defined using Charlson's comorbidity index[40] without weighting of the diseases. It was categorised as "no comorbidity" and "comorbidity" based on the self-reported presence of coronary heart disease (angina pectoris/myocardial infarction), stroke, diabetes, cancer, pulmonary disease (asthma/chronic bronchitis/emphysema), and peptic



1  
2  
3 ulcer. Social support was categorised as self-reported "not enough good friends" or "enough good friends."  
4 Self-perceived health status was categorised as "poor" or "good." Baseline physical activity level was  
5 categorised as no/low physical activity (0 hours/week spent in hard physical activity or  $\leq 2$  hours/week spent  
6 in light physical activity) and high physical activity ( $\geq 1$  hour/week in hard physical activity or  $\geq 3$   
7 hours/week in light physical activity).  
8  
9  
10

## 11 Statistical analysis

12  
13  
14 The sociodemographic and lifestyle factors at baseline across robust and pre-frail/frail groups were  
15 described using mean and standard deviation for continuous variables and proportion and count for  
16 categorical variables. The differences between the two groups were tested using the student's *t*-test for  
17 continuous variables and the chi-square test for categorical variables.  
18  
19  
20

21 Multivariable logistic regression analysis was used to assess the effect of BMI and WC on pre-frailty/frailty  
22 at follow-up. Five different longitudinal associations were assessed: baseline BMI and pre-frailty/frailty;  
23 baseline WC and pre-frailty/frailty; joint BMI and WC profile at baseline and pre-frailty/frailty; BMI  
24 trajectories and pre-frailty/frailty; WC trajectories and pre-frailty/frailty. The models were minimally  
25 adjusted for age and sex (Model 1) and further adjusted for educational level, marital/cohabitation status,  
26 smoking status, alcohol intake, social support, self-perceived health, and physical activity level at baseline  
27 (Model 2). The adjustment variables were selected using a stepwise backward regression procedure. No  
28 significant collinearity or interaction was detected between covariates in the model.  
29  
30  
31  
32  
33  
34

35 Group-based trajectory modelling (GBTM) was conducted among 1,391 participants to assess changes in  
36 the BMI and WC throughout the 21-year follow-up period, with four repeated measurements on both BMI  
37 and WC, taken every 6-7 years at Tromsø4, Tromsø5, Tromsø6 and Tromsø7. GBTM, also known as latent  
38 class growth analysis, is a semi-parametric technique that identifies distinct subgroups of individuals  
39 following a similar pattern of change over time on a given variable, using finite mixtures of defined  
40 probability distributions.[41] Different models with varying numbers of trajectory groups, varying  
41 functional forms and orders were compared. The most appropriate model was selected based on the  
42 Bayesian Information Criterion[42] and then introduced into longitudinal multivariable logistic regression  
43 models. The distinct BMI and WC trajectories were named based on their observed pattern. The WC  
44 trajectories were sex-stratified due to varying cut-off levels for men and women.  
45  
46  
47  
48  
49  
50

51 A new variable with five distinct strata (normal BMI and normal WC; normal BMI and moderately  
52 high/high WC; overweight and low WC; overweight and moderately high/high WC; obesity and moderately  
53 high/high WC) was formed by combining different categories of BMI and WC. They were then introduced  
54 into the multivariable models to assess the concurrent effects of BMI and WC on frailty status. While  
55  
56  
57  
58  
59  
60

forming the new joint variable, the underweight group was removed because of low prevalence (<1%), and moderately high and high WC groups were combined because of their low sample size when stratified.

Additional supplementary analyses were carried out. The primary longitudinal analyses were repeated among the subgroup of participants with non-missing information on all five frailty indicators ( $n = 2,864$ ), and cross-sectional analyses were performed to assess the association between BMI and WC level and frailty status at Tromsø7.

All the statistical analyses were conducted using STATA 16.[43] Statistical significance was set at  $P < 0.05$ . The results are expressed as adjusted odds ratios (ORs) with 95% confidence intervals (CIs).

### Patient and public involvement

Patients and the public were not involved in this research's design, conduct, reporting, or dissemination plans.

## Results

### Study population

The mean age at baseline was 51.6 years, and the participants were followed up for 21 years. 28.4% of the participants were pre-frail, 1.1% were frail, and 70.5% were robust at follow-up (Table 1). In total, 50.6% of the robust group and 55.0% of the pre-frail/frail group were women. Most robust and pre-frail/frail participants were either married or cohabiting (84.3% and 80.3%) and reported having enough good friends (83.1% and 80.5%) at baseline. All the baseline characteristics, except comorbidity, were significantly different in the robust and the pre-frail/frail groups (Table 1).

When assessed at follow-up, all the sociodemographic, lifestyle and disease-related factors were significantly associated with pre-frailty/frailty (Supplementary Table 2). When the baseline characteristics of the eligible participants lost to follow-up ( $n = 8,649$ ) were compared with those of the attendees, they were found to be older (mean age 63.2 years) with a less healthy lifestyle and higher comorbidities (Supplementary Table 3).

### BMI and WC

At baseline, the proportion of individuals with underweight was low (<1%) (Table 2). The proportion of individuals with normal BMI was higher among the robust group than the pre-frail/frail group (47.6% versus 39.3%), whereas the proportion of individuals with obesity was higher among the pre-frail/frail group

(17.1% versus 8.4%). The robust group had a higher proportion of individuals with normal WC than the pre-frail/frail group (51.5% versus 37.3%), whereas the pre-frail/frail group had a higher proportion of individuals with high WC (27.7% versus 17.4%). A similar distribution of different BMI and WC categories across robust and pre-frail/frail groups was observed at follow-up (Supplementary Table 2). Both robust and pre-frail/frail groups at follow-up had an increased proportion of individuals with obesity and high WC compared with baseline (Table 2; Supplementary Table 2).

**Table 1 Baseline characteristics of participants by frailty status at follow-up: The Tromsø Study 1994–2016**

|                                             | Frailty status                             |                                                     | <i>P</i> value     |
|---------------------------------------------|--------------------------------------------|-----------------------------------------------------|--------------------|
|                                             | Robust<br>(% ( <i>n</i> ))<br>70.5 (3,179) | Pre-frail/frail<br>(% ( <i>n</i> ))<br>29.5 (1,330) |                    |
| Age in years, mean (SD)                     | 51.1 (5.1)                                 | 52.8 (5.9)                                          | <0.05 <sup>a</sup> |
| Women                                       | 50.6 (1,608)                               | 55.0 (732)                                          | <0.05              |
| <b>Smoking status</b>                       |                                            |                                                     |                    |
| Current smokers                             | 27.0 (858)                                 | 33.7 (448)                                          |                    |
| Former smokers                              | 36.1 (1,149)                               | 34.0 (452)                                          | <0.05              |
| Never                                       | 36.9 (1,172)                               | 32.3 (430)                                          |                    |
| <b>High physical activity level</b>         | 69.5 (2,210)                               | 56.9 (756)                                          | <0.05              |
| <b>Married or cohabiting</b>                | 84.3 (2,679)                               | 80.3 (1,068)                                        | <0.05              |
| <b>Self-perceived health – good</b>         | 75.4 (2,394)                               | 61.5 (818)                                          | <0.05              |
| <b>Social support – enough good friends</b> | 83.1 (2,404)                               | 80.5 (976)                                          | <0.05              |
| <b>Educational level</b>                    |                                            |                                                     |                    |
| Primary/Partly secondary                    | 32.8 (1,041)                               | 42.4 (562)                                          |                    |
| Upper secondary                             | 34.3 (1,085)                               | 34.2 (453)                                          | <0.05              |
| College/University short                    | 16.5 (524)                                 | 12.8 (169)                                          |                    |
| College/University long                     | 16.4 (520)                                 | 10.6 (141)                                          |                    |
| <b>Alcohol intake</b>                       |                                            |                                                     |                    |
| Never/Abstaining                            | 9.0 (286)                                  | 11.9 (158)                                          |                    |
| Infrequent drinker                          | 76.2 (2,419)                               | 76.6 (1,015)                                        | <0.05              |
| Frequent drinker                            | 14.8 (468)                                 | 11.5 (152)                                          |                    |
| <b>Prevalent diseases</b>                   |                                            |                                                     |                    |
| Pulmonary disease <sup>b</sup>              | 8.6 (272)                                  | 9.5 (126)                                           | >0.05              |
| Coronary heart disease <sup>c</sup>         | 2.3 (73)                                   | 4.5 (59)                                            | <0.05              |
| Diabetes                                    | 0.4 (12)                                   | 0.6 (8)                                             | 0.05               |
| Cancer                                      | 2.8 (79)                                   | 3.5 (42)                                            | >0.05              |
| Stroke                                      | 0.6 (19)                                   | 0.8 (11)                                            | >0.05              |
| Peptic ulcer                                | 7.0 (197)                                  | 8.9 (105)                                           | <0.05              |
| <b>Comorbidity</b>                          | 1.9 (59)                                   | 2.7 (36)                                            | >0.05              |

Values are percentages (numbers); *P* value:  $\chi^2$  test for categorical variables; *P* value: <sup>a</sup>Student's *t*-test; <sup>b</sup>including asthma/chronic bronchitis/emphysema; <sup>c</sup>including angina pectoris/myocardial infarction.

When BMI and WC level was assessed jointly at baseline (Table 3), the robust group had a higher proportion of individuals with both BMI and WC in the normal range than the pre-frail/frail group (36.1% versus 29.1%). The proportion of individuals with both obesity and moderately high/ high WC was higher among the pre-frail/frail group (16.9% versus 7.4%).

The GBTM resulted in four distinct trajectories of BMI ( $n = 1391$ ): stable normal BMI (25.8%), stable overweight (44.8%), overweight to obesity (23.9%), and increasing obesity (5.5%) (Supplementary Figure 1). The increasing obesity trajectory included the individuals with BMI  $\geq 30$  kg/m<sup>2</sup> at baseline, which kept increasing to a higher obesity level, i.e., BMI  $\geq 35$  kg/m<sup>2</sup>. Four distinct WC trajectories were identified for both women ( $n = 660$ ) and men ( $n = 731$ ) (Supplementary Figure 2). The WC trajectories for women were: stable normal WC (23.3%), moderately high to high WC (45.8%), gradually increasing high WC (26.6%), and steeply increasing high WC (4.3%). The WC trajectories for men were: stable normal WC (21.0%), stable moderately high WC (39.9%), moderately high to high WC (30.6%), and increasing high WC (8.5%).

### BMI, WC, and pre-frailty/frailty

Individuals who had obesity (OR 2.41, 95% CI 1.93–3.02) or overweight (OR 1.19, 95% CI 1.02–1.39) at baseline had significantly higher odds of becoming pre-frail/frail at follow-up compared with individuals with normal BMI (Model 2, Table 2). No statistically significant association was detected between underweight BMI and the odds of pre-frailty/frailty; however, the number of underweight individuals was insufficient to reach any conclusion. Participants with moderately high WC (OR 1.57, 95% CI 1.21–2.03) or high WC (OR 2.16, 95% CI 1.59–2.87) at baseline had higher odds of becoming pre-frail/frail at follow-up compared to individuals with a normal WC (Model 2, Table 2).

When this analysis was repeated among participants with complete information on all five frailty criteria ( $n = 2,864$ ; Supplementary Table 4), it generated similar results, except for participants with overweight BMI (OR 1.18, 95% CI 0.97–1.43).

The supplementary cross-sectional analysis (Supplementary Table 5) indicated a significant association between obesity and pre-frailty/frailty among older adults (OR 1.88, 95% CI 1.54–2.30), whereas no association was detected between overweight and pre-frailty/frailty. As for WC, only high WC was associated with increased odds of pre-frailty/frailty (OR 1.45, 95% CI 1.20–1.76) in the cross-sectional analysis.

**Table 2 Longitudinal association between BMI and WC, and pre-frailty/frailty: The Tromsø Study 1994–2016**

|                              | Frailty status    |                            |                        |                        |
|------------------------------|-------------------|----------------------------|------------------------|------------------------|
|                              | Robust<br>(% (n)) | Pre-frail/frail<br>(% (n)) | Model 1<br>OR (95% CI) | Model 2<br>OR (95% CI) |
|                              | 70.5 (3179)       | 29.5 (1330)                |                        |                        |
| <b>BMI, kg/m<sup>2</sup></b> |                   |                            |                        |                        |
| Underweight                  | 0.3 (11)          | 0.7 (9)                    | 2.15 (0.88–5.29)       | 1.32 (0.49–3.54)       |
| Normal                       | 47.6 (1,513)      | 39.3 (522)                 | Ref.                   | Ref.                   |
| Overweight                   | 43.7 (1,388)      | 43.0 (572)                 | 1.18 (1.02–1.36)       | 1.19 (1.02–1.39)       |
| Obesity                      | 8.4 (267)         | 17.0 (227)                 | 2.42 (1.98–2.98)       | 2.41 (1.93–3.02)       |
| <b>WC, cm</b>                | $n = 952$         | $n = 582$                  |                        |                        |

|                 |            |            |                   |                   |
|-----------------|------------|------------|-------------------|-------------------|
| Normal          | 51.5 (490) | 37.3 (217) | Ref.              | Ref.              |
| Moderately high | 31.1 (296) | 35.0 (204) | 1.54 (1.21–1.96)* | 1.57 (1.21–2.03)* |
| High            | 17.4 (166) | 27.7 (161) | 2.16 (1.65–2.83)* | 2.14 (1.59–2.87)* |

Model 1: adjusted for age and sex (\*excluding sex) at baseline.

Model 2: adjusted for age, sex, educational level, marital/cohabitation status, smoking status, alcohol intake, social support, self-perceived health, and physical activity level (\*excluding sex) at baseline.

BMI, body mass index; CI, confidence interval; OR: odds ratio; WC, waist circumference.

**BMI categories**

Underweight: <18.5 kg/m<sup>2</sup>

Normal: 18.5–24.9 kg/m<sup>2</sup>

Overweight: 25.0–29.9 kg/m<sup>2</sup>

Obesity: ≥30 kg/m<sup>2</sup>

**WC categories**

Normal: men ≤94 cm; women ≤80 cm

Moderately high: men 95–102 cm; women 81–88 cm

High: men >102 cm; women >88 cm

The longitudinal model that included joint BMI and WC profile at baseline showed that participants who had overweight with moderately high/high WC (OR 1.48, 95% CI 1.11–1.98) or participants who had obesity with moderately high/high WC (OR 3.11, 95% CI 2.07–4.70) had higher odds of being pre-frail/frail compared with participants with normal BMI and normal WC (Model 2, Table 3). No significant association with pre-frailty/frailty was detected among participants who had normal BMI with moderately high/high WC or overweight with normal WC at baseline.

**Table 3 Association between combined BMI and WC profiles, and pre-frailty/frailty: The Tromsø Study 1994–2016**

| Longitudinal                           | Frailty status    |                            | Model 1<br>OR (95% CI) | Model 2<br>OR (95% CI) |
|----------------------------------------|-------------------|----------------------------|------------------------|------------------------|
|                                        | Robust<br>(% (n)) | Pre-frail/frail<br>(% (n)) |                        |                        |
| <b>BMI and WC profile, baseline</b>    | 62.8 (870)        | 37.2 (515)                 |                        |                        |
| Normal BMI and normal WC               | 36.1 (314)        | 29.1 (150)                 | Ref.                   | Ref.                   |
| Normal BMI and moderately high/high WC | 8.4 (73)          | 8.0 (41)                   | 1.13 (0.73–1.74)       | 1.01 (0.63–1.61)       |
| Overweight and normal WC               | 15.9 (139)        | 9.5 (49)                   | 0.74 (0.50–1.08)       | 0.79 (0.53–1.19)       |
| Overweight and moderately high/high WC | 32.2 (280)        | 36.5 (188)                 | 1.40 (1.07–1.84)       | 1.48 (1.11–1.98)       |
| Obesity and moderately high/high WC    | 7.4 (64)          | 16.9 (87)                  | 2.86 (1.96–4.18)       | 3.11 (2.07–4.70)       |

Model 1: adjusted for age at baseline.

Model 2: adjusted for age, educational level, marital/cohabitation status, smoking status, alcohol intake, social support, self-perceived health, and physical activity level at baseline.

BMI, body mass index; CI, confidence interval; OR: odds ratio; WC, waist circumference.

The model with BMI trajectories (Model 2, Table 4) indicated higher odds of pre-frailty/frailty among participants in the overweight to obesity trajectory (OR 1.67, 95% CI 1.19–2.35) or those in the constantly increasing obesity trajectory (OR 3.12, 95% CI 1.80–5.41) compared with those in the stable normal BMI trajectory. In contrast, there was no significant association in the stable overweight category. The model with WC trajectories (Model 2, Table 4) showed that women in the gradually increasing high WC trajectory (OR 2.17, 95% CI 1.32–3.59) or the steeply increasing high WC trajectory (OR 4.09, 95% CI 1.54–10.90) had higher odds of being pre-frail/frail compared with women in the normal WC trajectory. Similarly, men

in the increasing high WC trajectory (OR 3.36, 95% CI 1.71–6.59) had higher odds of pre-frailty/frailty compared with men in the normal WC trajectory.

**Table 4 Association between BMI and WC trajectories and pre-frailty/frailty: The Tromsø study 1994–2016**

|                                | Frailty status    |                            | Model 1           | Model 2            |
|--------------------------------|-------------------|----------------------------|-------------------|--------------------|
|                                | Robust<br>(% (n)) | Pre-frail/frail<br>(% (n)) | OR (95% CI)       | OR (95% CI)        |
| <b>BMI trajectories</b>        | 62.8 (874)        | 37.2 (517)                 |                   |                    |
| Stable normal BMI              | 27.8 (243)        | 22.4 (116)                 | Ref.              | Ref.               |
| Stable overweight              | 46.6 (407)        | 42.4 (219)                 | 1.20 (0.91–1.59)  | 1.21 (0.90–1.62)   |
| Overweight to obese            | 21.8 (191)        | 26.5 (137)                 | 1.62 (1.18–2.22)  | 1.67 (1.19–2.35)   |
| Increasing obesity             | 3.8 (33)          | 8.7 (45)                   | 3.07 (1.85–5.09)  | 3.12 (1.80–5.41)   |
| <b>WC trajectories (women)</b> | 59.4 (392)        | 40.6 (268)                 |                   |                    |
| Stable normal WC               | 26.3 (103)        | 17.5 (47)                  | Ref.              | Ref.               |
| Moderately high to high WC     | 49.7 (195)        | 42.5 (114)                 | 1.27 (0.84–1.94)* | 1.30 (0.83–2.05)*  |
| Gradually increasing high WC   | 20.9 (82)         | 33.6 (90)                  | 2.34 (1.47–3.70)* | 2.17 (1.32–3.59)*  |
| Steeply increasing high WC     | 3.1 (13)          | 6.3 (17)                   | 3.04 (1.34–6.90)* | 4.09 (1.54–10.90)* |
| <b>WC trajectories (men)</b>   | 65.9 (482)        | 34.1 (249)                 |                   |                    |
| Stable normal WC               | 22.4 (108)        | 18.1 (45)                  | Ref.              | Ref.               |
| Stable moderately high WC      | 41.1 (198)        | 38.5 (96)                  | 1.18 (0.77–1.80)* | 1.12 (0.72–1.76)*  |
| Moderately high to high WC     | 31.5 (152)        | 28.9 (72)                  | 1.18 (0.75–1.85)* | 1.12 (0.69–1.79)*  |
| Increasing high WC             | 5.0 (24)          | 14.5 (36)                  | 3.73 (1.99–6.97)* | 3.36 (1.71–6.59)*  |

Model 1: adjusted for age and sex at baseline (\*adjusted for age only).  
 Model 2: adjusted for age, sex, educational level, marital/cohabitation status, smoking status, alcohol intake, social support, self-perceived health, and physical activity level (\*excluding sex) at baseline.  
 BMI, body mass index; CI, confidence interval; OR: odds ratio; WC, waist circumference.

## Discussion

The present study followed 4,509 community-dwelling participants from the population-based Tromsø Study from 1994 to 2016 to examine the association between general and abdominal obesity and the risk of frailty. This study suggests an increased likelihood of pre-frailty/frailty among those with overweight or obesity. Increased likelihood of pre-frailty/frailty was also observed among those with high or moderately high WC at baseline. When assessed jointly, participants with both obesity and moderately high/high WC at baseline had increased odds of being pre-frail/frail compared to those with BMI and WC in the normal range. Participants in the "overweight to obesity" or the "increasing obesity" trajectories had increased odds of pre-frailty/frailty compared with those in the stable normal BMI trajectory. Additionally, participants with a high WC at baseline, whose WC gradually or steeply increased throughout the follow-up period, had increased odds of being pre-frail/frail compared with those in a stable normal WC trajectory.



1  
2  
3 In line with our conclusions, the findings from two previous longitudinal studies with a similar follow-up  
4 period (26 and 22 years) reported a significant positive association between midlife overweight or obesity  
5 and the development of pre-frailty and frailty in later life. [23,24] A prospective study with a follow-up  
6 period of 3.5 years observed a significantly increased risk of frailty among underweight women and women  
7 with overweight and obesity.[22] No significant association between baseline underweight status and the  
8 risk of pre-frailty/frailty was detected in our study. However, the number of underweight individuals in our  
9 study was too low, resulting in a low statistical power to reach any conclusion. When repeating our primary  
10 longitudinal analysis among a subsample of participants using stricter exclusion criteria, i.e. non-missing  
11 information on all five markers of frailty, only participants with obesity at baseline had an increased  
12 likelihood of becoming pre-frail/frail at follow-up.  
13  
14  
15  
16  
17  
18  
19

20 In terms of WC and frailty status, similar to our results, a positive association between higher WC and  
21 frailty among older adults was reported by a 3.5-year follow-up study from two prospective Spanish  
22 cohorts.[27] A positive association between high WC and frailty was observed in a few other  
23 studies;[8,15,25] however, they were cross-sectional and used slightly different cut-offs to categorise WC.  
24  
25  
26

27 We identified BMI and WC trajectories to account for the dynamic change in the adiposity level that might  
28 occur during the life course. In line with our findings regarding BMI trajectories, comparable trajectories  
29 and observations about a higher risk of pre-frailty and frailty among those with increasing BMI were  
30 observed in a 26-year follow-up study.[30] A large study that followed adults aged  $\geq 51$  years for ten years  
31 reported a higher incidence of frailty among weight gain class, weight loss class, and consistent obesity  
32 class.[29] Literature on long-term changes in WC and its association with frailty seems lacking. Few  
33 epidemiological studies have explored the combined effect of BMI and WC on frailty among older adults.  
34 Two studies conducted among adults aged  $\geq 65$  years in Portugal[44] and  $\geq 60$  years in Spain[27] observed  
35 a positive association between frailty and adiposity only when the individuals had both a high WC and a  
36 high BMI. It aligns with our result to a certain extent, as we observed an increased likelihood of pre-  
37 frailty/frailty among individuals with both obesity and moderately high/high WC at baseline. We also  
38 observed higher odds of pre-frailty/frailty among those who had overweight with a moderately high/high  
39 WC at baseline. On the contrary, high WC was reported to be associated with frailty regardless of their BMI  
40 categories by two cross-sectional studies conducted among community-dwelling adults aged  $\geq 65$  years in  
41 China[25] and England,[14] indicating WC to be better linked with frailty. Of note, participants who had  
42 normal BMI with moderately high/high WC or those who had overweight with normal WC did not have  
43 significantly increased odds of pre-frailty/frailty in our study. This finding indicates the importance of  
44 considering both BMI and WC to identify the risk of frailty.  
45  
46  
47  
48  
49  
50  
51  
52  
53  
54  
55  
56  
57  
58  
59  
60

1  
2  
3 There are different mechanisms through which obesity might contribute to pre-frailty/frailty. Increased  
4 adiposity leads to increased secretion of pro-inflammatory adipokines, thus contributing to  
5 inflammation,[13,18] which is also associated with frailty among older adults.[45] Obesity leads to  
6 increased fat mass and increased lipid infiltration in muscle fibres resulting in reduced muscle strength and  
7 function.[13,46] When coupled with an age-related decline in muscle mass and strength, it causes  
8 "sarcopenic obesity", which is linked to an increased risk of frailty and disability.[18,47,48]  
9  
10  
11  
12

13 We used anthropometric measurements (BMI and WC) to define general and abdominal obesity as our  
14 primary exposures. BMI is often criticised for its inability to provide information on fat distribution,[20]  
15 while WC is criticised for its limitation in distinguishing between visceral and subcutaneous fat.[49]  
16 However, they are effective in assessing obesity-related risks at the population level.[19,20] A study among  
17 Tromsø7 participants aged  $\geq 40$  years found a strong correlation between BMI and visceral adipose tissue  
18 (VAT) mass and WC and VAT mass. It also concluded them to be a satisfactory substitute to identify  
19 cardiometabolic risk.[21] Further, they are simple to measure, easy to replicate, and widely used in routine  
20 health assessments, thus, helping identify individuals at risk of frailty to provide timely interventions.  
21  
22  
23  
24  
25

26 The primary strength of this study is its prospective design with a long follow-up period of two decades.  
27 Both BMI and WC were measured objectively. The repeated measures allowed us to account for changes  
28 in BMI and WC through the follow-up period and gain a more comprehensive understanding of the long-  
29 term effects of these exposures on the risk of frailty. We used a slightly modified version of Fried et al.'s  
30 frailty phenotype definition,[5] one of the most commonly used definitions in frailty research.[50] Each  
31 frailty indicator we utilised has been validated in different research contexts.[34–36,39] The main limitation  
32 of our study is the selection bias resulting from differential loss to follow-up. Those lost to follow-up were  
33 comparatively older and had a higher proportion of general and abdominal obesity and other potential risk  
34 factors for frailty (Supplementary Table 3). This might have led to a lower prevalence of frailty in Tromsø7.  
35 However, given the 21 years follow-up period, most of the participants might have been lost to follow-up  
36 because of mortality at an older age. In total, 1.1% of the participants aged  $\geq 66$  years at Tromsø7 were frail,  
37 and 28.4% were pre-frail which is much lower than the pooled prevalence estimates provided by O'Caomh  
38 et al.[51] This result aligns with the findings from a study where the grip strengths of Tromsø7 participants  
39 and Russian Know Your Heart study participants aged 40–69 years were compared. The average Norwegian  
40 participant had a mean grip strength comparable to a seven-year younger Russian counterpart [52]. This  
41 indicates that the nordic population might be comparatively healthier,[53] thus limiting the generalisability  
42 of our findings to other populations across the globe. Only a sub-sample of our study population had  
43 information on both BMI and WC, and an even lower number had repeated measurements available for both  
44 exposures. Therefore, the models including both BMI and WC might have low statistical power, particularly  
45  
46  
47  
48  
49  
50  
51  
52  
53  
54  
55  
56  
57  
58  
59  
60



1  
2  
3 when considering the repeated measures. Information on frailty measures was not available at baseline.  
4 However, most participants were in their mid-life (median age 50) at baseline, lowering their likelihood of  
5 having frailty components. We adjusted for several confounding factors; however, the potential for residual  
6 confounding remains. We could not adjust for inflammatory markers, which is a limitation.  
7  
8

9  
10 We combined pre-frailty and frailty as a single outcome because of the low frailty prevalence in this study.  
11 The pre-frail/frail population in this study is primarily pre-frail. It would have been informative to assess  
12 the risk of the pre-frailty and frailty separately. Nevertheless, understanding factors associated with pre-  
13 frailty is highly relevant because pre-frailty is gaining broader interest as an ideal opportunity for  
14 administering timely intervention to delay or reverse frailty and the associated adverse outcomes.[54] Of  
15 note, as our outcome pre-frailty/frailty is common, the OR estimates obtained might slightly overestimate  
16 the relative risk, and caution should be applied while interpreting it as a risk.  
17  
18

19  
20 In the context where the population is rapidly ageing, and the obesity epidemic is rising, growing evidence  
21 recognises the subgroup of "fat and frail" older individuals in contrast to viewing frailty only as a wasting  
22 disorder.[11,14,24] In our study, individuals with both high BMI and high WC, i.e., general and abdominal  
23 obesity, especially for a long duration throughout their adulthood, were observed to have an increased  
24 likelihood of pre-frailty/frailty. It highlights the importance of routinely assessing and maintaining optimal  
25 BMI and WC throughout adulthood to lower the risk of frailty in older age.  
26  
27  
28  
29  
30  
31  
32  
33  
34  
35  
36  
37  
38  
39  
40  
41  
42  
43  
44  
45  
46  
47  
48  
49  
50  
51  
52  
53  
54  
55  
56  
57  
58  
59  
60

## Funding

This work was supported by the Throne Holst Foundation (Grant number N/A) and the Institute of Basic Medical Sciences, University of Oslo (Grant number N/A). The project also received funding from Aktieselskabet Freia Chocolate Fabriks Medisinske fond (Grant number N/A). The funders had no role in the research manuscript's design, conduct, analysis, interpretation, or drafting.

## Acknowledgements

We thank the NutriFrail team for their support and the Tromsø Study team for their cooperation in data acquisition.

## Competing Interest

None declared.

## Ethical approval

The Tromsø Study was approved by the Regional Committee of Medical and Health Research Ethics (REK) North and the Norwegian Data Protection Authority. Approvals from REK (ref. 2021/234146) and the Norwegian Centre for Research Data (NSD) (ref. 364331) were obtained for this particular study.

## Contributions

SU was responsible for conceptualisation, data acquisition, analysis, interpretation, writing original draft, review and editing; LFA was responsible for conceptualisation, funding acquisition, supervision, writing critical review and editing; LAH was responsible for data acquisition for the Tromsø Study, constant coordination, writing critical review and editing; AH was responsible for conceptualisation, funding acquisition, data acquisition, supervision, writing critical review and editing.

## Data availability statement

Not available

## Patient consent for publication

Not required

## References

- 1 Kojima G, Iliffe S, Jivraj S, et al. Association between frailty and quality of life among community-dwelling older people: a systematic review and meta-analysis. *J Epidemiol Community Health* 2016;70:716–21. doi:10.1136/jech-2015-206717
- 2 Conroy S, Elliott A. The frailty syndrome. *Med (United Kingdom)* 2017;45:15–8. doi:10.1016/j.mpmed.2016.10.010
- 3 Sezgin D, O'Donovan M, Woo J, et al. Early identification of frailty: Developing an international delphi consensus on pre-frailty. *Arch Gerontol Geriatr* 2022;99:104586. doi:10.1016/j.archger.2021.104586
- 4 Sezgin D, Liew A, O'Donovan MR, et al. Pre-frailty as a multi-dimensional construct: A systematic review of definitions in the scientific literature. *Geriatr Nurs (Minneap)* 2020;41:139–46. doi:10.1016/j.gerinurse.2019.08.004
- 5 Fried LP, Tangen CM, Walston J, et al. Frailty in older adults: evidence for a phenotype. *J Gerontol A Biol Sci Med Sci* 2001;56:M146–56. doi:10.1093/gerona/56.3.m146
- 6 United Nations Department of Economic and Social Affairs. World Population Ageing 2019. 2020. [http://link.springer.com/chapter/10.1007/978-94-007-5204-7\\_6](http://link.springer.com/chapter/10.1007/978-94-007-5204-7_6)
- 7 Reinders I, Visser M, Schaap L. Body weight and body composition in old age and their relationship with frailty. *Curr Opin Clin Nutr Metab Care* 2017;20:11–5. doi:10.1097/MCO.0000000000000332
- 8 Xu L, Zhang J, Shen S, et al. Association Between Body Composition and Frailty in Elder Inpatients. *Clin Interv Aging* 2020;Volume 15:313–20. doi:10.2147/CIA.S243211
- 9 Villareal DT, Apovian CM, Kushner RF, et al. Obesity in Older Adults: Technical Review and Position Statement of the American Society for Nutrition and NAASO, The Obesity Society. *Obes Res* 2005;13:1849–63. doi:10.1038/oby.2005.228
- 10 Bowen ME. The Relationship Between Body Weight, Frailty, and the Disablement Process. *Journals Gerontol Ser B Psychol Sci Soc Sci* 2012;67:618–26. doi:10.1093/geronb/gbs067
- 11 Blaum CS, Xue QL, Michelon E, et al. The Association Between Obesity and the Frailty

- 1  
2  
3 Syndrome in Older Women: The Women's Health and Aging Studies. *J Am Geriatr Soc*  
4 2005;53:927–34. doi:10.1111/j.1532-5415.2005.53300.x  
5  
6  
7 12 Rietman ML, van der a DL, van Oostrom SH, et al. The Association Between BMI and Different  
8 Frailty Domains: A U-Shaped Curve? *J Nutr Heal Aging* 2018;22:8–15. doi:10.1007/s12603-016-  
9 0854-3  
10  
11  
12  
13 13 Porter Starr KN, McDonald SR, Bales CW. Obesity and physical frailty in older adults: A scoping  
14 review of lifestyle intervention trials. *J Am Med Dir Assoc* 2014;15:240–50.  
15 doi:10.1016/j.jamda.2013.11.008  
16  
17  
18 14 Hubbard RE, Lang IA, Llewellyn DJ, et al. Frailty, Body Mass Index, and Abdominal Obesity in  
19 Older People. *Journals Gerontol Ser A Biol Sci Med Sci* 2010;65A:377–81.  
20 doi:10.1093/gerona/glp186  
21  
22  
23 15 Crow RS, Lohman MC, Titus AJ, et al. Association of Obesity and Frailty in Older Adults:  
24 NHANES 1999–2004. *J Nutr Health Aging* 2019;23:138–44. doi:10.1007/s12603-018-1138-x  
25  
26  
27 16 Himes CL. Obesity, disease, and functional limitation in later life. *Demography* 2000;37:73–82.  
28 doi:10.2307/2648097  
29  
30  
31  
32 17 Bales CW, Buhr G. Is obesity bad for older persons? A systematic review of the pros and cons of  
33 weight reduction in later life. *J Am Med Dir Assoc* 2008;9:302–12.  
34 doi:10.1016/j.jamda.2008.01.006  
35  
36  
37 18 Jarosz PA, Bellar A. Sarcopenic obesity: an emerging cause of frailty in older adults. *Geriatr Nurs*  
38 2009;30:64–70. doi:10.1016/j.gerinurse.2008.02.010  
39  
40  
41 19 Liu X, Huang Y, Lo K, et al. Quotient of Waist Circumference and Body Mass Index: A Valuable  
42 Indicator for the High-Risk Phenotype of Obesity. *Front Endocrinol (Lausanne)* 2021;12:1–10.  
43 doi:10.3389/fendo.2021.697437  
44  
45  
46  
47 20 Cornier MA, Després JP, Davis N, et al. Assessing adiposity: A scientific statement from the  
48 American heart association. *Circulation* 2011;124:1996–2019.  
49 doi:10.1161/CIR.0b013e318233bc6a  
50  
51  
52  
53 21 Lundblad MW, Jacobsen BK, Johansson J, et al. Anthropometric measures are satisfactory  
54 substitutes for the DXA-derived visceral adipose tissue in the association with cardiometabolic  
55  
56  
57  
58  
59  
60

- 1  
2  
3 risk-The Tromsø Study 2015-2016. doi:10.1002/osp4.517  
4  
5  
6 22 Woods NF, LaCroix AZ, Gray SL, et al. Frailty: emergence and consequences in women aged 65  
7 and older in the Women's Health Initiative Observational Study. *J Am Geriatr Soc* 2005;53:1321–  
8 30. doi:10.1111/j.1532-5415.2005.53405.x  
9  
10  
11 23 Stenholm S, Strandberg TE, Pitkälä K, et al. Midlife obesity and risk of frailty in old age during a  
12 22-year follow-up in men and women: The mini-Finland follow-up survey. *Journals Gerontol - Ser*  
13 *A Biol Sci Med Sci* 2014;69:73–8. doi:10.1093/gerona/glt052  
14  
15  
16  
17 24 Strandberg TE, Sirola J, Pitkälä KH, et al. Association of midlife obesity and cardiovascular risk  
18 with old age frailty: A 26-year follow-up of initially healthy men. *Int J Obes* 2012;36:1153–7.  
19 doi:10.1038/ijo.2012.83  
20  
21  
22  
23 25 Liao Q, Zheng Z, Xiu S, et al. Waist circumference is a better predictor of risk for frailty than BMI  
24 in the community-dwelling elderly in Beijing. *Aging Clin Exp Res* 2018;30:1319–25.  
25 doi:10.1007/s40520-018-0933-x  
26  
27  
28  
29 26 Falsarella G, Gasparotto LPR, Barcelos CC, et al. Body composition as a frailty marker for the  
30 elderly community. *Clin Interv Aging* 2015;10:1661. doi:10.2147/CIA.S84632  
31  
32  
33 27 García-Esquinas E, José García-García F, León-Muñoz LM, et al. Obesity, fat distribution, and risk  
34 of frailty in two population-based cohorts of older adults in Spain. *Obesity* 2015;23:847–55.  
35 doi:10.1002/oby.21013  
36  
37  
38  
39 28 Malenfant JH, Batsis JA. Obesity in the geriatric population – a global health perspective. *J Glob*  
40 *Heal Reports* 2019;3. doi:10.29392/joghr.3.e2019045  
41  
42  
43 29 Mezuk B, Lohman MC, Rock AK, et al. Trajectories of body mass indices and development of  
44 frailty: Evidence from the health and retirement study. *Obesity* 2016;24:1643–7.  
45 doi:10.1002/oby.21572  
46  
47  
48  
49 30 Landré B, Czernichow S, Goldberg M, et al. Association Between Life-Course Obesity and Frailty  
50 in Older Adults: Findings in the GAZEL Cohort. *Obesity (Silver Spring)* 2020;28:388–96.  
51 doi:10.1002/oby.22682  
52  
53  
54 31 UiT. The Arctic University of Norway. The Tromsø Study | UiT.  
55 <https://uit.no/research/tromsostudy> (accessed 29 Jan 2022).  
56  
57  
58  
59  
60

- 1  
2  
3 32 World Health Organisation (WHO). Obesity : preventing and managing the global epidemic :  
4 report of a WHO consultation (WHO technical report series ; 894). 2000.  
5 <https://apps.who.int/iris/handle/10665/42330>  
6  
7  
8  
9 33 World Health Organisation (WHO). Waist Circumference and Waist–Hip Ratio. Report of a WHO  
10 Expert Consultation. Geneva, 8-11 December 2008. Geneva: 2008.  
11 [http://apps.who.int/iris/bitstream/handle/10665/44583/9789241501491\\_eng.pdf?sequence=1](http://apps.who.int/iris/bitstream/handle/10665/44583/9789241501491_eng.pdf?sequence=1)  
12  
13  
14 34 Elia M. The ‘MUST’ report. Nutritional screening of adults: a multidisciplinary responsibility.  
15 Development and use of the ‘Malnutrition Universal Screening Tool’ (MUST) for adults. BAPEN  
16 2003.  
17  
18  
19  
20 35 Derogatis LR, Lipman RS, Rickels K, et al. The Hopkins Symptom Checklist (HSCL): a self-  
21 report symptom inventory. *Behav Sci* 1974;19:1–15. doi:10.1002/bs.3830190102  
22  
23  
24 36 Bergland A, Strand BH. Norwegian reference values for the Short Physical Performance Battery  
25 (SPPB): the Tromsø Study. *BMC Geriatr* 2019;19:216. doi:10.1186/s12877-019-1234-8  
26  
27  
28 37 Freiburger E, de Vreede P, Schoene D, et al. Performance-based physical function in older  
29 community-dwelling persons: a systematic review of instruments. *Age Ageing* 2012;41:712–21.  
30 doi:10.1093/ageing/afs099  
31  
32  
33  
34 38 Roberts HC, Denison HJ, Martin HJ, et al. A review of the measurement of grip strength in clinical  
35 and epidemiological studies: Towards a standardised approach. *Age Ageing* 2011;40:423–9.  
36 doi:10.1093/ageing/afr051  
37  
38  
39  
40 39 Grimby G, Börjesson M, Jonsdottir IH, et al. The ‘Saltin-Grimby Physical Activity Level Scale’  
41 and its application to health research. *Scand J Med Sci Sports* 2015;25 Suppl 4:119–25.  
42 doi:10.1111/sms.12611  
43  
44  
45  
46 40 Charlson ME, Pompei P, Ales KL, et al. A new method of classifying prognostic comorbidity in  
47 longitudinal studies: development and validation. *J Chronic Dis* 1987;40:373–83.  
48 doi:10.1016/0021-9681(87)90171-8  
49  
50  
51 41 De Rubeis V, Andreacchi AT, Sharpe I, et al. Group-based trajectory modeling of body mass index  
52 and body size over the life course: A scoping review. *Obes Sci Pract* 2021;7:100–28.  
53 doi:10.1002/osp4.456  
54  
55  
56  
57  
58  
59  
60

- 1  
2  
3 42 Jones BL, Nagin DS. A Note on a Stata Plugin for Estimating Group-based Trajectory Models.  
4 *Sociol Methods Res* 2013;42:608–13. doi:10.1177/0049124113503141  
5  
6  
7 43 StataCorp. Stata Statistical Software: Release 16. College Station, TX: Stata Corp LLC, 2019.  
8  
9  
10 44 Afonso C, Sousa-Santos AR, Santos A, et al. Frailty status is related to general and abdominal  
11 obesity in older adults. *Nutr Res* 2021;85:21–30. doi:10.1016/j.nutres.2020.10.009  
12  
13  
14 45 Soysal P, Stubbs B, Lucato P, et al. Inflammation and frailty in the elderly: A systematic review  
15 and meta-analysis. *Ageing Res Rev* 2016;31:1–8. doi:10.1016/J.ARR.2016.08.006  
16  
17  
18 46 Goodpaster BH, Theriault R, Watkins SC, et al. Intramuscular lipid content is increased in obesity  
19 and decreased by weight loss. *Metabolism* 2000;49:467–72. doi:10.1016/s0026-0495(00)80010-4  
20  
21  
22 47 Villareal DT, Banks M, Siener C, et al. Physical frailty and body composition in obese elderly men  
23 and women. *Obes Res* 2004;12:913–20. doi:10.1038/oby.2004.111  
24  
25  
26 48 Baumgartner RN, Wayne SJ, Waters DL, et al. Sarcopenic obesity predicts instrumental activities  
27 of daily living disability in the elderly. *Obes Res* 2004;12:1995–2004. doi:10.1038/oby.2004.250  
28  
29  
30 49 Grundy SM, Neeland IJ, Turer AT, et al. Clinical Study Waist Circumference as Measure of  
31 Abdominal Fat Compartments. *J Obes* 2013;2013. doi:10.1155/2013/454285  
32  
33  
34 50 Buta BJ, Walston JD, Godino JG, et al. Frailty assessment instruments: Systematic characterisation  
35 of the uses and contexts of highly-cited instruments. *Ageing Res Rev* 2016;26:53–61.  
36 doi:10.1016/j.arr.2015.12.003  
37  
38  
39  
40 51 O’Caoimh R, Sezgin D, O’Donovan MR, et al. Prevalence of frailty in 62 countries across the  
41 world: a systematic review and meta-analysis of population-level studies. *Age Ageing* 2021;50:96–  
42 104. doi:10.1093/ageing/afaa219  
43  
44  
45  
46 52 Cooper R, Shkolnikov VM, Kudryavtsev A V., et al. Between-study differences in grip strength: a  
47 comparison of Norwegian and Russian adults aged 40–69 years. *J Cachexia Sarcopenia Muscle*  
48 2021;12:2091–100. doi:10.1002/jcsm.12816  
49  
50  
51  
52 53 OECD, European Observatory on Health Systems and Policies (2021). Norway: Country Health  
53 Profile 2021, State of Health in the EU. OECD Publishing 2021. doi:10.1787/6871e6c4-en  
54  
55  
56 54 Gordon SJ, Baker N, Kidd M, et al. Pre-frailty factors in community-dwelling 40-75 year olds:  
57  
58  
59

opportunities for successful ageing. *BMC Geriatr* 2020;20:96. doi:10.1186/s12877-020-1490-7

For peer review only



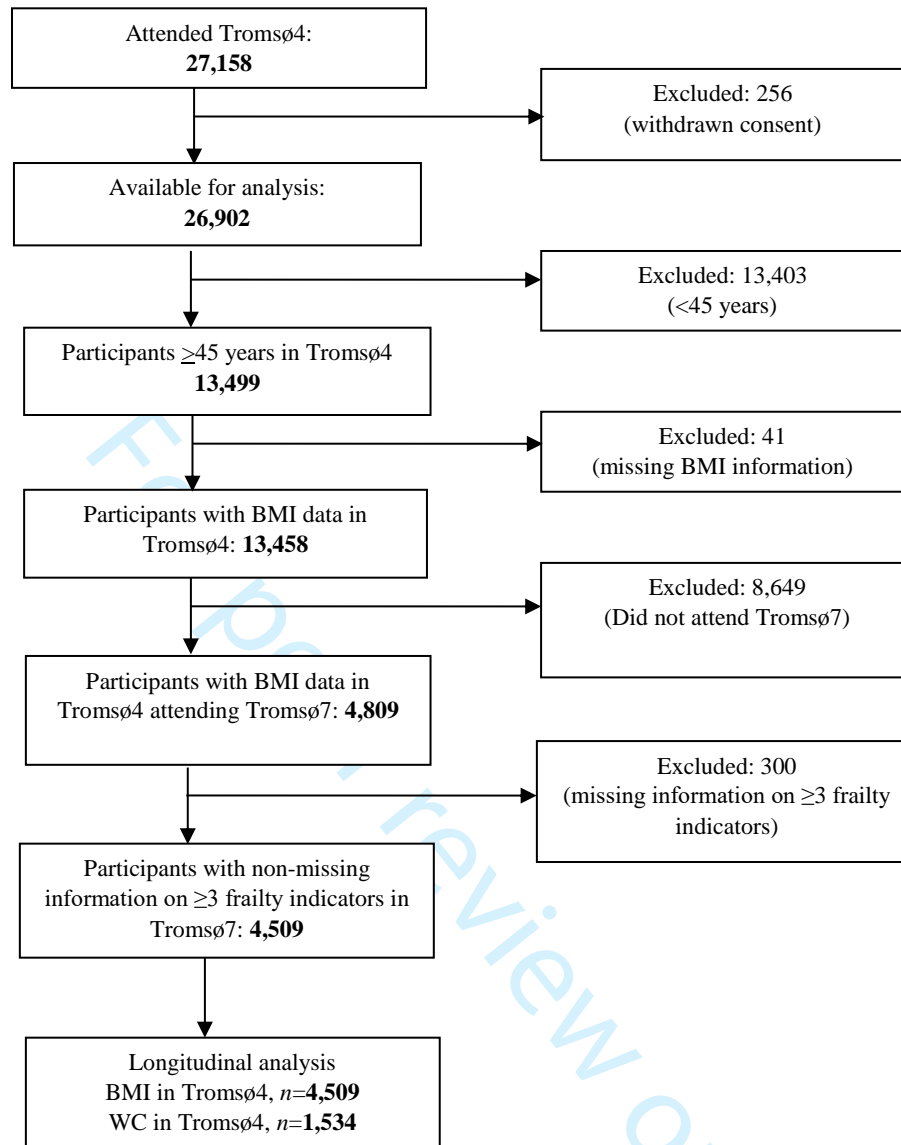

Figure 1 Flowchart displaying participants' inclusion and exclusion

1  
2  
3  
4  
5  
6  
7  
8  
9  
10  
11  
12  
13  
14  
15  
16  
17  
18  
19  
20  
21  
22  
23  
24  
25  
26  
27  
28  
29  
30  
31  
32  
33  
34  
35  
36  
37  
38  
39  
40  
41  
42  
43  
44  
45  
46  
47  
48  
49  
50  
51  
52  
53  
54  
55  
56  
57  
58  
59  
60

## SUPPLEMENTARY TABLES

For peer review only

Supplementary Table 1 Comparison between Fried et al.'s suggested criteria for frailty and modified frailty indicators used in this study

| Frailty                  | Fried et al. (2001)                                                                                                                                                                                                                                                                                                                                                                                                                                                                                                                                                                                                                                                                                                                                                                                                                | Current study                                                                                                                                                                                                                                                                                                                                                                                                                                                                                                                                                                                 |                                                      |         |        |             |        |             |        |         |        |         |        |             |          |             |        |         |        |                                                                                                                                                                                                                                                                                                                                                                                                                                                                                                                                                                                                                                                                                                                                                                                      |     |                                                      |         |        |             |        |             |        |         |        |         |        |             |          |             |        |         |        |
|--------------------------|------------------------------------------------------------------------------------------------------------------------------------------------------------------------------------------------------------------------------------------------------------------------------------------------------------------------------------------------------------------------------------------------------------------------------------------------------------------------------------------------------------------------------------------------------------------------------------------------------------------------------------------------------------------------------------------------------------------------------------------------------------------------------------------------------------------------------------|-----------------------------------------------------------------------------------------------------------------------------------------------------------------------------------------------------------------------------------------------------------------------------------------------------------------------------------------------------------------------------------------------------------------------------------------------------------------------------------------------------------------------------------------------------------------------------------------------|------------------------------------------------------|---------|--------|-------------|--------|-------------|--------|---------|--------|---------|--------|-------------|----------|-------------|--------|---------|--------|--------------------------------------------------------------------------------------------------------------------------------------------------------------------------------------------------------------------------------------------------------------------------------------------------------------------------------------------------------------------------------------------------------------------------------------------------------------------------------------------------------------------------------------------------------------------------------------------------------------------------------------------------------------------------------------------------------------------------------------------------------------------------------------|-----|------------------------------------------------------|---------|--------|-------------|--------|-------------|--------|---------|--------|---------|--------|-------------|----------|-------------|--------|---------|--------|
| <b>Exhaustion</b>        | <p>Questions from the Center for Epidemiologic Studies Depression Scale:</p> <p>(a) I felt that everything I did was an effort</p> <p>(b) I could not get going</p> <p>How often in the last week did you feel this way?</p> <p>0 = Rarely or none of the time (&lt;1 day)</p> <p>1 = Some or a little of the time (1–2 days)</p> <p>2 = A moderate amount of time (3–4 days)</p> <p>3 = Most of the time</p> <p><b>Exhausted: “A moderate amount of time (3–4 days)” or “Most of the time”</b></p>                                                                                                                                                                                                                                                                                                                                | <p>Hopkins Symptom Checklist (HSCL-10):</p> <p>During the last week, have you experienced that everything is a struggle?</p> <p>1 = No complaint</p> <p>2 = Little complaint</p> <p>3 = Pretty much</p> <p>4 = Very much</p> <p><b>Exhausted: “Pretty much” or “Very much”</b></p>                                                                                                                                                                                                                                                                                                            |                                                      |         |        |             |        |             |        |         |        |         |        |             |          |             |        |         |        |                                                                                                                                                                                                                                                                                                                                                                                                                                                                                                                                                                                                                                                                                                                                                                                      |     |                                                      |         |        |             |        |             |        |         |        |         |        |             |          |             |        |         |        |
| <b>Physical activity</b> | <p>Minnesota Leisure Time Activity Questionnaire asking about walking, chores (moderately strenuous), mowing the lawn, raking, gardening, hiking, jogging, biking, exercise, cycling, dancing, aerobics, bowling, golf, singles, tennis, racquetball, calisthenics, swimming.</p> <p>The kcal/week expended was calculated using a standardized algorithm. Lowest 20% were identified, resulting in following cut-off for frailty:</p> <p>Men: &lt;383 kcal of physical activity/week</p> <p>Women: &lt;270 kcal of physical activity/week</p>                                                                                                                                                                                                                                                                                     | <p>Describe your exercise and physical exertion in leisure time over the last year (Saltin &amp; Grimby's Scale).</p> <p>1 = Reading, watching TV/screen or other sedentary activity</p> <p>2 = Walking, cycling, or other forms of exercise at least 4 hours a week</p> <p>3 = Participation in recreational sports, heavy gardening, snow shoveling, etc. at least 4 hours a week</p> <p>4 = Participation in hard training or sports competitions, regularly several times a week</p> <p><b>Low physical activity level: “Reading, watching TV/screen or other sedentary activity”</b></p> |                                                      |         |        |             |        |             |        |         |        |         |        |             |          |             |        |         |        |                                                                                                                                                                                                                                                                                                                                                                                                                                                                                                                                                                                                                                                                                                                                                                                      |     |                                                      |         |        |             |        |             |        |         |        |         |        |             |          |             |        |         |        |
| <b>Weight loss</b>       | <p>In the last year, have you lost more than 10 pounds (4.5 kg) unintentionally (not due to dieting or exercise)?</p> <p><b>Frail: “Yes”</b></p>                                                                                                                                                                                                                                                                                                                                                                                                                                                                                                                                                                                                                                                                                   | <p>Have you involuntarily lost weight during the last 6 months? (Malnutrition Universal Screening Tool)</p> <p>0 = No</p> <p>1 = Yes</p> <p><b>Frail: “Yes”</b></p>                                                                                                                                                                                                                                                                                                                                                                                                                           |                                                      |         |        |             |        |             |        |         |        |         |        |             |          |             |        |         |        |                                                                                                                                                                                                                                                                                                                                                                                                                                                                                                                                                                                                                                                                                                                                                                                      |     |                                                      |         |        |             |        |             |        |         |        |         |        |             |          |             |        |         |        |
| <b>Grip strength</b>     | <p>Measured by Jamar dynamometer (kg)</p> <p>Maximal strength in dominant hand (3 trials)</p> <p>Stratified by sex and BMI quartiles. Lowest 20% were identified, resulting in the following cut-off for frailty:</p> <table border="1"> <thead> <tr> <th>Men</th> <th>Cut-off for grip strength (kg) criterion for frailty</th> </tr> </thead> <tbody> <tr> <td>BMI ≤24</td> <td>≤29 kg</td> </tr> <tr> <td>BMI 24.1–26</td> <td>≤30 kg</td> </tr> <tr> <td>BMI 26.1–28</td> <td>≤30 kg</td> </tr> <tr> <td>BMI &gt;28</td> <td>≤32 kg</td> </tr> </tbody> </table> <p><b>Women</b></p> <table border="1"> <tbody> <tr> <td>BMI ≤23</td> <td>≤17 kg</td> </tr> <tr> <td>BMI 23.1–26</td> <td>≤17.3 kg</td> </tr> <tr> <td>BMI 26.1–29</td> <td>≤18 kg</td> </tr> <tr> <td>BMI &gt;29</td> <td>≤21 kg</td> </tr> </tbody> </table> | Men                                                                                                                                                                                                                                                                                                                                                                                                                                                                                                                                                                                           | Cut-off for grip strength (kg) criterion for frailty | BMI ≤24 | ≤29 kg | BMI 24.1–26 | ≤30 kg | BMI 26.1–28 | ≤30 kg | BMI >28 | ≤32 kg | BMI ≤23 | ≤17 kg | BMI 23.1–26 | ≤17.3 kg | BMI 26.1–29 | ≤18 kg | BMI >29 | ≤21 kg | <p>Measured by Jamar dynamometer (kg)</p> <p>Strongest measurement from 3 trials in each hand</p> <p>Stratified by sex and BMI quartiles as per Fried's definition:</p> <table border="1"> <thead> <tr> <th>Men</th> <th>Cut-off for grip strength (kg) criterion for frailty</th> </tr> </thead> <tbody> <tr> <td>BMI ≤24</td> <td>≤29 kg</td> </tr> <tr> <td>BMI 24.1–26</td> <td>≤30 kg</td> </tr> <tr> <td>BMI 26.1–28</td> <td>≤30 kg</td> </tr> <tr> <td>BMI &gt;28</td> <td>≤32 kg</td> </tr> </tbody> </table> <p><b>Women</b></p> <table border="1"> <tbody> <tr> <td>BMI ≤23</td> <td>≤17 kg</td> </tr> <tr> <td>BMI 23.1–26</td> <td>≤17.3 kg</td> </tr> <tr> <td>BMI 26.1–29</td> <td>≤18 kg</td> </tr> <tr> <td>BMI &gt;29</td> <td>≤21 kg</td> </tr> </tbody> </table> | Men | Cut-off for grip strength (kg) criterion for frailty | BMI ≤24 | ≤29 kg | BMI 24.1–26 | ≤30 kg | BMI 26.1–28 | ≤30 kg | BMI >28 | ≤32 kg | BMI ≤23 | ≤17 kg | BMI 23.1–26 | ≤17.3 kg | BMI 26.1–29 | ≤18 kg | BMI >29 | ≤21 kg |
| Men                      | Cut-off for grip strength (kg) criterion for frailty                                                                                                                                                                                                                                                                                                                                                                                                                                                                                                                                                                                                                                                                                                                                                                               |                                                                                                                                                                                                                                                                                                                                                                                                                                                                                                                                                                                               |                                                      |         |        |             |        |             |        |         |        |         |        |             |          |             |        |         |        |                                                                                                                                                                                                                                                                                                                                                                                                                                                                                                                                                                                                                                                                                                                                                                                      |     |                                                      |         |        |             |        |             |        |         |        |         |        |             |          |             |        |         |        |
| BMI ≤24                  | ≤29 kg                                                                                                                                                                                                                                                                                                                                                                                                                                                                                                                                                                                                                                                                                                                                                                                                                             |                                                                                                                                                                                                                                                                                                                                                                                                                                                                                                                                                                                               |                                                      |         |        |             |        |             |        |         |        |         |        |             |          |             |        |         |        |                                                                                                                                                                                                                                                                                                                                                                                                                                                                                                                                                                                                                                                                                                                                                                                      |     |                                                      |         |        |             |        |             |        |         |        |         |        |             |          |             |        |         |        |
| BMI 24.1–26              | ≤30 kg                                                                                                                                                                                                                                                                                                                                                                                                                                                                                                                                                                                                                                                                                                                                                                                                                             |                                                                                                                                                                                                                                                                                                                                                                                                                                                                                                                                                                                               |                                                      |         |        |             |        |             |        |         |        |         |        |             |          |             |        |         |        |                                                                                                                                                                                                                                                                                                                                                                                                                                                                                                                                                                                                                                                                                                                                                                                      |     |                                                      |         |        |             |        |             |        |         |        |         |        |             |          |             |        |         |        |
| BMI 26.1–28              | ≤30 kg                                                                                                                                                                                                                                                                                                                                                                                                                                                                                                                                                                                                                                                                                                                                                                                                                             |                                                                                                                                                                                                                                                                                                                                                                                                                                                                                                                                                                                               |                                                      |         |        |             |        |             |        |         |        |         |        |             |          |             |        |         |        |                                                                                                                                                                                                                                                                                                                                                                                                                                                                                                                                                                                                                                                                                                                                                                                      |     |                                                      |         |        |             |        |             |        |         |        |         |        |             |          |             |        |         |        |
| BMI >28                  | ≤32 kg                                                                                                                                                                                                                                                                                                                                                                                                                                                                                                                                                                                                                                                                                                                                                                                                                             |                                                                                                                                                                                                                                                                                                                                                                                                                                                                                                                                                                                               |                                                      |         |        |             |        |             |        |         |        |         |        |             |          |             |        |         |        |                                                                                                                                                                                                                                                                                                                                                                                                                                                                                                                                                                                                                                                                                                                                                                                      |     |                                                      |         |        |             |        |             |        |         |        |         |        |             |          |             |        |         |        |
| BMI ≤23                  | ≤17 kg                                                                                                                                                                                                                                                                                                                                                                                                                                                                                                                                                                                                                                                                                                                                                                                                                             |                                                                                                                                                                                                                                                                                                                                                                                                                                                                                                                                                                                               |                                                      |         |        |             |        |             |        |         |        |         |        |             |          |             |        |         |        |                                                                                                                                                                                                                                                                                                                                                                                                                                                                                                                                                                                                                                                                                                                                                                                      |     |                                                      |         |        |             |        |             |        |         |        |         |        |             |          |             |        |         |        |
| BMI 23.1–26              | ≤17.3 kg                                                                                                                                                                                                                                                                                                                                                                                                                                                                                                                                                                                                                                                                                                                                                                                                                           |                                                                                                                                                                                                                                                                                                                                                                                                                                                                                                                                                                                               |                                                      |         |        |             |        |             |        |         |        |         |        |             |          |             |        |         |        |                                                                                                                                                                                                                                                                                                                                                                                                                                                                                                                                                                                                                                                                                                                                                                                      |     |                                                      |         |        |             |        |             |        |         |        |         |        |             |          |             |        |         |        |
| BMI 26.1–29              | ≤18 kg                                                                                                                                                                                                                                                                                                                                                                                                                                                                                                                                                                                                                                                                                                                                                                                                                             |                                                                                                                                                                                                                                                                                                                                                                                                                                                                                                                                                                                               |                                                      |         |        |             |        |             |        |         |        |         |        |             |          |             |        |         |        |                                                                                                                                                                                                                                                                                                                                                                                                                                                                                                                                                                                                                                                                                                                                                                                      |     |                                                      |         |        |             |        |             |        |         |        |         |        |             |          |             |        |         |        |
| BMI >29                  | ≤21 kg                                                                                                                                                                                                                                                                                                                                                                                                                                                                                                                                                                                                                                                                                                                                                                                                                             |                                                                                                                                                                                                                                                                                                                                                                                                                                                                                                                                                                                               |                                                      |         |        |             |        |             |        |         |        |         |        |             |          |             |        |         |        |                                                                                                                                                                                                                                                                                                                                                                                                                                                                                                                                                                                                                                                                                                                                                                                      |     |                                                      |         |        |             |        |             |        |         |        |         |        |             |          |             |        |         |        |
| Men                      | Cut-off for grip strength (kg) criterion for frailty                                                                                                                                                                                                                                                                                                                                                                                                                                                                                                                                                                                                                                                                                                                                                                               |                                                                                                                                                                                                                                                                                                                                                                                                                                                                                                                                                                                               |                                                      |         |        |             |        |             |        |         |        |         |        |             |          |             |        |         |        |                                                                                                                                                                                                                                                                                                                                                                                                                                                                                                                                                                                                                                                                                                                                                                                      |     |                                                      |         |        |             |        |             |        |         |        |         |        |             |          |             |        |         |        |
| BMI ≤24                  | ≤29 kg                                                                                                                                                                                                                                                                                                                                                                                                                                                                                                                                                                                                                                                                                                                                                                                                                             |                                                                                                                                                                                                                                                                                                                                                                                                                                                                                                                                                                                               |                                                      |         |        |             |        |             |        |         |        |         |        |             |          |             |        |         |        |                                                                                                                                                                                                                                                                                                                                                                                                                                                                                                                                                                                                                                                                                                                                                                                      |     |                                                      |         |        |             |        |             |        |         |        |         |        |             |          |             |        |         |        |
| BMI 24.1–26              | ≤30 kg                                                                                                                                                                                                                                                                                                                                                                                                                                                                                                                                                                                                                                                                                                                                                                                                                             |                                                                                                                                                                                                                                                                                                                                                                                                                                                                                                                                                                                               |                                                      |         |        |             |        |             |        |         |        |         |        |             |          |             |        |         |        |                                                                                                                                                                                                                                                                                                                                                                                                                                                                                                                                                                                                                                                                                                                                                                                      |     |                                                      |         |        |             |        |             |        |         |        |         |        |             |          |             |        |         |        |
| BMI 26.1–28              | ≤30 kg                                                                                                                                                                                                                                                                                                                                                                                                                                                                                                                                                                                                                                                                                                                                                                                                                             |                                                                                                                                                                                                                                                                                                                                                                                                                                                                                                                                                                                               |                                                      |         |        |             |        |             |        |         |        |         |        |             |          |             |        |         |        |                                                                                                                                                                                                                                                                                                                                                                                                                                                                                                                                                                                                                                                                                                                                                                                      |     |                                                      |         |        |             |        |             |        |         |        |         |        |             |          |             |        |         |        |
| BMI >28                  | ≤32 kg                                                                                                                                                                                                                                                                                                                                                                                                                                                                                                                                                                                                                                                                                                                                                                                                                             |                                                                                                                                                                                                                                                                                                                                                                                                                                                                                                                                                                                               |                                                      |         |        |             |        |             |        |         |        |         |        |             |          |             |        |         |        |                                                                                                                                                                                                                                                                                                                                                                                                                                                                                                                                                                                                                                                                                                                                                                                      |     |                                                      |         |        |             |        |             |        |         |        |         |        |             |          |             |        |         |        |
| BMI ≤23                  | ≤17 kg                                                                                                                                                                                                                                                                                                                                                                                                                                                                                                                                                                                                                                                                                                                                                                                                                             |                                                                                                                                                                                                                                                                                                                                                                                                                                                                                                                                                                                               |                                                      |         |        |             |        |             |        |         |        |         |        |             |          |             |        |         |        |                                                                                                                                                                                                                                                                                                                                                                                                                                                                                                                                                                                                                                                                                                                                                                                      |     |                                                      |         |        |             |        |             |        |         |        |         |        |             |          |             |        |         |        |
| BMI 23.1–26              | ≤17.3 kg                                                                                                                                                                                                                                                                                                                                                                                                                                                                                                                                                                                                                                                                                                                                                                                                                           |                                                                                                                                                                                                                                                                                                                                                                                                                                                                                                                                                                                               |                                                      |         |        |             |        |             |        |         |        |         |        |             |          |             |        |         |        |                                                                                                                                                                                                                                                                                                                                                                                                                                                                                                                                                                                                                                                                                                                                                                                      |     |                                                      |         |        |             |        |             |        |         |        |         |        |             |          |             |        |         |        |
| BMI 26.1–29              | ≤18 kg                                                                                                                                                                                                                                                                                                                                                                                                                                                                                                                                                                                                                                                                                                                                                                                                                             |                                                                                                                                                                                                                                                                                                                                                                                                                                                                                                                                                                                               |                                                      |         |        |             |        |             |        |         |        |         |        |             |          |             |        |         |        |                                                                                                                                                                                                                                                                                                                                                                                                                                                                                                                                                                                                                                                                                                                                                                                      |     |                                                      |         |        |             |        |             |        |         |        |         |        |             |          |             |        |         |        |
| BMI >29                  | ≤21 kg                                                                                                                                                                                                                                                                                                                                                                                                                                                                                                                                                                                                                                                                                                                                                                                                                             |                                                                                                                                                                                                                                                                                                                                                                                                                                                                                                                                                                                               |                                                      |         |        |             |        |             |        |         |        |         |        |             |          |             |        |         |        |                                                                                                                                                                                                                                                                                                                                                                                                                                                                                                                                                                                                                                                                                                                                                                                      |     |                                                      |         |        |             |        |             |        |         |        |         |        |             |          |             |        |         |        |

| Frailty               | Fried et al. (2001)                                                                                                                                                                                                                                                                                                                                                                                   | Current study                                                                                                                                                                                                                                                                                                                                                                                                |
|-----------------------|-------------------------------------------------------------------------------------------------------------------------------------------------------------------------------------------------------------------------------------------------------------------------------------------------------------------------------------------------------------------------------------------------------|--------------------------------------------------------------------------------------------------------------------------------------------------------------------------------------------------------------------------------------------------------------------------------------------------------------------------------------------------------------------------------------------------------------|
| <b>Walking speed</b>  | Time to walk (seconds) <u>15 feet at usual pace</u> stratified by sex and height (gender-specific cut-off at medium height): Lowest 20% were identified, resulting in the following cut-off for frailty:<br><b>Men</b> <b>Cut-off for walking speed criterion for frailty</b><br>Height ≤173 cm    ≥7 s<br>Height >173 cm    ≥6 s<br><b>Women</b><br>Height ≤159 cm    ≥7 s<br>Height >159 cm    ≥6 s | SPPB: Short Physical Performance Battery – walking test<br>Fastest of two times (seconds) to walk 4 m stratified by sex and height according to Fried's gender-specific cut-off. Converted to feet from meters.<br><b>Men</b> <b>Cut-off for walking speed criterion for frailty</b><br>Height ≤173 cm    ≥7 s<br>Height >173 cm    ≥6 s<br><b>Women</b><br>Height ≤159 cm    ≥7 s<br>Height >159 cm    ≥6 s |
| <b>Frailty status</b> | Frailty score:<br>0 = Robust<br>1–2 = Pre-frail<br>≥3 = Frail                                                                                                                                                                                                                                                                                                                                         | Frailty score:<br>0 = Robust<br>1–2 = Pre-frail<br>≥3 = Frail<br><br>Pre-frailty/frailty score:<br>0 = Robust<br>≥1 = Pre-frail/frail                                                                                                                                                                                                                                                                        |

Supplementary Table 2 Descriptive characteristics of participants at follow-up: The Tromsø Study 2015-2016

|                                             | Frailty status                    |                                             | P value            |
|---------------------------------------------|-----------------------------------|---------------------------------------------|--------------------|
|                                             | Robust<br>(% (n))<br>70.5 (3,179) | Pre-frail/ frail<br>(% (n))<br>29.5 (1,330) |                    |
| Age in years, mean (SD)                     | 72.1 (5.1)                        | 73.8 (5.9)                                  | <0.05 <sup>a</sup> |
| <b>Women</b>                                | 50.6 (1608)                       | 55.0 (732)                                  | <0.05              |
| <b>Smoking status</b>                       |                                   |                                             |                    |
| Current smokers                             | 8.3 (262)                         | 14.4 (188)                                  |                    |
| Former smokers                              | 53.2 (1,674)                      | 50.8 (666)                                  | <0.05              |
| Never                                       | 38.4 (1,208)                      | 34.8 (456)                                  |                    |
| <b>Married or cohabiting</b>                | 71.0 (2,258)                      | 64.6 (859)                                  | <0.05              |
| <b>Self-perceived health – good</b>         | 69.4 (2,178)                      | 43.2 (566)                                  | <0.05              |
| <b>Social support – enough good friends</b> | 87.4 (2,676)                      | 82.0 (1,047)                                | <0.05              |
| <b>Educational level</b>                    |                                   |                                             |                    |
| Primary/Partly secondary                    | 39.1 (1,201)                      | 50 (632)                                    |                    |
| Upper secondary                             | 26.6 (817)                        | 26.2 (331)                                  | <0.05              |
| College/University short                    | 16.3 (500)                        | 12.2 (154)                                  |                    |
| College/University long                     | 18.1 (556)                        | 11.6 (147)                                  |                    |
| <b>Alcohol intake</b>                       |                                   |                                             |                    |
| Never/Abstaining                            | 11.2 (352)                        | 17.4 (229)                                  |                    |
| Infrequent drinkers                         | 58.6 (1,846)                      | 61.0 (803)                                  | < 0.05             |
| Frequent drinkers                           | 30.3 (954)                        | 21.6 (284)                                  |                    |
| <b>Prevalent diseases</b>                   |                                   |                                             |                    |
| Pulmonary disease <sup>b</sup>              | 14.6 (444)                        | 19.9 (250)                                  | <0.05              |
| Coronary heart disease <sup>c</sup>         | 13.7 (415)                        | 19.3 (241)                                  | <0.05              |
| Diabetes                                    | 7.3 (224)                         | 14.8 (186)                                  | <0.05              |
| Cancer                                      | 15.6 (475)                        | 19.3 (243)                                  | <0.05              |
| Stroke                                      | 5.1 (154)                         | 8.1 (101)                                   | <0.05              |
| Peptic ulcer                                | –                                 | –                                           | <0.05              |
| <b>Comorbidity</b>                          | 89.8 (2,800)                      | 82.4 (1,075)                                | <0.05              |
| <b>BMI categories</b>                       |                                   |                                             |                    |
| Underweight                                 | 0.5 (17)                          | 1.4 (18)                                    |                    |
| Normal                                      | 30.0 (951)                        | 24.5 (323)                                  | <0.05              |
| Overweight                                  | 49.4 (1,566)                      | 41.4 (547)                                  |                    |
| Obese                                       | 20.1 (639)                        | 32.7 (432)                                  |                    |
| <b>WC categories</b>                        |                                   |                                             |                    |
| Normal                                      | 22.6 (716)                        | 17.1 (225)                                  |                    |
| Moderately high                             | 28.0 (888)                        | 21.3 (281)                                  | <0.05              |
| High                                        | 49.4 (1,569)                      | 61.6 (812)                                  |                    |

Values are percentage (number); P value:  $\chi^2$  test for categorical variables P value: <sup>a</sup>Student's t-test; <sup>b</sup>including asthma/chronic bronchitis/emphysema; <sup>c</sup>including angina pectoris/myocardial infarction. BMI, body mass index; WC, waist circumference.

**BMI categories**Underweight: <18.5 kg/m<sup>2</sup>Normal: 18.5–24.9 kg/m<sup>2</sup>Overweight: 25.0–29.9 kg/m<sup>2</sup>Obesity: ≥30 kg/m<sup>2</sup>**WC categories**

Normal: men ≤94 cm; women ≤80 cm

Moderately high: men 95–102 cm; women 81–88 cm

High: men &gt;102 cm; women &gt;88 cm

Supplementary Table 3 Descriptive baseline characteristics of Tromsø4 participants who attended Tromsø7 versus those who did not: The Tromsø Study 1994–2016

|                                             | Frailty status                               |                                          | P value            |
|---------------------------------------------|----------------------------------------------|------------------------------------------|--------------------|
|                                             | Not attended Tromsø7<br>n = 8,649<br>(% (n)) | Attended Tromsø7<br>n = 4,809<br>(% (n)) |                    |
| <b>Age in years, mean (SD)</b>              | 63.2 (11.0)                                  | 52.0 (5.8)                               | <0.05 <sup>a</sup> |
| <b>Women</b>                                | 52.4 (4,533)                                 | 52.4 (2520)                              | >0.05              |
| <b>Smoking status</b>                       |                                              |                                          |                    |
| Current smokers                             | 33.7 (2,916)                                 | 29.4 (1,414)                             |                    |
| Former smokers                              | 33.4 (2,886)                                 | 35.6 (1,714)                             | <0.05              |
| Never                                       | 32.9 (2,847)                                 | (34.9) 1,681                             |                    |
| <b>Married or cohabiting</b>                | 64.7 (5,568)                                 | (82.7) 3,977                             | <0.05              |
| <b>Self-perceived health status – good</b>  | 50.7 (4,378)                                 | (70.3) 3,379                             | <0.05              |
| <b>Social support – enough good friends</b> | 83.0 (5,775)                                 | (82.2) 3,590                             | >0.05              |
| <b>Educational level</b>                    |                                              |                                          |                    |
| Primary/Partly secondary                    | 57.2 (4,911)                                 | (36.9) 1,768                             |                    |
| Upper secondary                             | 27.5 (2,362)                                 | (34.1) 1,633                             | <0.05              |
| College/University short                    | 8.1 (696)                                    | (14.9) 716                               |                    |
| College/University long                     | 7.2 (622)                                    | (14.1) 678                               |                    |
| <b>Alcohol intake</b>                       |                                              |                                          |                    |
| Never/Abstaining                            | 24.5 (2,108)                                 | (10.2) 491                               |                    |
| Infrequent drinkers                         | 66.8 (5,749)                                 | (76.2) 3655                              | <0.05              |
| Frequent drinkers                           | 8.7 (744)                                    | (13.5) 649                               |                    |
| <b>Prevalent diseases</b>                   |                                              |                                          |                    |
| Pulmonary disease <sup>b</sup>              | 16.2 (1,097)                                 | (9.9) 430                                | <0.05              |
| Coronary heart disease <sup>c</sup>         | 14.8 (1,281)                                 | (3.1) 149                                | <0.05              |
| Diabetes                                    | 4.3 (374)                                    | (0.5) 25                                 | <0.05              |
| Cancer                                      | 7.7 (517)                                    | (3.1) 132                                | <0.05              |
| Stroke                                      | 3.7 (318)                                    | (0.7) 33                                 | <0.05              |
| Ulcer                                       | 14.1 (908)                                   | (7.8) 333                                | <0.05              |
| <b>Comorbidity</b>                          | 9.9 (858)                                    | (2.3) 36                                 | <0.05              |
| <b>BMI categories</b>                       |                                              |                                          |                    |
| Underweight                                 | 1.7 (149)                                    | 0.5 (22)                                 |                    |
| Normal                                      | 40.0 (3,463)                                 | 44.9 (2,169)                             | <0.05              |
| Overweight                                  | 42.3 (3,659)                                 | 43.5 (2,094)                             |                    |
| Obesity                                     | 15.9 (1,378)                                 | 11.1 (533)                               |                    |
| <b>WC categories</b>                        |                                              |                                          |                    |
| Normal                                      | 39.0 (1,784)                                 | 45 (765)                                 |                    |
| Moderately high                             | 29.7 (1,356)                                 | 32.6 (554)                               | <0.05              |
| High                                        | 31.3 (1,434)                                 | 22.4 (381)                               |                    |

Values are percentage (number); P value:  $\chi^2$  test for categorical variables P value: <sup>a</sup>Student's t-test; <sup>b</sup>including asthma/chronic bronchitis/emphysema; <sup>c</sup>including angina pectoris/myocardial infarction. BMI, body mass index; WC, waist circumference.

**BMI categories**Underweight: <18.5 kg/m<sup>2</sup>Normal: 18.5–24.9 kg/m<sup>2</sup>Overweight: 25.0–29.9 kg/m<sup>2</sup>Obesity: ≥30 kg/m<sup>2</sup>**WC categories**

Normal: men ≤94 cm; women ≤80 cm

Moderately high: men 95–102 cm; women 81–88 cm

High: men &gt;102 cm; women &gt;88 cm

**Supplementary Table 4 Longitudinal association between BMI and WC, and pre-frailty/frailty among individuals with information on all five frailty criteria: The Tromsø Study 1994–2016**

|                              | Frailty status    |                            | Model 1           | Model 2           |
|------------------------------|-------------------|----------------------------|-------------------|-------------------|
|                              | Robust<br>(%) (n) | Pre-frail/frail<br>(%) (n) | OR (95% CI)       | OR (95% CI)       |
|                              | 70.4% (2016)      | 29.6% (848)                |                   |                   |
| <b>BMI, kg/m<sup>2</sup></b> |                   |                            |                   |                   |
| Underweight                  | 0.4 (8)           | 0.7 (6)                    | 1.98 (0.67–5.84)  | 0.97 (0.28–3.23)  |
| Normal                       | 48.4 (976)        | 40.1 (340)                 | Ref.              | Ref.              |
| Overweight                   | 42.8 (862)        | 42.9 (364)                 | 1.19 (0.99–1.42)  | 1.18 (0.97–1.43)  |
| Obesity                      | 8.4 (170)         | 16.3 (168)                 | 2.36 (1.82–3.05)  | 2.28 (1.72–3.01)  |
| <b>WC, cm</b>                | n = 600           | n = 350                    |                   |                   |
| Normal                       | 53.3 (320)        | 40.9 (143)                 | Ref.              | Ref.              |
| Moderately high              | 31.3 (188)        | 34.0 (119)                 | 1.40 (1.03–1.90)* | 1.50 (1.08–2.08)* |
| High                         | 15.3 (92)         | 25.1 (88)                  | 2.15 (1.51–3.08)* | 2.15 (1.46–3.18)* |

Model 1: adjusted for age and sex (\*excluding sex) at baseline.

Model 2: adjusted for age, sex, educational level, marital/cohabitation status, smoking status, alcohol intake, social support, self-perceived health, and physical activity level (\*excluding sex) at baseline.

BMI, body mass index; CI, confidence interval; OR, odds ratio; WC, waist circumference.

**Supplementary Table 5 Cross-sectional association between BMI and WC, and pre-frailty/frailty: The Tromsø Study 2015–2016**

|                              | Frailty status    |                            | Model 1           | Model 2           |
|------------------------------|-------------------|----------------------------|-------------------|-------------------|
|                              | Robust<br>(%) (n) | Pre-frail/frail<br>(%) (n) | OR (95% CI)       | OR (95% CI)       |
|                              | 70.5 (3179)       | 29.5 (1330)                |                   |                   |
| <b>BMI, kg/m<sup>2</sup></b> |                   |                            |                   |                   |
| Underweight                  | 0.5 (17)          | 1.4 (18)                   | 2.93 (1.48–5.83)  | 2.32 (1.09–4.94)  |
| Normal                       | 30.0 (951)        | 24.5 (323)                 | Ref.              | Ref.              |
| Overweight                   | 49.4 (1,566)      | 41.4 (547)                 | 1.07 (0.91–1.26)  | 1.03 (0.86–1.23)  |
| Obesity                      | 20.1 (639)        | 32.7 (432)                 | 2.14 (1.79–2.56)  | 1.88 (1.54–2.30)  |
| <b>WC, cm</b>                |                   |                            |                   |                   |
| Normal                       | 22.6 (716)        | 17.1 (225)                 | Ref.              | Ref.              |
| Moderately high              | 28.0 (888)        | 21.3 (281)                 | 1.02 (0.83–1.25)* | 1.01 (0.81–1.26)* |
| High                         | 49.4 (1,569)      | 61.6 (812)                 | 1.69 (1.42–2.01)* | 1.45 (1.20–1.76)* |

Model 1: minimally adjusted for age and sex (\*excluding sex) at Tromsø7.

Model 2: adjusted for age, sex, educational level, smoking status, alcohol intake, comorbidities, social support, and self-perceived health (\*excluding sex) at Tromsø7.

BMI, body mass index; CI, confidence interval; OR, odds ratio; WC, waist circumference.

1  
2  
3  
4  
5  
6  
7  
8  
9  
10  
11  
12  
13  
14  
15  
16  
17  
18  
19  
20  
21  
22  
23  
24  
25  
26  
27  
28  
29  
30  
31  
32  
33  
34  
35  
36  
37  
38  
39  
40  
41  
42  
43  
44  
45  
46  
47  
48  
49  
50  
51  
52  
53  
54  
55  
56  
57  
58  
59  
60

**SUPPLEMENTARY FIGURES**

For peer review only



Supplementary Figure 1 Trajectories of individuals with repeated body mass index measurements between Tromsø4 and Tromsø7: The Tromsø Study 1994–2016.

(n = 1,391)

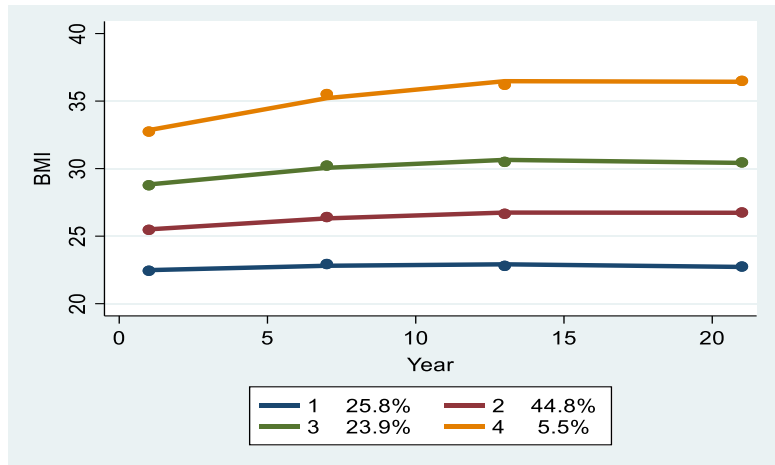

|         |                       |       |
|---------|-----------------------|-------|
| Group 1 | Stable normal weight  | 25.8% |
| Group 2 | Stable overweight     | 44.8% |
| Group 3 | Overweight to obesity | 23.9% |
| Group 4 | Increasing obesity    | 5.5%  |

Supplementary Figure 2 Trajectories of individuals with repeated waist circumference measurements between Tromsø4 and Tromsø7: The Tromsø Study 1994–2016.

(Males: n = 731; females n = 660)

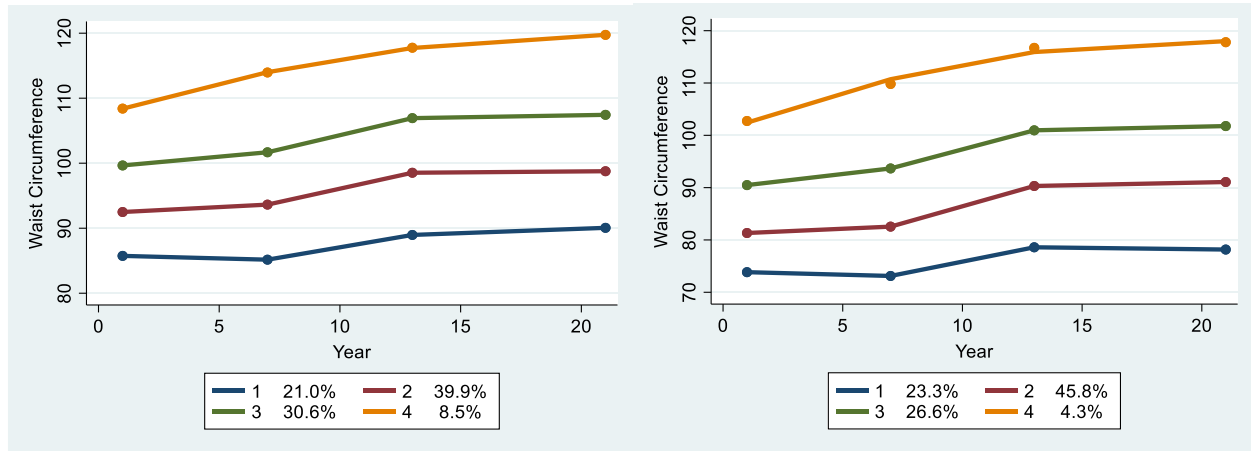

| Male    |                            |        |
|---------|----------------------------|--------|
| Group 1 | Stable normal WC           | 21.00% |
| Group 2 | Stable moderately high WC  | 39.90% |
| Group 3 | Moderately high to high WC | 30.60% |
| Group 4 | Increasing high WC         | 8.5 %  |

| Female  |                              |        |
|---------|------------------------------|--------|
| Group 1 | Stable normal WC             | 23.30% |
| Group 2 | Moderately high to high WC   | 45.80% |
| Group 3 | Gradually increasing high WC | 26.60% |
| Group 4 | Steeply increasing high WC   | 4.30%  |

## 1 Research checklist

2  
3  
4  
5  
6  
7  
8  
9  
10  
11  
12  
13  
14  
15  
16  
17  
18  
19  
20  
21  
22  
23  
24  
25  
26  
27  
28  
29  
30  
31  
32  
33  
34  
35  
36  
37  
38  
39  
40  
41  
42  
43  
44  
45  
46  
47  
48  
49  
50  
51  
52  
53  
54  
55  
56  
57  
58  
59  
60

|                              | Item No | Content covered                                                                                                                                                                                                                                                                                                        | Page No   |
|------------------------------|---------|------------------------------------------------------------------------------------------------------------------------------------------------------------------------------------------------------------------------------------------------------------------------------------------------------------------------|-----------|
| <b>Title and abstract</b>    | 1       | (a) Indicate the study's design with a commonly used term in the title or the abstract<br>(b) Provide in the abstract an informative and balanced summary of what was done and what was found                                                                                                                          | √ (1-2)   |
| <b>Introduction</b>          |         |                                                                                                                                                                                                                                                                                                                        |           |
| Background/rationale         | 2       | Explain the scientific background and rationale for the investigation being reported                                                                                                                                                                                                                                   | √ (3)     |
| Objectives                   | 3       | State specific objectives, including any pre-specified hypotheses                                                                                                                                                                                                                                                      | √ (3)     |
| <b>Methods</b>               |         |                                                                                                                                                                                                                                                                                                                        |           |
| Study design                 | 4       | Present key elements of study design early in the paper                                                                                                                                                                                                                                                                | √ (4)     |
| Setting                      | 5       | Describe the setting, locations, and relevant dates, including periods of recruitment, exposure, follow-up, and data collection                                                                                                                                                                                        | √ (4)     |
| Participants                 | 6       | (a) Give the eligibility criteria, and the sources and methods of selection of participants. Describe methods of follow-up<br>(b) For matched studies, give matching criteria and number of exposed and unexposed<br>(c) Flow chart explaining inclusion and exclusion of participants                                 | √ (4)     |
| Variables                    | 7       | Clearly define all outcomes, exposures, predictors, potential confounders, and effect modifiers. Give diagnostic criteria, if applicable                                                                                                                                                                               | √ (4,5,6) |
| Data sources/<br>measurement | 8       | For each variable of interest, give sources of data and details of methods of assessment (measurement). Describe comparability of assessment methods if there is more than one group                                                                                                                                   | √ (4,5)   |
| Bias                         | 9       | Describe any efforts to address potential sources of bias                                                                                                                                                                                                                                                              | √ (6)     |
| Study size                   | 10      | Explain how the study size was arrived at                                                                                                                                                                                                                                                                              | √ (4)     |
| Quantitative variables       | 11      | Explain how quantitative variables were handled in the analyses. If applicable, describe which groupings were chosen and why                                                                                                                                                                                           | √ (4,5,6) |
| Statistical methods          | 12      | (a) Describe all statistical methods, including those used to control for confounding<br>(b) Describe any methods used to examine subgroups and interactions<br>(c) Explain how missing data were addressed<br>(d) If applicable, explain how loss to follow-up was addressed<br>(e) Describe any sensitivity analyses | √ (6)     |
| <b>Results</b>               |         |                                                                                                                                                                                                                                                                                                                        |           |
| Participants                 | 13      | (a) Information on participants                                                                                                                                                                                                                                                                                        | √ (4)     |
| Descriptive data             | 14      | (a) Give characteristics of study participants (eg demographic, clinical, social) and information on exposures and potential confounders<br>(b) Indicate number of participants with missing data for each variable of interest<br>(c) Summarise follow-up time (eg, average and total amount)                         | √ (7, 8)  |
| Outcome data                 | 15      | Report numbers of outcome events or summary measures over time                                                                                                                                                                                                                                                         | √ (8-11)  |

|    |                          |    |                                                                                                                                                                                                              |           |
|----|--------------------------|----|--------------------------------------------------------------------------------------------------------------------------------------------------------------------------------------------------------------|-----------|
| 1  | Main results             | 16 | (a) Give unadjusted estimates and, if applicable, confounder-adjusted estimates and their precision (eg, 95% confidence interval). Make clear which confounders were adjusted for and why they were included | √ (9-11)  |
| 2  |                          |    | (b) Report category boundaries when continuous variables were categorized                                                                                                                                    |           |
| 3  |                          |    | (c) If relevant, consider translating estimates of relative risk into absolute risk for a meaningful time period                                                                                             |           |
| 4  |                          |    |                                                                                                                                                                                                              |           |
| 5  |                          |    |                                                                                                                                                                                                              |           |
| 6  |                          |    |                                                                                                                                                                                                              |           |
| 7  |                          |    |                                                                                                                                                                                                              |           |
| 8  |                          |    |                                                                                                                                                                                                              |           |
| 9  | Other analyses           | 17 | Report other analyses done—eg analyses of subgroups and interactions, and sensitivity analyses                                                                                                               | √ (9-11)  |
| 10 |                          |    |                                                                                                                                                                                                              |           |
| 11 | <b>Discussion</b>        |    |                                                                                                                                                                                                              |           |
| 12 |                          |    |                                                                                                                                                                                                              |           |
| 13 | Key results              | 18 | Summarise key results with reference to study objectives                                                                                                                                                     | √ (11)    |
| 14 | Limitations              | 19 | Discuss limitations of the study, taking into account sources of potential bias or imprecision. Discuss both direction and magnitude of any potential bias                                                   | √ (13)    |
| 15 |                          |    |                                                                                                                                                                                                              |           |
| 16 | Interpretation           | 20 | Give a cautious overall interpretation of results considering objectives, limitations, multiplicity of analyses, results from similar studies, and other relevant evidence                                   | √ (11-14) |
| 17 |                          |    |                                                                                                                                                                                                              |           |
| 18 |                          |    |                                                                                                                                                                                                              |           |
| 19 | Generalisability         | 21 | Discuss the generalisability (external validity) of the study results                                                                                                                                        | √ (13-14) |
| 20 |                          |    |                                                                                                                                                                                                              |           |
| 21 | <b>Other information</b> |    |                                                                                                                                                                                                              |           |
| 22 | Funding                  | 22 | Give the source of funding and the role of the funders for the present study and, if applicable, for the original study on which the present article is based                                                | √ (15)    |
| 23 |                          |    |                                                                                                                                                                                                              |           |
| 24 |                          |    |                                                                                                                                                                                                              |           |
| 25 |                          |    |                                                                                                                                                                                                              |           |
| 26 |                          |    |                                                                                                                                                                                                              |           |
| 27 |                          |    |                                                                                                                                                                                                              |           |
| 28 |                          |    |                                                                                                                                                                                                              |           |
| 29 |                          |    |                                                                                                                                                                                                              |           |
| 30 |                          |    |                                                                                                                                                                                                              |           |
| 31 |                          |    |                                                                                                                                                                                                              |           |
| 32 |                          |    |                                                                                                                                                                                                              |           |
| 33 |                          |    |                                                                                                                                                                                                              |           |
| 34 |                          |    |                                                                                                                                                                                                              |           |
| 35 |                          |    |                                                                                                                                                                                                              |           |
| 36 |                          |    |                                                                                                                                                                                                              |           |
| 37 |                          |    |                                                                                                                                                                                                              |           |
| 38 |                          |    |                                                                                                                                                                                                              |           |
| 39 |                          |    |                                                                                                                                                                                                              |           |
| 40 |                          |    |                                                                                                                                                                                                              |           |
| 41 |                          |    |                                                                                                                                                                                                              |           |
| 42 |                          |    |                                                                                                                                                                                                              |           |
| 43 |                          |    |                                                                                                                                                                                                              |           |
| 44 |                          |    |                                                                                                                                                                                                              |           |
| 45 |                          |    |                                                                                                                                                                                                              |           |
| 46 |                          |    |                                                                                                                                                                                                              |           |
| 47 |                          |    |                                                                                                                                                                                                              |           |
| 48 |                          |    |                                                                                                                                                                                                              |           |
| 49 |                          |    |                                                                                                                                                                                                              |           |
| 50 |                          |    |                                                                                                                                                                                                              |           |
| 51 |                          |    |                                                                                                                                                                                                              |           |
| 52 |                          |    |                                                                                                                                                                                                              |           |
| 53 |                          |    |                                                                                                                                                                                                              |           |
| 54 |                          |    |                                                                                                                                                                                                              |           |
| 55 |                          |    |                                                                                                                                                                                                              |           |
| 56 |                          |    |                                                                                                                                                                                                              |           |
| 57 |                          |    |                                                                                                                                                                                                              |           |
| 58 |                          |    |                                                                                                                                                                                                              |           |
| 59 |                          |    |                                                                                                                                                                                                              |           |
| 60 |                          |    |                                                                                                                                                                                                              |           |

# BMJ Open

## Body mass index and waist circumference as predictors of pre-frailty/frailty: The Tromsø study 1994–2016

|                                 |                                                                                                                                                                                                                                                                                           |
|---------------------------------|-------------------------------------------------------------------------------------------------------------------------------------------------------------------------------------------------------------------------------------------------------------------------------------------|
| Journal:                        | <i>BMJ Open</i>                                                                                                                                                                                                                                                                           |
| Manuscript ID                   | bmjopen-2022-065707.R1                                                                                                                                                                                                                                                                    |
| Article Type:                   | Original research                                                                                                                                                                                                                                                                         |
| Date Submitted by the Author:   | 10-Oct-2022                                                                                                                                                                                                                                                                               |
| Complete List of Authors:       | Uchai, Shreeshti; University of Oslo, Department of Nutrition<br>Andersen, Lene; University of Oslo, Department of Nutrition<br>Hopstock, Laila ; UiT The Arctic University of Norway, Department of Community Medicine<br>Hjartaker, Anette; University of Oslo, Department of Nutrition |
| <b>Primary Subject Heading</b>: | Epidemiology                                                                                                                                                                                                                                                                              |
| Secondary Subject Heading:      | Nutrition and metabolism, Public health                                                                                                                                                                                                                                                   |
| Keywords:                       | NUTRITION & DIETETICS, PUBLIC HEALTH, EPIDEMIOLOGY                                                                                                                                                                                                                                        |
|                                 |                                                                                                                                                                                                                                                                                           |

SCHOLARONE™  
Manuscripts

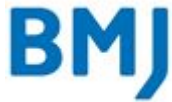

I, the Submitting Author has the right to grant and does grant on behalf of all authors of the Work (as defined in the below author licence), an exclusive licence and/or a non-exclusive licence for contributions from authors who are: i) UK Crown employees; ii) where BMJ has agreed a CC-BY licence shall apply, and/or iii) in accordance with the terms applicable for US Federal Government officers or employees acting as part of their official duties; on a worldwide, perpetual, irrevocable, royalty-free basis to BMJ Publishing Group Ltd ("BMJ") its licensees and where the relevant Journal is co-owned by BMJ to the co-owners of the Journal, to publish the Work in this journal and any other BMJ products and to exploit all rights, as set out in our [licence](#).

The Submitting Author accepts and understands that any supply made under these terms is made by BMJ to the Submitting Author unless you are acting as an employee on behalf of your employer or a postgraduate student of an affiliated institution which is paying any applicable article publishing charge ("APC") for Open Access articles. Where the Submitting Author wishes to make the Work available on an Open Access basis (and intends to pay the relevant APC), the terms of reuse of such Open Access shall be governed by a Creative Commons licence – details of these licences and which [Creative Commons](#) licence will apply to this Work are set out in our licence referred to above.

Other than as permitted in any relevant BMJ Author's Self Archiving Policies, I confirm this Work has not been accepted for publication elsewhere, is not being considered for publication elsewhere and does not duplicate material already published. I confirm all authors consent to publication of this Work and authorise the granting of this licence.

1  
2  
3 1 **Body mass index and waist circumference as predictors of pre-frailty/frailty:**  
4 2 **The Tromsø study 1994–2016**  
5 3  
6  
7

8  
9 4 Shreeshti Uchai<sup>1</sup>, Lene Frost Andersen<sup>1</sup>, Laila Arnesdatter Hopstock<sup>2</sup>, and Anette Hjartåker<sup>1</sup>

10 5 <sup>1</sup>Department of Nutrition, Institute of Basic Medical Sciences, University of Oslo, Norway

11 6 <sup>2</sup>Department of Community Medicine, UiT The Arctic University of Norway, Tromsø, Norway  
12  
13  
14 7  
15 8  
16  
17 9  
18

19 10 **Correspondence to:** Shreeshti Uchai, Department of Nutrition, Institute of Basic Medical Sciences, University of Oslo, Norway,  
20 11 Postbox: 1046, Blindern, 0317 Oslo, [shreeshti.uchai@medisin.uio.no](mailto:shreeshti.uchai@medisin.uio.no)  
21 12  
22  
23 13  
24 14  
25 15  
26  
27  
28 16  
29  
30 17  
31  
32 18  
33  
34 19  
35 20  
36  
37 21  
38  
39 22  
40  
41 23  
42 24  
43  
44 25  
45  
46 26  
47  
48 27  
49  
50 28  
51  
52 29  
53  
54 30  
55 31

**Keywords:** body mass index, frailty, obesity, pre-frailty, waist circumference

## 1 Abstract

2 **Objective:** This study investigated the association between obesity, assessed using body mass index (BMI)  
3 and waist circumference (WC), and pre-frailty/frailty among older adults over 21 years of follow-up.

4 **Design:** Prospective cohort study.

5 **Setting:** Population-based study among community-dwelling adults in Tromsø municipality, Norway.

6 **Participants:** 2340 women and 2169 men aged  $\geq 45$  years attending the Tromsø Study in 1994–1995  
7 (Tromsø4) and 2015–2016 (Tromsø7), with additional BMI and WC measurements in 2001 (Tromsø5) and  
8 2007–2008 (Tromsø6).

9 **Primary outcome measure:** Physical frailty was defined as the presence of 3 or more and pre-frailty as the  
10 presence of 1–2 of the five frailty components suggested by Fried et al.: low grip strength, slow walking  
11 speed, exhaustion, unintentional weight loss and low physical activity.

12 **Results:** Participants with baseline obesity (adjusted odds ratio [OR] 2.41, 95% confidence interval [CI]  
13 1.93–3.02), assessed by BMI, were more likely to be pre-frail/frail than those with normal BMI. Participants  
14 with high (OR 2.14, 95% CI 1.59–2.87) or moderately high (OR 1.57, 95% CI 1.21–2.03) baseline WC  
15 were more likely to be pre-frail/frail than those with normal WC. Those at baseline with normal BMI but  
16 moderately high/high WC or overweight with normal WC had no significantly increased odds for pre-  
17 frailty/frailty. However, those with both obesity and moderately high/high WC had increased odds of pre-  
18 frailty/frailty. Higher odds of pre-frailty/frailty was observed among those in "overweight to obesity" or  
19 "increasing obesity" trajectories than those with stable normal BMI. Compared with participants in a stable  
20 normal WC trajectory, those with high WC throughout follow-up were more likely to be pre-frail/frail.

21 **Conclusion:** Both general and abdominal obesity, especially over time during adulthood, is associated with  
22 an increased risk of pre-frailty/frailty in later years. Thus maintaining normal BMI and WC throughout adult  
23 life is important.

### 24 Strengths and limitations of this study:

- 25 1. This study has a long follow-up period of 21 years.
- 26 2. This study takes into account changes in body mass index (BMI) and waist circumference (WC)  
27 occurring through the follow-up period.
- 28 3. Frailty status was defined using a slightly modified version of Fried's physical frailty criteria.
- 29 4. Frailty and pre-frailty were combined as one outcome.
- 30 5. Information on frailty was only available at follow-up.



## 1 Background

2 Frailty is a dynamic multifactorial geriatric syndrome characterised by physiological deterioration,  
3 increased vulnerability and decreased resilience toward external stressors.[1,2] Frailty is associated with an  
4 increased risk of adverse events such as falls, disability, hospitalisation, reduced quality of life, and  
5 mortality.[1,2] It is preceded by pre-frailty, a multidimensional, transitional risk state.[3,4] Fried's frailty  
6 phenotype identifies pre-frailty as the presence of one or two and frailty as three or more of the five criteria:  
7 unintentional weight loss, self-reported exhaustion, weakness, slow walking speed, and low physical  
8 activity.[5] The prevalence of frailty and pre-frailty, defined using Fried's physical frailty measure,[5]  
9 among community-dwelling people aged  $\geq 50$  years across 62 countries, has been estimated to be 12% and  
10 46%, respectively.[6]

11 Rapid population ageing has become a global phenomenon.[7] Ageing is typically associated with changes  
12 in body composition, such as decreased muscle mass and redistribution of total and regional fat.[8–10]  
13 Underweight older adults with minimal reserve capacity are at risk of adverse health outcomes[5,11], and  
14 unintentional weight loss is commonly acknowledged as a significant frailty indicator.[5] However, a  
15 growing body of evidence also suggests a positive association between obesity among older adults and the  
16 risk of frailty.[10,12–16] Obesity aggravates the age-related decline in muscle strength, aerobic capacity,  
17 and physical functionality, thus worsening health and well-being.[10,11,14,17,18] It is also closely  
18 associated with metabolic disorders, inflammaging and oxidative stress, all of which have been suggested  
19 to contribute to the risk of frailty.[14,19]

20 Anthropometric measures, including body mass index (BMI) and waist circumference (WC), are simple,  
21 cost-effective tools that reflect an individual's body composition and nutritional status. They are one of the  
22 widely used nutritional items for detecting frailty.[20] BMI indicates general obesity, while WC indicates  
23 abdominal obesity. When used together, they effectively assess obesity-related risks at the population level.  
24 [21–23] Some studies have detected a U-shaped association between BMI and frailty.[13,15,24] Midlife  
25 overweight and obesity, assessed by BMI, have been associated with the risk of pre-frailty and frailty in  
26 older age.[25,26] Similarly, a positive association between high WC and frailty among older adults has been  
27 observed in some studies.[9,16,27–29] These findings are even more relevant in the present context, where  
28 obesity prevalence is increasing across all age groups, posing a global public health challenge.[30]

29 Though the evidence is expanding, there have been limited longitudinal studies exploring and comparing  
30 the relationship of both BMI and WC with the risk of developing pre-frailty and frailty over a long follow-  
31 up period.[29] Few have explored changes in BMI[31,32] and its association with frailty, while studies that  
32 consider changes in WC in association with the development of frailty seem to be lacking. Therefore, the

1 present study aimed to investigate the association of BMI and WC, separately and concurrently, with the  
2 risk of pre-frailty/frailty after 21 years of follow-up. Additionally, this study assessed changes in BMI and  
3 WC through the follow-up period and their association with pre-frailty/frailty.

## 4 **Methods**

### 5 **The Tromsø study**

6 This study uses data from the Tromsø study, an ongoing population-based study in the Tromsø municipality,  
7 Norway, consisting of seven surveys: Tromsø1 (1974), Tromsø2 (1979–1980), Tromsø3 (1986–1987),  
8 Tromsø4 (1994–1995), Tromsø5 (2001), Tromsø6 (2007–2008), and Tromsø7 (2015–2016). More than  
9 45,000 women and men have participated in at least one of the surveys.[33] The earlier surveys (Tromsø1-  
10 Tromsø3) did not include WC measurements. Therefore, the present study uses data from Tromsø4  
11 (baseline) to Tromsø7 (follow-up). Tromsø4 included 27,158 participants aged 25–97 years, Tromsø5,  
12 8,130 participants aged 30–89 years, Tromsø6, 12,984 participants aged 30–87 years, and Tromsø7, 21,083  
13 participants aged 40–99 years. The detailed information on the recruitment and the attendance of the  
14 participants has been described elsewhere.[33]

### 15 **Study sample**

16 The present study included Tromsø4 participants aged  $\geq 45$  years with valid information on BMI who also  
17 attended Tromsø7, i.e., 21 years of follow-up ( $n = 4,809$ ). Participants with missing information on three or  
18 more frailty indicators in Tromsø7 were excluded (Figure 1). Our primary analytical sample had 4,509  
19 participants. Out of these, 1,534 participants had information on WC at Tromsø4, and 1,391 had repeated  
20 measurements on both BMI and WC between Tromsø4 and Tromsø7.

### 21 **Exposure**

22 Bodyweight in kilograms and height in metres were measured wearing light clothes and no footwear. WC  
23 was measured using tape to the nearest centimetre at the umbilical level. All measurements were performed  
24 by trained personnel. BMI was calculated as the weight divided by the square of the height ( $\text{kg}/\text{m}^2$ ) and  
25 categorised as underweight ( $< 18.5 \text{ kg}/\text{m}^2$ ), normal ( $18.5\text{--}24.9 \text{ kg}/\text{m}^2$ ), overweight ( $25.0\text{--}29.9 \text{ kg}/\text{m}^2$ ), and  
26 obesity ( $\geq 30.0 \text{ kg}/\text{m}^2$ ) according to the World Health Organization (WHO) criteria.[34] WC was categorised  
27 as normal (men  $\leq 94$  cm, women  $\leq 80$  cm), moderately high (men 95–102 cm, women 81–88 cm), and high  
28 (men  $> 102$  cm, women  $> 88$  cm) according to WHO.[35]

## 1 Frailty assessment

2 A modified version of Fried et al.'s frailty phenotype[5] was used to operationalise frailty in Tromsø7.  
3 Frailty was not operationalised at baseline as complete information on frailty indicators was unavailable.

4 Five indicators were assessed at follow-up (Supplementary Table 1):

- 5 1. Unintentional weight loss: Self-reported involuntary weight loss during the last six months.[36]
- 6 2. Exhaustion: Response "pretty much" or "very much" to the question: "During the last week, have  
7 you experienced that everything is a struggle?" from the Hopkins' Symptom Checklist-10.[37]
- 8 3. Walking speed: Short Physical Performance Battery test, [38,39] where the fastest time out of two  
9 walks was selected and converted to seconds per 15 feet from seconds per 4 meters. Sex- and height-  
10 adjusted cut-offs, according to Fried et al.,[5] were used to identify participants with a low walking  
11 speed.
- 12 4. Weakness: Grip strength was measured using a newly calibrated Jamar+ Digital Dynamometer  
13 (Patterson Medical, Warrenville, IL, USA) following the Southampton protocol procedures.[40]  
14 Sex- and BMI-specific cut-offs suggested by Fried et al. [5] were used to identify participants with  
15 low grip strength.
- 16 5. Low physical activity: Response "Reading, watching TV/screen or other sedentary activity" to the  
17 question: "Describe your exercise and physical exertion in leisure time over the last year" from the  
18 Saltin–Grimby Physical Activity Level Scale for leisure-time physical activity.[41]

19 Participants were categorised as robust (0), pre-frail (1-2) and frail ( $\geq 3$ ) based on the number of frailty  
20 indicators present.

## 21 Covariates

22 The potential covariates in this study were selected based on the existing knowledge and literature on frailty  
23 status. Sociodemographic characteristics included age, sex, educational level [primary/partly secondary  
24 education (up to 10 years of schooling), upper secondary education (minimum of 3 years), college/university  
25 short (<4 years), and college/university long ( $\geq 4$  years)], and marital/cohabitation status (married/cohabiting  
26 or single/not cohabiting with a partner). Self-reported smoking status was categorised as current, former, or  
27 never smoker. Self-reported alcohol intake level was categorised as never-drinker, infrequent drinker (<2–  
28 4 times/month), and frequent drinker (>2–3 times/week). Comorbidity was defined using Charlson's  
29 comorbidity index[42] without weighting of the diseases. It was categorised as "no comorbidity" and  
30 "comorbidity" based on the self-reported presence of coronary heart disease (angina pectoris/myocardial  
31 infarction), stroke, diabetes, cancer, pulmonary disease (asthma/chronic bronchitis/emphysema), and peptic  
32 ulcer. Social support was categorised as self-reported "not enough good friends" or "enough good friends."

1 Self-perceived health status was categorised as "poor" or "good." Baseline physical activity level was  
2 categorised as no/low physical activity (0 hours/week spent in hard physical activity or  $\leq 2$  hours/week spent  
3 in light physical activity) and high physical activity ( $\geq 1$  hour/week in hard physical activity or  $\geq 3$   
4 hours/week in light physical activity).

## 5 **Statistical analysis**

6 The sociodemographic and lifestyle factors at baseline across robust and pre-frail/frail groups were  
7 described using mean and standard deviation for continuous variables and proportion and count for  
8 categorical variables. The differences between the two groups were tested using the student's *t*-test for  
9 continuous variables and the chi-square test for categorical variables.

10 Multivariable logistic regression analysis was used to assess the effect of BMI and WC on pre-frailty/frailty  
11 at follow-up. Five different longitudinal associations were assessed: baseline BMI and pre-frailty/frailty;  
12 baseline WC and pre-frailty/frailty; joint BMI and WC profile at baseline and pre-frailty/frailty; BMI  
13 trajectories and pre-frailty/frailty; WC trajectories and pre-frailty/frailty. The models were minimally  
14 adjusted for age and sex (Model 1) and further adjusted for educational level, marital/cohabitation status,  
15 smoking status, alcohol intake, social support, self-perceived health, and physical activity level at baseline  
16 (Model 2). The adjustment variables were selected using a stepwise backward regression procedure. No  
17 significant collinearity or interaction was detected between covariates in the model.

18 Group-based trajectory modelling (GBTM) was conducted among 1,391 participants to assess changes in  
19 the BMI and WC throughout the 21-year follow-up period, with measurements on both BMI and WC  
20 available at Tromsø4, Tromsø5, Tromsø6 and Tromsø7. GBTM, also known as latent class growth analysis,  
21 is a semi-parametric technique that identifies distinct subgroups of individuals following a similar pattern  
22 of change over time on a given variable, using finite mixtures of defined probability distributions.[43]  
23 Different models with varying numbers of trajectory groups, varying functional forms and orders were  
24 compared. The most appropriate model was selected based on the Bayesian Information Criterion[44] and  
25 then introduced into longitudinal multivariable logistic regression models. The distinct BMI and WC  
26 trajectories were named based on their observed pattern. The WC trajectories were sex-stratified due to  
27 varying cut-off levels for men and women.

28 A new variable with five distinct strata (normal BMI and normal WC; normal BMI and moderately  
29 high/high WC; overweight and low WC; overweight and moderately high/high WC; obesity and moderately  
30 high/high WC) was formed by combining different categories of BMI and WC. They were then introduced  
31 into the multivariable models to assess the concurrent effects of BMI and WC on frailty status. While

1 forming the new joint variable, the underweight group was removed because of low prevalence (<1%), and  
2 moderately high and high WC groups were combined because of their low sample size when stratified.

3 Additional supplementary analyses were carried out. The cross-sectional association between BMI and WC  
4 level and frailty status at Tromsø7 was assessed. Since pre-frailty/frailty could not be assessed at baseline,  
5 the primary longitudinal analyses were repeated in a sub-population ( $n= 4,050$ ), excluding participants aged  
6 60 years and older at Tromsø4 who might have had an increased probability of being pre-frail/frail at that  
7 time point. The majority of the participants in the pre-frail/frail group had a frailty score of 1. In order to  
8 account for potential misclassification, analyses were performed on a further restricted sub-sample with a  
9 frailty score  $\geq 2$  at Tromsø7 ( $n= 3,124$ ). The primary longitudinal analyses were also repeated among the  
10 subgroup of participants with non-missing information on all five frailty components ( $n = 2,864$ ), and the  
11 association of obesity with each frailty component were assessed.

12 All the statistical analyses were conducted using STATA 16.[45] Statistical significance was set at  $P < 0.05$ .  
13 The results are expressed as adjusted odds ratios (ORs) with 95% confidence intervals (CIs).

## 14 Patient and public involvement

15 Patients and the public were not involved in this research's design, conduct, reporting, or dissemination  
16 plans.

## 17 Results

### 18 Study population

19 The mean age at baseline was 51.6 years, and the participants were followed up for 21 years. 28.4% of the  
20 participants were pre-frail, 1.1% were frail, and 70.5% were robust at follow-up (Table 1). In total, 50.6%  
21 of the robust group and 55.0% of the pre-frail/frail group were women. Most robust and pre-frail/frail  
22 participants were either married or cohabiting (84.3% and 80.3%) and reported having enough good friends  
23 (83.1% and 80.5%) at baseline. All the baseline characteristics, except comorbidity, were significantly  
24 different in the robust and the pre-frail/frail groups (Table 1).

25 When assessed at follow-up, all the sociodemographic, lifestyle and disease-related factors were  
26 significantly associated with pre-frailty/frailty (Supplementary Table 2). When the eligible participants lost  
27 to follow-up ( $n = 8,649$ ) were compared with the attendees, they were found to be older (mean age 63.2  
28 years) with a less healthy lifestyle and higher comorbidities (Supplementary Table 3).

## 1 BMI and WC

2 At baseline, the proportion of individuals with underweight was low (<1%) (Table 2). The proportion of  
 3 individuals with normal BMI was higher among the robust group than the pre-frail/frail group (47.6% versus  
 4 39.3%), whereas the proportion of individuals with obesity was higher among the pre-frail/frail group  
 5 (17.1% versus 8.4%). The robust group had a higher proportion of individuals with normal WC than the  
 6 pre-frail/frail group (51.5% versus 37.3%), whereas the pre-frail/frail group had a higher proportion of  
 7 individuals with high WC (27.7% versus 17.4%). A similar distribution of different BMI and WC categories  
 8 across robust and pre-frail/frail groups was observed at follow-up (Supplementary Table 2). Both robust  
 9 and pre-frail/frail groups at follow-up had an increased proportion of individuals with obesity and high WC  
 10 compared with baseline (Table 2; Supplementary Table 2).

11 **Table 1 Baseline characteristics of participants by frailty status at follow-up: The Tromsø Study 1994–2016**

|                                             | Frailty status                    |                                            | P value            |
|---------------------------------------------|-----------------------------------|--------------------------------------------|--------------------|
|                                             | Robust<br>(% (n))<br>70.5 (3,179) | Pre-frail/frail<br>(% (n))<br>29.5 (1,330) |                    |
| Age in years, mean (SD)                     | 51.1 (5.1)                        | 52.8 (5.9)                                 | 0.000 <sup>a</sup> |
| <b>Women</b>                                | 50.6 (1,608)                      | 55.0 (732)                                 | 0.006              |
| <b>Smoking status</b>                       |                                   |                                            |                    |
| Current smokers                             | 27.0 (858)                        | 33.7 (448)                                 |                    |
| Former smokers                              | 36.1 (1,149)                      | 34.0 (452)                                 | 0.001              |
| Never                                       | 36.9 (1,172)                      | 32.3 (430)                                 |                    |
| <b>High physical activity level</b>         | 69.5 (2,210)                      | 56.9 (756)                                 | 0.001              |
| <b>Married or cohabiting</b>                | 84.3 (2,679)                      | 80.3 (1,068)                               | 0.001              |
| <b>Self-perceived health – good</b>         | 75.4 (2,394)                      | 61.5 (818)                                 | <0.001             |
| <b>Social support – enough good friends</b> | 83.1 (2,404)                      | 80.5 (976)                                 | 0.041              |
| <b>Educational level</b>                    |                                   |                                            |                    |
| Primary/Partly secondary                    | 32.8 (1,041)                      | 42.4 (562)                                 |                    |
| Upper secondary                             | 34.3 (1,085)                      | 34.2 (453)                                 | <0.001             |
| College/University short                    | 16.5 (524)                        | 12.8 (169)                                 |                    |
| College/University long                     | 16.4 (520)                        | 10.6 (141)                                 |                    |
| <b>Alcohol intake</b>                       |                                   |                                            |                    |
| Never/Abstaining                            | 9.0 (286)                         | 11.9 (158)                                 |                    |
| Infrequent drinker                          | 76.2 (2,419)                      | 76.6 (1,015)                               | <0.001             |
| Frequent drinker                            | 14.8 (468)                        | 11.5 (152)                                 |                    |
| <b>Prevalent diseases</b>                   |                                   |                                            |                    |
| Pulmonary disease <sup>b</sup>              | 8.6 (272)                         | 9.5 (126)                                  | 0.323              |
| Coronary heart disease <sup>c</sup>         | 2.3 (73)                          | 4.5 (59)                                   | <0.001             |
| Diabetes                                    | 0.4 (12)                          | 0.6 (8)                                    | 0.300              |
| Cancer                                      | 2.8 (79)                          | 3.5 (42)                                   | 0.210              |
| Stroke                                      | 0.6 (19)                          | 0.8 (11)                                   | 0.386              |
| Peptic ulcer                                | 7.0 (197)                         | 8.9 (105)                                  | 0.033              |
| <b>Comorbidity</b>                          | 1.9 (59)                          | 2.7 (36)                                   | 0.070              |

Values are percentages (numbers); P value:  $\chi^2$  test for categorical variables; P value: <sup>a</sup>Student's t-test; <sup>b</sup>including asthma/chronic bronchitis/emphysema; <sup>c</sup>including angina pectoris/myocardial infarction.



1 When BMI and WC level was assessed jointly at baseline (Table 3), the robust group had a higher proportion  
 2 of individuals with both BMI and WC in the normal range than the pre-frail/frail group (36.1% versus  
 3 29.1%). The proportion of individuals with both obesity and moderately high/ high WC was higher among  
 4 the pre-frail/frail group (16.9% versus 7.4%).

5 The GBTM resulted in four distinct trajectories of BMI ( $n = 1391$ ): stable normal BMI (25.8%), stable  
 6 overweight (44.8%), overweight to obesity (23.9%), and increasing obesity (5.5%) (Supplementary Figure  
 7 1). The increasing obesity trajectory included individuals with BMI  $\geq 30$  kg/m<sup>2</sup> at baseline, which kept  
 8 increasing to a higher obesity level, i.e., BMI  $\geq 35$  kg/m<sup>2</sup>. Four distinct WC trajectories were identified for  
 9 both women ( $n = 660$ ) and men ( $n = 731$ ) (Supplementary Figure 2). The WC trajectories for women were:  
 10 stable normal WC (23.3%), moderately high to high WC (45.8%), gradually increasing high WC (26.6%),  
 11 and steeply increasing high WC (4.3%). The WC trajectories for men were: stable normal WC (21.0%),  
 12 stable moderately high WC (39.9%), moderately high to high WC (30.6%), and increasing high WC (8.5%).

### 13 BMI, WC, and pre-frailty/frailty

14 Individuals who had obesity (OR 2.41, 95% CI 1.93–3.02) or overweight (OR 1.19, 95% CI 1.02–1.39) at  
 15 baseline had significantly higher odds of becoming pre-frail/frail at follow-up compared with individuals  
 16 with normal BMI (Model 2, Table 2). No statistically significant association was detected between  
 17 underweight group and the odds of pre-frailty/frailty; however, the number of underweight individuals was  
 18 insufficient to reach any conclusion. Participants with moderately high WC (OR 1.57, 95% CI 1.21–2.03)  
 19 or high WC (OR 2.16, 95% CI 1.59–2.87) at baseline had higher odds of becoming pre-frail/frail at follow-  
 20 up compared to individuals with a normal WC (Model 2, Table 2).

21 The supplementary cross-sectional analysis (Supplementary Table 4) indicated a significant association  
 22 between obesity and pre-frailty/frailty among older adults (OR 1.88, 95% CI 1.54–2.30), whereas no  
 23 association was detected between overweight and pre-frailty/frailty. As for WC, only high WC was  
 24 associated with increased odds of pre-frailty/frailty (OR 1.45, 95% CI 1.20–1.76) in the cross-sectional  
 25 analysis.

26 **Table 2 Longitudinal association between BMI and WC, and pre-frailty/frailty: The Tromsø Study 1994–2016**

|                        | Frailty status    |                            |                        |                        |
|------------------------|-------------------|----------------------------|------------------------|------------------------|
|                        | Robust<br>(% (n)) | Pre-frail/frail<br>(% (n)) | Model 1<br>OR (95% CI) | Model 2<br>OR (95% CI) |
| BMI, kg/m <sup>2</sup> | 70.5 (3179)       | 29.5 (1330)                |                        |                        |
| Underweight            | 0.3 (11)          | 0.7 (9)                    | 2.15 (0.88–5.29)       | 1.32 (0.49–3.54)       |

|                 |                |                |                   |                   |
|-----------------|----------------|----------------|-------------------|-------------------|
| Normal          | 47.6 (1,513)   | 39.3 (522)     | Ref.              | Ref.              |
| Overweight      | 43.7 (1,388)   | 43.0 (572)     | 1.18 (1.02–1.36)  | 1.19 (1.02–1.39)  |
| Obesity         | 8.4 (267)      | 17.0 (227)     | 2.42 (1.98–2.98)  | 2.41 (1.93–3.02)  |
| <b>WC, cm</b>   | <i>n</i> = 952 | <i>n</i> = 582 |                   |                   |
| Normal          | 51.5 (490)     | 37.3 (217)     | Ref.              | Ref.              |
| Moderately high | 31.1 (296)     | 35.0 (204)     | 1.54 (1.21–1.96)* | 1.57 (1.21–2.03)* |
| High            | 17.4 (166)     | 27.7 (161)     | 2.16 (1.65–2.83)* | 2.14 (1.59–2.87)* |

Model 1: adjusted for age and sex (\*excluding sex) at baseline.

Model 2: adjusted for age, sex, educational level, marital/cohabitation status, smoking status, alcohol intake, social support, self-perceived health, and physical activity level (\*excluding sex) at baseline.

BMI, body mass index; CI, confidence interval; OR: odds ratio; WC, waist circumference.

**BMI categories**

Underweight: <18.5 kg/m<sup>2</sup>

Normal: 18.5–24.9 kg/m<sup>2</sup>

Overweight: 25.0–29.9 kg/m<sup>2</sup>

Obesity: ≥30 kg/m<sup>2</sup>

**WC categories**

Normal: men ≤94 cm; women ≤80 cm

Moderately high: men 95–102 cm; women 81–88 cm

High: men >102 cm; women >88 cm

The longitudinal model that included joint BMI and WC profile at baseline showed that participants who had overweight with moderately high/high WC (OR 1.48, 95% CI 1.11–1.98) or participants who had obesity with moderately high/high WC (OR 3.11, 95% CI 2.07–4.70) had higher odds of being pre-frail/frail compared with participants with normal BMI and normal WC (Model 2, Table 3). No significant association with pre-frailty/frailty was detected among participants who had normal BMI with moderately high/high WC or overweight with normal WC at baseline.

The sensitivity analyses restricted to participants with baseline age <60 years (Supplementary Table 5) and further restricted to those with a frailty score ≥2 at follow-up (Supplementary Table 6) confirmed the higher odds of pre-frailty/frailty among participants with baseline obesity and/or moderately high/high WC. However, no significant association was detected between participants in overweight category and pre-frailty/frailty. The sensitivity analysis among participants with complete information on all five frailty components (Supplementary Table 7) also generated similar results.

**Table 3 Association between combined BMI and WC profiles, and pre-frailty/frailty: The Tromsø Study 1994–2016**

|                                        | Frailty status    |                            | Model 1<br>OR (95% CI) | Model 2<br>OR (95% CI) |
|----------------------------------------|-------------------|----------------------------|------------------------|------------------------|
|                                        | Robust<br>(% (n)) | Pre-frail/frail<br>(% (n)) |                        |                        |
| <b>Longitudinal</b>                    |                   |                            |                        |                        |
| <b>BMI and WC profile, baseline</b>    | 62.8 (870)        | 37.2 (515)                 |                        |                        |
| Normal BMI and normal WC               | 36.1 (314)        | 29.1 (150)                 | Ref.                   | Ref.                   |
| Normal BMI and moderately high/high WC | 8.4 (73)          | 8.0 (41)                   | 1.13 (0.73–1.74)       | 1.01 (0.63–1.61)       |
| Overweight and normal WC               | 15.9 (139)        | 9.5 (49)                   | 0.74 (0.50–1.08)       | 0.79 (0.53–1.19)       |
| Overweight and moderately high/high WC | 32.2 (280)        | 36.5 (188)                 | 1.40 (1.07–1.84)       | 1.48 (1.11–1.98)       |
| Obesity and moderately high/high WC    | 7.4 (64)          | 16.9 (87)                  | 2.86 (1.96–4.18)       | 3.11 (2.07–4.70)       |

Model 1: adjusted for age at baseline.

Model 2: adjusted for age, educational level, marital/cohabitation status, smoking status, alcohol intake, social support, self-perceived health, and physical activity level at baseline.



BMI, body mass index; CI, confidence interval; OR: odds ratio; WC, waist circumference.

The model with BMI trajectories (Model 2, Table 4) indicated higher odds of pre-frailty/frailty among participants in the overweight to obesity trajectory (OR 1.67, 95% CI 1.19–2.35) or those in the constantly increasing obesity trajectory (OR 3.12, 95% CI 1.80–5.41), compared with those in the stable normal BMI trajectory. Contrarily, there was no significant association in the stable overweight category. The model with WC trajectories (Model 2, Table 4) showed that women in the gradually increasing high WC trajectory (OR 2.17, 95% CI 1.32–3.59) or the steeply increasing high WC trajectory (OR 4.09, 95% CI 1.54–10.90) had higher odds of being pre-frail/frail compared with women in the normal WC trajectory. Similarly, men in the increasing high WC trajectory (OR 3.36, 95% CI 1.71–6.59) had higher odds of pre-frailty/frailty compared with men in the normal WC trajectory. The same trend in the association between different BMI and WC trajectories and pre-frailty/frailty was observed in sensitivity analyses restricted to participants with baseline age <60 years (Supplementary Table 5).

When the association was assessed separately for each frailty component (Supplementary Table 8), overweight or obesity at baseline was associated with higher odds of slow walking speed, low physical activity and low grip strength at follow-up. However, the association between BMI and grip strength was no longer significant in the fully adjusted model. Moderately high or high WC at baseline was associated with higher odds of slow walking speed and low physical activity.

**Table 4 Association between BMI and WC trajectories and pre-frailty/frailty: The Tromsø study 1994–2016**

|                                | Frailty status    |                            | Model 1           | Model 2            |
|--------------------------------|-------------------|----------------------------|-------------------|--------------------|
|                                | Robust<br>(% (n)) | Pre-frail/frail<br>(% (n)) | OR (95% CI)       | OR (95% CI)        |
|                                | 62.8 (874)        | 37.2 (517)                 |                   |                    |
| <b>BMI trajectories</b>        |                   |                            |                   |                    |
| Stable normal BMI              | 27.8 (243)        | 22.4 (116)                 | Ref.              | Ref.               |
| Stable overweight              | 46.6 (407)        | 42.4 (219)                 | 1.20 (0.91–1.59)  | 1.21 (0.90–1.62)   |
| Overweight to obese            | 21.8 (191)        | 26.5 (137)                 | 1.62 (1.18–2.22)  | 1.67 (1.19–2.35)   |
| Increasing obesity             | 3.8 (33)          | 8.7 (45)                   | 3.07 (1.85–5.09)  | 3.12 (1.80–5.41)   |
|                                | 59.4 (392)        | 40.6 (268)                 |                   |                    |
| <b>WC trajectories (women)</b> |                   |                            |                   |                    |
| Stable normal WC               | 26.3 (103)        | 17.5 (47)                  | Ref.              | Ref.               |
| Moderately high to high WC     | 49.7 (195)        | 42.5 (114)                 | 1.27 (0.84–1.94)* | 1.30 (0.83–2.05)*  |
| Gradually increasing high WC   | 20.9 (82)         | 33.6 (90)                  | 2.34 (1.47–3.70)* | 2.17 (1.32–3.59)*  |
| Steeply increasing high WC     | 3.1 (13)          | 6.3 (17)                   | 3.04 (1.34–6.90)* | 4.09 (1.54–10.90)* |
|                                | 65.9 (482)        | 34.1 (249)                 |                   |                    |
| <b>WC trajectories (men)</b>   |                   |                            |                   |                    |
| Stable normal WC               | 22.4 (108)        | 18.1 (45)                  | Ref.              | Ref.               |
| Stable moderately high WC      | 41.1 (198)        | 38.5 (96)                  | 1.18 (0.77–1.80)* | 1.12 (0.72–1.76)*  |
| Moderately high to high WC     | 31.5 (152)        | 28.9 (72)                  | 1.18 (0.75–1.85)* | 1.12 (0.69–1.79)*  |
| Increasing high WC             | 5.0 (24)          | 14.5 (36)                  | 3.73 (1.99–6.97)* | 3.36 (1.71–6.59)*  |

Model 1: adjusted for age and sex at baseline (\*adjusted for age only).

Model 2: adjusted for age, sex, educational level, marital/cohabitation status, smoking status, alcohol intake, social support, self-perceived health, and physical activity level (\*excluding sex) at baseline.  
BMI, body mass index; CI, confidence interval; OR: odds ratio; WC, waist circumference.

---

## 1 Discussion

2 The present study followed 4,509 community-dwelling participants from the population-based Tromsø  
3 Study from 1994 to 2016 to examine the association between general and abdominal obesity and the risk of  
4 frailty. This study suggests an increased likelihood of pre-frailty/frailty among those with baseline obesity.  
5 Increased likelihood of pre-frailty/frailty was also observed among those with high or moderately high WC  
6 at baseline. When assessed jointly, participants with both obesity and moderately high/high WC at baseline  
7 had increased odds of being pre-frail/frail compared to those with BMI and WC in the normal range.  
8 Participants in the "overweight to obesity" or the "increasing obesity" trajectories had increased odds of pre-  
9 frailty/frailty compared with those in the stable normal BMI trajectory. Additionally, participants with a  
10 high WC at baseline, whose WC gradually or steeply increased throughout the follow-up period, had  
11 increased odds of being pre-frail/frail compared with those in a stable normal WC trajectory.

12 Our conclusions align with the findings from two previous longitudinal studies with a similar follow-up  
13 period (26 and 22 years) that reported a significant positive association between midlife overweight or  
14 obesity and the development of pre-frailty and frailty in later life.[25,26] However, we should be cautious  
15 while interpreting the association between baseline overweight BMI and pre-frailty/frailty. In our study, this  
16 association was not significant in the sensitivity analyses where we excluded participants aged 60 years and  
17 older at baseline. A prospective study with a follow-up period of 3.5 years observed a significantly increased  
18 risk of frailty among underweight women and women with overweight and obesity.[24] No significant  
19 association between baseline underweight status and risk of pre-frailty/frailty was detected in our study.  
20 However, the number of underweight individuals in our study was too low, resulting in a low statistical  
21 power to reach any conclusion. In terms of WC and frailty status, similar to our results, a positive association  
22 between higher WC and frailty among older adults was reported by a 3.5-year follow-up study from two  
23 prospective Spanish cohorts.[29] A positive association between high WC and frailty was observed in a few  
24 other studies;[9,16,27] however, they were cross-sectional and used slightly different cut-offs to categorise  
25 WC. We identified BMI and WC trajectories to account for the dynamic change in the adiposity level that  
26 might occur during adulthood. In line with our findings regarding BMI trajectories, comparable trajectories  
27 and observations about a higher risk of pre-frailty and frailty among those with increasing BMI were  
28 observed in a 26-year follow-up study.[32] A large study that followed adults aged  $\geq 51$  years for ten years  
29 reported a higher incidence of frailty among weight gain class, weight loss class, and consistent obesity  
30 class.[31] Literature on long-term changes in WC and its association with frailty seems lacking. Few

1 epidemiological studies have explored the combined effect of BMI and WC on frailty among older adults.  
2 Two studies conducted among adults aged  $\geq 65$  years in Portugal[46] and  $\geq 60$  years in Spain[29] observed  
3 a positive association between frailty and adiposity only when the individuals had both a high WC and a  
4 high BMI. It aligns with our results to a certain extent, as we observed an increased likelihood of pre-  
5 frailty/frailty among individuals with both obesity and moderately high/high WC at baseline. We also  
6 observed higher odds of pre-frailty/frailty among those who had overweight with a moderately high/high  
7 WC at baseline. However, this association was not significant in the sensitivity analyses where we excluded  
8 participants aged 60 years and older at baseline. On the contrary, high WC was reported to be associated  
9 with frailty regardless of their BMI categories by two cross-sectional studies conducted among community-  
10 dwelling adults aged  $\geq 65$  years in China[27] and England,[15] indicating WC to be better linked with frailty.  
11 Notably, participants who had normal BMI with moderately high/high WC or those who had overweight  
12 with normal WC did not have significantly increased odds of pre-frailty/frailty in our study. This finding  
13 indicates the importance of considering both BMI and WC to identify the risk of frailty.

14 There are different mechanisms through which obesity might contribute to pre-frailty/frailty. Increased  
15 adiposity leads to increased secretion of pro-inflammatory adipokines, thus contributing to  
16 inflammation,[14,19] which is also associated with frailty among older adults.[47] Obesity leads to  
17 increased fat mass and increased lipid infiltration in muscle fibres resulting in reduced muscle strength and  
18 function.[14,48] When coupled with an age-related decline in muscle mass and strength, it causes  
19 "sarcopenic obesity", which is linked to an increased risk of frailty and disability.[19,49,50] Grip strength,  
20 often used as a proxy for muscle strength in older adults, was found to be associated with baseline  
21 overweight and obesity assessed using BMI in our study. However, the association was no longer significant  
22 when further adjusted for potential covariates. Slow walking speed and low physical activity, which often  
23 represent lower physical functioning at an older age, were significantly associated with baseline BMI and  
24 WC. The primary strength of this study is its prospective design with a long follow-up period of two decades.  
25 However, several changes in participant's lifestyle, diet, habits, and physical and psycho-social  
26 environments might have occurred during this period. We could not account for these factors, which  
27 potentially impacted the development of pre-frailty/frailty. So, the result of this study should be cautiously  
28 interpreted in light of these contextual issues. We used BMI and WC to define general and abdominal  
29 obesity. BMI is often criticised for its inability to provide information on fat distribution,[22] while WC is  
30 criticised for its limitation in distinguishing between visceral and subcutaneous fat.[51] However, they are  
31 effective in assessing obesity-related risks at the population level.[21,22] A study among Tromsø7  
32 participants aged  $\geq 40$  years found a strong correlation between BMI and visceral adipose tissue (VAT) mass  
33 and WC and VAT mass. It also concluded them to be a satisfactory substitute to identify cardiometabolic  
34 risk.[23] Further, they are simple to measure, easy to replicate, and widely used in routine health

1  
2  
3 1 assessments, thus, helping identify individuals at risk of frailty to provide timely interventions. The repeated  
4 2 measures on BMI and WC allowed us to account for changes in participants' obesity status through the  
5 3 follow-up period and gain a comprehensive understanding of the long-term effects of these exposures on  
6 4 the risk of frailty in later life. However, we could not account for the development and change in frailty  
7 5 status that might have occurred over time as repeated measures on frailty were unavailable. Our outcome  
8 6 was physical frailty, assessed using Fried et al.'s frailty phenotype definition.[5] Though widely used,[52]  
9 7 it defines frailty from the unidimensional perspective of reduced physical functioning and declining  
10 8 physiological reserves. In the context where frailty is being recognised as a multidimensional construct  
11 9 encompassing not just physical but also cognitive, social and psychological dimensions [53], the scope of  
12 10 our results focusing just on physical aspects of frailty might be limited. This study's objectively measured  
13 11 physical frailty components (low grip strength and low walking speed) aligned with Fried's definition;  
14 12 however, the questionnaires for self-reported components (exhaustion, low physical activity and  
15 13 unintentional weight loss) varied slightly. Each frailty indicator we utilised has been validated in different  
16 14 research contexts.[36–38,41] The self-reported frailty components are nevertheless prone to information  
17 15 bias. A systematic review that investigated 262 physical frailty phenotypes acknowledged that modifications  
18 16 in the definition of frailty phenotype are common and have an important impact on the classification and  
19 17 predictive ability of the definition.[54] A fair agreement has been reported between Fried's definition and  
20 18 the completely questionnaire-based physical frailty definition.[55,56]

21 19 The main limitation of our study is the selection bias resulting from differential loss to follow-up. Those  
22 20 lost to follow-up were comparatively older and had a higher proportion of general and abdominal obesity  
23 21 and other potential risk factors for frailty. This might have led to a lower prevalence of frailty in Tromsø7.  
24 22 In total, 1.1% of the participants aged  $\geq 66$  years at Tromsø7 were frail, and 28.4% were pre-frail which is  
25 23 much lower than the pooled prevalence estimates provided by O'Caomh et al.[6] It aligns with the findings  
26 24 from a study where the grip strengths of Tromsø7 participants and Russian Know Your Heart study  
27 25 participants aged 40-69 years were compared. The average Norwegian participant had a mean grip strength  
28 26 comparable to a seven-year younger Russian counterpart.[57] This indicates that the nordic population  
29 27 might be comparatively healthier,[58] thus limiting the generalisability of our findings to other populations  
30 28 across the globe. Only a sub-sample of our study population had information on both BMI and WC, and an  
31 29 even lower number had repeated measurements available for both exposures. Therefore, the models  
32 30 including both BMI and WC might have low statistical power, particularly when considering the repeated  
33 31 measures. Information on frailty measures was not available at baseline. However, most participants were  
34 32 in their mid-life (median age 50) at baseline, lowering their likelihood of having frailty components. The  
35 33 sensitivity analyses, where we excluded participants aged  $\geq 60$  years from baseline as a proxy for exclusion  
36 34 of pre-frail/frail individuals, showed a similar trend in the association between baseline obesity, assessed

1  
2  
3 1 using BMI and WC, and pre-frailty/frailty at an older age. We adjusted for several confounding factors;  
4 2 however, the potential for residual confounding remains. Most covariates in our study, including  
5 3 comorbidity, were self-reported.  
6  
7

8 4 We combined pre-frailty and frailty as a single outcome because of the low frailty prevalence in this study.  
9 5 The pre-frail/frail population in this study is primarily pre-frail with a frailty score of 1, half of which were  
10 6 the ones with low physical activity. So, misclassification of comparatively healthier but less active  
11 7 participants with severely pre-frail/frail participants might have occurred. The sensitivity analyses on  
12 8 participants with  $\geq 2$  frailty score, which mostly supported results from the primary analysis, addressed this  
13 9 issue to some extent. It would have been informative to assess the association with pre-frailty and frailty  
14 10 separately. Nevertheless, understanding factors associated with pre-frailty is highly relevant because pre-  
15 11 frailty is gaining broader interest as an ideal opportunity for administering timely intervention to delay or  
16 12 reverse frailty and the associated adverse outcomes.[59] Of note, as our outcome pre-frailty/frailty is  
17 13 common, the OR estimates obtained might slightly overestimate the relative risk, and caution should be  
18 14 applied while interpreting it as a risk.  
19  
20  
21  
22  
23  
24  
25  
26

27 15 In the context where the population is rapidly ageing and the obesity epidemic is rising, growing evidence  
28 16 recognises the subgroup of "fat and frail" older individuals in contrast to viewing frailty only as a wasting  
29 17 disorder.[12,15,26] In this study, participants with both high BMI and high WC, i.e., general and abdominal  
30 18 obesity, especially for a long duration throughout their adulthood, were observed to have an increased  
31 19 likelihood of pre-frailty/frailty. It highlights the importance of routinely assessing and maintaining optimal  
32 20 BMI and WC throughout adulthood to lower the risk of frailty in older age.  
33  
34  
35  
36  
37  
38  
39  
40  
41  
42  
43  
44  
45  
46  
47  
48  
49  
50  
51  
52  
53  
54  
55  
56  
57  
58  
59  
60

## 1 Funding

2 This work was supported by the Throne Holst Foundation (Grant number N/A) and the Institute of Basic  
3 Medical Sciences, University of Oslo (Grant number N/A). The project also received funding from  
4 Aktieselskabet Freia Chocolate Fabriks Medisinske fond (Grant number N/A). The funders had no role in  
5 the research manuscript's design, conduct, analysis, interpretation, or drafting.

## 6 Acknowledgements

7 We thank the NutriFrail team for their support and the Tromsø Study team for their cooperation in data  
8 acquisition.

## 9 Competing Interest

10 None declared.

## 11 Ethical approval

12 The Tromsø Study was approved by the Regional Committee of Medical and Health Research Ethics (REK)  
13 North and the Norwegian Data Protection Authority. Approvals from REK (ref. 2021/234146) and the  
14 Norwegian Centre for Research Data (NSD) (ref. 364331) were obtained for this particular study.

## 15 Contributions

16 SU was responsible for conceptualisation, data acquisition, analysis, interpretation, writing original draft,  
17 review and editing; LFA was responsible for conceptualisation, funding acquisition, supervision, writing  
18 critical review and editing; LAH was responsible for data acquisition for the Tromsø Study, constant  
19 coordination, writing critical review and editing; AH was responsible for conceptualisation, funding  
20 acquisition, data acquisition, supervision, writing critical review and editing.

## 21 Data availability statement

22 The legal restriction on data availability is set by the Tromsø Study Data and Publication Committee in  
23 order to control for data sharing, including publication of datasets with the potential of reverse identification  
24 of de-identified sensitive participant information. The data can be made available from the Tromsø Study  
25 upon application to the Tromsø Study Data and Publication Committee. Contact information: The Tromsø  
26 Study, Department of Community Medicine, Faculty of Health Sciences, UiT The Arctic University of  
27 Norway; e-mail: [tromsous@uit.no](mailto:tromsous@uit.no) <<mailto:tromsous@uit.no>>.

## 28 Patient consent for publication

29 Not required



## 1 References

- 2 1 Kojima G, Iliffe S, Jivraj S, et al. Association between frailty and quality of life among  
3 community-dwelling older people: a systematic review and meta-analysis. *J Epidemiol Community*  
4 *Health* 2016;70:716–21. doi:10.1136/jech-2015-206717
- 5 2 Conroy S, Elliott A. The frailty syndrome. *Med (United Kingdom)* 2017;45:15–8.  
6 doi:10.1016/j.mpmed.2016.10.010
- 7 3 Sezgin D, O'Donovan M, Woo J, et al. Early identification of frailty: Developing an international  
8 delphi consensus on pre-frailty. *Arch Gerontol Geriatr* 2022;99:104586.  
9 doi:10.1016/j.archger.2021.104586
- 10 4 Sezgin D, Liew A, O'Donovan MR, et al. Pre-frailty as a multi-dimensional construct: A  
11 systematic review of definitions in the scientific literature. *Geriatr Nurs (Minneap)* 2020;41:139–  
12 46. doi:10.1016/j.gerinurse.2019.08.004
- 13 5 Fried LP, Tangen CM, Walston J, et al. Frailty in older adults: evidence for a phenotype. *J*  
14 *Gerontol A Biol Sci Med Sci* 2001;56:M146–56. doi:10.1093/gerona/56.3.m146
- 15 6 O'Caoimh R, Sezgin D, O'Donovan MR, et al. Prevalence of frailty in 62 countries across the  
16 world: a systematic review and meta-analysis of population-level studies. *Age Ageing* 2021;50:96–  
17 104. doi:10.1093/ageing/afaa219
- 18 7 United Nations Department of Economic and Social Affairs. World Population Ageing 2019. 2020.
- 19 8 Reinders I, Visser M, Schaap L. Body weight and body composition in old age and their  
20 relationship with frailty. *Curr Opin Clin Nutr Metab Care* 2017;20:11–5.  
21 doi:10.1097/MCO.0000000000000332
- 22 9 Xu L, Zhang J, Shen S, et al. Association Between Body Composition and Frailty in Elder  
23 Inpatients. *Clin Interv Aging* 2020;Volume 15:313–20. doi:10.2147/CIA.S243211
- 24 10 Villareal DT, Apovian CM, Kushner RF, et al. Obesity in Older Adults: Technical Review and  
25 Position Statement of the American Society for Nutrition and NAASO, The Obesity Society. *Obes*  
26 *Res* 2005;13:1849–63. doi:10.1038/oby.2005.228
- 27 11 Bowen ME. The Relationship Between Body Weight, Frailty, and the Disablement Process.

- 1  
2  
3 1 *Journals Gerontol Ser B Psychol Sci Soc Sci* 2012;67:618–26. doi:10.1093/geronb/gbs067  
4  
5  
6 2 12 Blaum CS, Xue QL, Michelon E, et al. The Association Between Obesity and the Frailty  
7 3 Syndrome in Older Women: The Women’s Health and Aging Studies. *J Am Geriatr Soc*  
8 4 2005;53:927–34. doi:10.1111/j.1532-5415.2005.53300.x  
9  
10  
11 5 13 Rietman ML, van der a DL, van Oostrom SH, et al. The Association Between BMI and Different  
12 6 Frailty Domains: A U-Shaped Curve? *J Nutr Heal Aging* 2018;22:8–15. doi:10.1007/s12603-016-  
13 7 0854-3  
14  
15  
16  
17 8 14 Porter Starr KN, McDonald SR, Bales CW. Obesity and physical frailty in older adults: A scoping  
18 9 review of lifestyle intervention trials. *J Am Med Dir Assoc* 2014;15:240–50.  
19 10 doi:10.1016/j.jamda.2013.11.008  
20  
21  
22  
23 11 15 Hubbard RE, Lang IA, Llewellyn DJ, et al. Frailty, Body Mass Index, and Abdominal Obesity in  
24 12 Older People. *Journals Gerontol Ser A Biol Sci Med Sci* 2010;65A:377–81.  
25 13 doi:10.1093/gerona/glp186  
26  
27  
28  
29 14 16 Crow RS, Lohman MC, Titus AJ, et al. Association of Obesity and Frailty in Older Adults:  
30 15 NHANES 1999–2004. *J Nutr Health Aging* 2019;23:138–44. doi:10.1007/s12603-018-1138-x  
31  
32  
33 16 17 Himes CL. Obesity, disease, and functional limitation in later life. *Demography* 2000;37:73–82.  
34 17 doi:10.2307/2648097  
35  
36  
37 18 18 Bales CW, Buhr G. Is obesity bad for older persons? A systematic review of the pros and cons of  
38 19 weight reduction in later life. *J Am Med Dir Assoc* 2008;9:302–12.  
39 20 doi:10.1016/j.jamda.2008.01.006  
40  
41  
42  
43 21 19 Jarosz PA, Bellar A. Sarcopenic obesity: an emerging cause of frailty in older adults. *Geriatr Nurs*  
44 22 2009;30:64–70. doi:10.1016/j.gerinurse.2008.02.010  
45  
46  
47 23 20 Zupo R, Castellana F, Bortone I, et al. Nutritional domains in frailty tools: Working towards an  
48 24 operational definition of nutritional frailty. *Ageing Res Rev* 2020;64:101148.  
49 25 doi:10.1016/j.arr.2020.101148  
50  
51  
52  
53 26 21 Liu X, Huang Y, Lo K, et al. Quotient of Waist Circumference and Body Mass Index: A Valuable  
54 27 Indicator for the High-Risk Phenotype of Obesity. *Front Endocrinol (Lausanne)* 2021;12:1–10.  
55 28 doi:10.3389/fendo.2021.697437  
56  
57  
58  
59  
60



- 1  
2  
3 1 22 Cornier MA, Després JP, Davis N, et al. Assessing adiposity: A scientific statement from the  
4 American heart association. *Circulation* 2011;124:1996–2019.  
5 2  
6 3 doi:10.1161/CIR.0b013e318233bc6a  
7  
8  
9 4 23 Lundblad MW, Jacobsen BK, Johansson J, et al. Anthropometric measures are satisfactory  
10 substitutes for the DXA-derived visceral adipose tissue in the association with cardiometabolic  
11 risk-The Tromsø Study 2015-2016. doi:10.1002/osp4.517  
12 6  
13  
14 7 24 Woods NF, LaCroix AZ, Gray SL, et al. Frailty: emergence and consequences in women aged 65  
15 and older in the Women’s Health Initiative Observational Study. *J Am Geriatr Soc* 2005;53:1321–  
16 8  
17 30. doi:10.1111/j.1532-5415.2005.53405.x  
18 9  
19  
20 10 25 Stenholm S, Strandberg TE, Pitkälä K, et al. Midlife obesity and risk of frailty in old age during a  
21 22-year follow-up in men and women: The mini-Finland follow-up survey. *Journals Gerontol - Ser*  
22 11  
23 *A Biol Sci Med Sci* 2014;69:73–8. doi:10.1093/gerona/glt052  
24 12  
25  
26 13 26 Strandberg TE, Sirola J, Pitkälä KH, et al. Association of midlife obesity and cardiovascular risk  
27 with old age frailty: A 26-year follow-up of initially healthy men. *Int J Obes* 2012;36:1153–7.  
28 14  
29 15 doi:10.1038/ijo.2012.83  
30  
31  
32 16 27 Liao Q, Zheng Z, Xiu S, et al. Waist circumference is a better predictor of risk for frailty than BMI  
33 17  
34 in the community-dwelling elderly in Beijing. *Aging Clin Exp Res* 2018;30:1319–25.  
35 18  
36 doi:10.1007/s40520-018-0933-x  
37  
38 19 28 Falsarella G, Gasparotto LPR, Barcelos CC, et al. Body composition as a frailty marker for the  
39 20  
40 elderly community. *Clin Interv Aging* 2015;10:1661. doi:10.2147/CIA.S84632  
41  
42 21 29 García-Esquinas E, José García-García F, León-Muñoz LM, et al. Obesity, fat distribution, and risk  
43 22  
44 of frailty in two population-based cohorts of older adults in Spain. *Obesity* 2015;23:847–55.  
45 23  
46 doi:10.1002/oby.21013  
47  
48 24 30 Malenfant JH, Batsis JA. Obesity in the geriatric population – a global health perspective. *J Glob*  
49 25  
50 *Heal Reports* 2019;3. doi:10.29392/joghr.3.e2019045  
51  
52 26 31 Mezuk B, Lohman MC, Rock AK, et al. Trajectories of body mass indices and development of  
53 27  
54 frailty: Evidence from the health and retirement study. *Obesity* 2016;24:1643–7.  
55 28  
56 doi:10.1002/oby.21572  
57  
58  
59  
60

- 1  
2  
3 1 32 Landré B, Czernichow S, Goldberg M, et al. Association Between Life-Course Obesity and Frailty  
4 in Older Adults: Findings in the GAZEL Cohort. *Obesity (Silver Spring)* 2020;28:388–96.  
5 2  
6 3 doi:10.1002/oby.22682  
7  
8  
9 4 33 UiT. The Arctic University of Norway. The Tromsø Study | UiT.  
10 5  
11 https://uit.no/research/tromsostudy (accessed 29 Jan 2022).  
12  
13 6 34 World Health Organisation (WHO). Obesity : preventing and managing the global epidemic :  
14 report of a WHO consultation (WHO technical report series ; 894). 2000.  
15 7  
16 8 https://apps.who.int/iris/handle/10665/42330  
17  
18  
19 9 35 World Health Organisation (WHO). Waist Circumference and Waist–Hip Ratio. Report of a WHO  
20 Expert Consultation. Geneva, 8-11 December 2008. Geneva: 2008.  
21 10  
22 11 http://apps.who.int/iris/bitstream/handle/10665/44583/9789241501491\_eng.pdf?sequence=1  
23  
24 12 36 Elia M. The ‘MUST’ report. Nutritional screening of adults: a multidisciplinary responsibility.  
25 13  
26 14 Development and use of the ‘Malnutrition Universal Screening Tool’ (MUST) for adults. BAPEN  
27 14  
28 2003.  
29  
30 15 37 Derogatis LR, Lipman RS, Rickels K, et al. The Hopkins Symptom Checklist (HSCL): a self-  
31 report symptom inventory. *Behav Sci* 1974;19:1–15. doi:10.1002/bs.3830190102  
32 16  
33  
34 17 38 Bergland A, Strand BH. Norwegian reference values for the Short Physical Performance Battery  
35 (SPPB): the Tromsø Study. *BMC Geriatr* 2019;19:216. doi:10.1186/s12877-019-1234-8  
36 18  
37  
38 19 39 Freiburger E, de Vreede P, Schoene D, et al. Performance-based physical function in older  
39 community-dwelling persons: a systematic review of instruments. *Age Ageing* 2012;41:712–21.  
40 20  
41 21 doi:10.1093/ageing/afs099  
42  
43  
44 22 40 Roberts HC, Denison HJ, Martin HJ, et al. A review of the measurement of grip strength in clinical  
45 and epidemiological studies: Towards a standardised approach. *Age Ageing* 2011;40:423–9.  
46 23  
47 24 doi:10.1093/ageing/afr051  
48  
49  
50 25 41 Grimby G, Börjesson M, Jonsdottir IH, et al. The ‘Saltin-Grimby Physical Activity Level Scale’  
51 and its application to health research. *Scand J Med Sci Sports* 2015;25 Suppl 4:119–25.  
52 26  
53 27 doi:10.1111/sms.12611  
54  
55  
56 28 42 Charlson ME, Pompei P, Ales KL, et al. A new method of classifying prognostic comorbidity in

- 1  
2  
3 1 longitudinal studies: development and validation. *J Chronic Dis* 1987;40:373–83.  
4 2 doi:10.1016/0021-9681(87)90171-8  
5  
6  
7 3 43 De Rubeis V, Andreacchi AT, Sharpe I, et al. Group-based trajectory modeling of body mass index  
8 4 and body size over the life course: A scoping review. *Obes Sci Pract* 2021;7:100–28.  
9 5 doi:10.1002/osp4.456  
10  
11  
12  
13 6 44 Jones BL, Nagin DS. A Note on a Stata Plugin for Estimating Group-based Trajectory Models.  
14 7 *Sociol Methods Res* 2013;42:608–13. doi:10.1177/0049124113503141  
15  
16  
17 8 45 StataCorp. Stata Statistical Software: Release 16. College Station, TX: Stata Corp LLC, 2019.  
18  
19  
20 9 46 Afonso C, Sousa-Santos AR, Santos A, et al. Frailty status is related to general and abdominal  
21 10 obesity in older adults. *Nutr Res* 2021;85:21–30. doi:10.1016/j.nutres.2020.10.009  
22  
23  
24 11 47 Soysal P, Stubbs B, Lucato P, et al. Inflammation and frailty in the elderly: A systematic review  
25 12 and meta-analysis. *Ageing Res Rev* 2016;31:1–8. doi:10.1016/J.ARR.2016.08.006  
26  
27  
28 13 48 Goodpaster BH, Theriault R, Watkins SC, et al. Intramuscular lipid content is increased in obesity  
29 14 and decreased by weight loss. *Metabolism* 2000;49:467–72. doi:10.1016/s0026-0495(00)80010-4  
30  
31  
32 15 49 Villareal DT, Banks M, Siener C, et al. Physical frailty and body composition in obese elderly men  
33 16 and women. *Obes Res* 2004;12:913–20. doi:10.1038/oby.2004.111  
34  
35  
36 17 50 Baumgartner RN, Wayne SJ, Waters DL, et al. Sarcopenic obesity predicts instrumental activities  
37 18 of daily living disability in the elderly. *Obes Res* 2004;12:1995–2004. doi:10.1038/oby.2004.250  
38  
39  
40 19 51 Grundy SM, Neeland IJ, Turer AT, et al. Clinical Study Waist Circumference as Measure of  
41 20 Abdominal Fat Compartments. *J Obes* 2013;2013. doi:10.1155/2013/454285  
42  
43  
44 21 52 Buta BJ, Walston JD, Godino JG, et al. Frailty assessment instruments: Systematic characterisation  
45 22 of the uses and contexts of highly-cited instruments. *Ageing Res Rev* 2016;26:53–61.  
46 23 doi:10.1016/j.arr.2015.12.003  
47  
48  
49  
50 24 53 Panza F, Lozupone M, Solfrizzi V, et al. Different Cognitive Frailty Models and Health- and  
51 25 Cognitive-related Outcomes in Older Age: From Epidemiology to Prevention. *J Alzheimer's Dis*  
52 26 2018;62:993–1012. doi:10.3233/JAD-170963  
53  
54  
55  
56 27 54 Theou O, Cann L, Blodgett J, et al. Modifications to the frailty phenotype criteria: Systematic  
57  
58  
59  
60

- 1  
2  
3 1 review of the current literature and investigation of 262 frailty phenotypes in the Survey of Health,  
4 2 Ageing, and Retirement in Europe. *Ageing Res Rev* 2015;21:78–94. doi:10.1016/j.arr.2015.04.001  
5  
6  
7 3 55 Kim S, Kim M, Jung H-W, *et al.* Development of a Frailty Phenotype Questionnaire for Use in  
8 4 Screening Community-Dwelling Older Adults. *J Am Med Dir Assoc* 2020;21:660–4.  
9 5 doi:10.1016/j.jamda.2019.08.028  
10  
11  
12  
13 6 56 Van der Elst MCJ, Schoenmakers B, Op het Veld LPM, *et al.* Validation of replacement questions  
14 7 for slowness and weakness to assess the Fried Phenotype: a cross-sectional study. *Eur Geriatr Med*  
15 8 2020;11:793–801. doi:10.1007/s41999-020-00337-8  
16  
17  
18  
19 9 57 Cooper R, Shkolnikov VM, Kudryavtsev A V., *et al.* Between-study differences in grip strength: a  
20 10 comparison of Norwegian and Russian adults aged 40–69 years. *J Cachexia Sarcopenia Muscle*  
21 11 2021;12:2091–100. doi:10.1002/jcsm.12816  
22  
23  
24 12 58 OECD, European Observatory on Health Systems and Policies (2021). Norway: Country Health  
25 13 Profile 2021, State of Health in the EU. OECD Publishing 2021. doi:10.1787/6871e6c4-en  
26  
27  
28  
29 14 59 Gordon SJ, Baker N, Kidd M, *et al.* Pre-frailty factors in community-dwelling 40-75 year olds:  
30 15 opportunities for successful ageing. *BMC Geriatr* 2020;20:96. doi:10.1186/s12877-020-1490-7  
31  
32  
33 16  
34  
35 17  
36  
37  
38 18  
39  
40  
41 19  
42  
43 20  
44  
45  
46 21  
47  
48 22  
49  
50  
51 23  
52  
53  
54 24  
55  
56 25  
57  
58  
59  
60

1  
2  
3 **1 List of Figures**  
4

5  
6 2 Figure 1 Flowchart displaying participants' inclusion and exclusion  
7

8 3 Supplementary Figure 1 Trajectories of individuals with repeated body mass index measurements between  
9 4 Tromsø4 and Tromsø7: The Tromsø Study 1994–2016  
10

11 5 Supplementary Figure 2 Trajectories of individuals with repeated waist circumference measurements  
12 6 between Tromsø4 and Tromsø7: The Tromsø Study 1994–2016  
13  
14  
15  
16  
17  
18  
19  
20  
21  
22  
23  
24  
25  
26  
27  
28  
29  
30  
31  
32  
33  
34  
35  
36  
37  
38  
39  
40  
41  
42  
43  
44  
45  
46  
47  
48  
49  
50  
51  
52  
53  
54  
55  
56  
57  
58  
59  
60

For peer review only

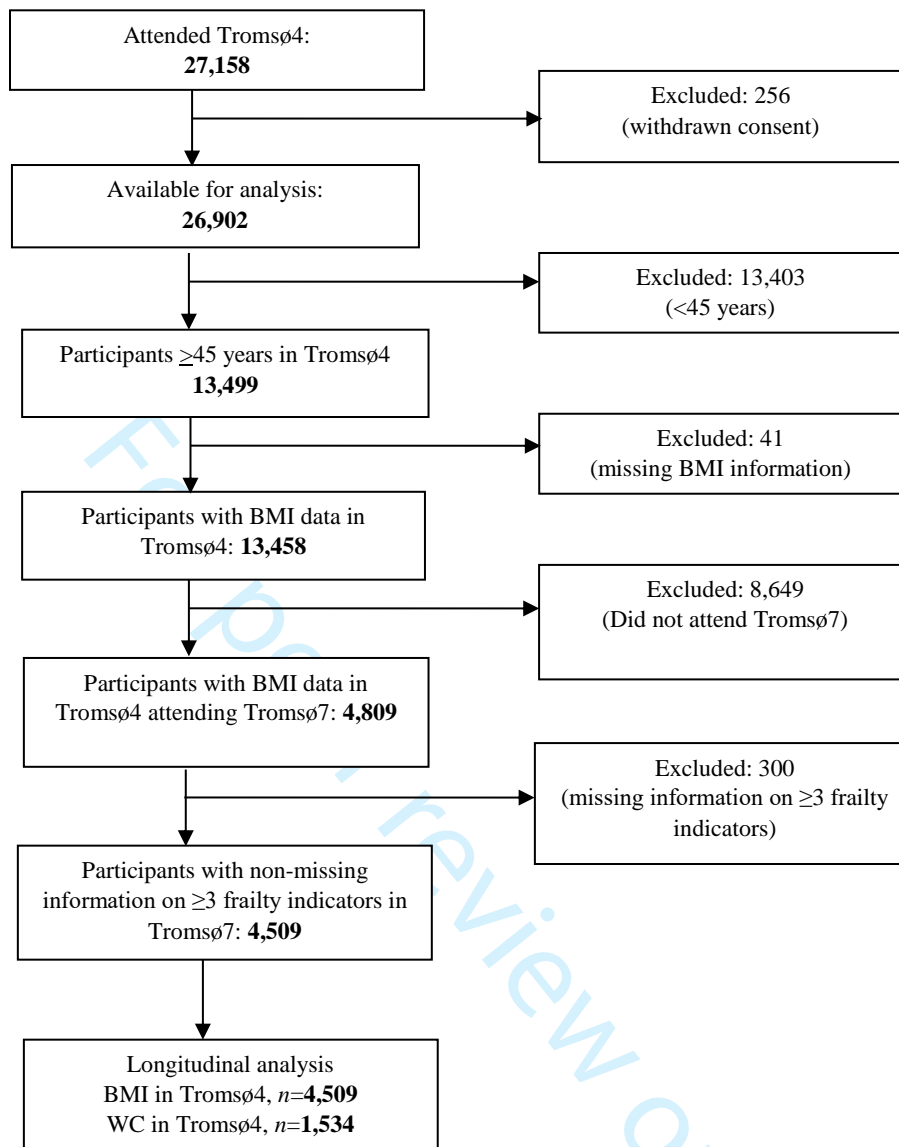

Figure 1 Flowchart displaying participants' inclusion and exclusion

1  
2  
3  
4  
5  
6  
7  
8  
9  
10  
11  
12  
13  
14  
15  
16  
17  
18  
19  
20  
21  
22  
23  
24  
25  
26  
27  
28  
29  
30  
31  
32  
33  
34  
35  
36  
37  
38  
39  
40  
41  
42  
43  
44  
45  
46  
47  
48  
49  
50  
51  
52  
53  
54  
55  
56  
57  
58  
59  
60

## SUPPLEMENTARY TABLES

For peer review only

Supplementary Table 1 Comparison between Fried et al.'s suggested criteria for frailty and modified frailty indicators used in this study

| Frailty                  | Fried et al. (2001)                                                                                                                                                                                                                                                                                                                                                                                                                                                                                                                                                                                                                                                                                                                                                                                                                                                                                                     | Current study                                                                                                                                                                                                                                                                                                                                                                                                                                                                                                                                                                                 |                                                      |         |        |             |        |             |        |         |        |       |                                                      |         |        |             |          |             |        |         |        |                                                                                                                                                                                                                                                                                                                                                                                                                                                                                                                                                                                                                                                                                                                                                                                                                                                                           |     |                                                      |         |        |             |        |             |        |         |        |       |                                                      |         |        |             |          |             |        |         |        |
|--------------------------|-------------------------------------------------------------------------------------------------------------------------------------------------------------------------------------------------------------------------------------------------------------------------------------------------------------------------------------------------------------------------------------------------------------------------------------------------------------------------------------------------------------------------------------------------------------------------------------------------------------------------------------------------------------------------------------------------------------------------------------------------------------------------------------------------------------------------------------------------------------------------------------------------------------------------|-----------------------------------------------------------------------------------------------------------------------------------------------------------------------------------------------------------------------------------------------------------------------------------------------------------------------------------------------------------------------------------------------------------------------------------------------------------------------------------------------------------------------------------------------------------------------------------------------|------------------------------------------------------|---------|--------|-------------|--------|-------------|--------|---------|--------|-------|------------------------------------------------------|---------|--------|-------------|----------|-------------|--------|---------|--------|---------------------------------------------------------------------------------------------------------------------------------------------------------------------------------------------------------------------------------------------------------------------------------------------------------------------------------------------------------------------------------------------------------------------------------------------------------------------------------------------------------------------------------------------------------------------------------------------------------------------------------------------------------------------------------------------------------------------------------------------------------------------------------------------------------------------------------------------------------------------------|-----|------------------------------------------------------|---------|--------|-------------|--------|-------------|--------|---------|--------|-------|------------------------------------------------------|---------|--------|-------------|----------|-------------|--------|---------|--------|
| <b>Exhaustion</b>        | <p>Questions from the Center for Epidemiologic Studies Depression Scale:</p> <p>(a) I felt that everything I did was an effort</p> <p>(b) I could not get going</p> <p>How often in the last week did you feel this way?</p> <p>0 = Rarely or none of the time (&lt;1 day)</p> <p>1 = Some or a little of the time (1–2 days)</p> <p>2 = A moderate amount of time (3–4 days)</p> <p>3 = Most of the time</p> <p><b>Exhausted: “A moderate amount of time (3–4 days)” or “Most of the time”</b></p>                                                                                                                                                                                                                                                                                                                                                                                                                     | <p>Hopkins Symptom Checklist (HSCL-10):</p> <p>During the last week, have you experienced that everything is a struggle?</p> <p>1 = No complaint</p> <p>2 = Little complaint</p> <p>3 = Pretty much</p> <p>4 = Very much</p> <p><b>Exhausted: “Pretty much” or “Very much”</b></p>                                                                                                                                                                                                                                                                                                            |                                                      |         |        |             |        |             |        |         |        |       |                                                      |         |        |             |          |             |        |         |        |                                                                                                                                                                                                                                                                                                                                                                                                                                                                                                                                                                                                                                                                                                                                                                                                                                                                           |     |                                                      |         |        |             |        |             |        |         |        |       |                                                      |         |        |             |          |             |        |         |        |
| <b>Physical activity</b> | <p>Minnesota Leisure Time Activity Questionnaire asking about walking, chores (moderately strenuous), mowing the lawn, raking, gardening, hiking, jogging, biking, exercise, cycling, dancing, aerobics, bowling, golf, singles, tennis, racquetball, calisthenics, swimming.</p> <p>The kcal/week expended was calculated using a standardized algorithm. Lowest 20% were identified, resulting in following cut-off for frailty:</p> <p>Men: &lt;383 kcal of physical activity/week</p> <p>Women: &lt;270 kcal of physical activity/week</p>                                                                                                                                                                                                                                                                                                                                                                          | <p>Describe your exercise and physical exertion in leisure time over the last year (Saltin &amp; Grimby's Scale).</p> <p>1 = Reading, watching TV/screen or other sedentary activity</p> <p>2 = Walking, cycling, or other forms of exercise at least 4 hours a week</p> <p>3 = Participation in recreational sports, heavy gardening, snow shoveling, etc. at least 4 hours a week</p> <p>4 = Participation in hard training or sports competitions, regularly several times a week</p> <p><b>Low physical activity level: “Reading, watching TV/screen or other sedentary activity”</b></p> |                                                      |         |        |             |        |             |        |         |        |       |                                                      |         |        |             |          |             |        |         |        |                                                                                                                                                                                                                                                                                                                                                                                                                                                                                                                                                                                                                                                                                                                                                                                                                                                                           |     |                                                      |         |        |             |        |             |        |         |        |       |                                                      |         |        |             |          |             |        |         |        |
| <b>Weight loss</b>       | <p>In the last year, have you lost more than 10 pounds (4.5 kg) unintentionally (not due to dieting or exercise)?</p> <p><b>Frail: “Yes”</b></p>                                                                                                                                                                                                                                                                                                                                                                                                                                                                                                                                                                                                                                                                                                                                                                        | <p>Have you involuntarily lost weight during the last 6 months? (Malnutrition Universal Screening Tool)</p> <p>0 = No</p> <p>1 = Yes</p> <p><b>Lost weight: “Yes”</b></p>                                                                                                                                                                                                                                                                                                                                                                                                                     |                                                      |         |        |             |        |             |        |         |        |       |                                                      |         |        |             |          |             |        |         |        |                                                                                                                                                                                                                                                                                                                                                                                                                                                                                                                                                                                                                                                                                                                                                                                                                                                                           |     |                                                      |         |        |             |        |             |        |         |        |       |                                                      |         |        |             |          |             |        |         |        |
| <b>Grip strength</b>     | <p>Measured by Jamar dynamometer (kg)</p> <p>Maximal strength in dominant hand (3 trials)</p> <p>Stratified by sex and BMI quartiles. Lowest 20% were identified, resulting in the following cut-off for frailty:</p> <table border="1"> <thead> <tr> <th>Men</th> <th>Cut-off for grip strength (kg) criterion for frailty</th> </tr> </thead> <tbody> <tr> <td>BMI ≤24</td> <td>≤29 kg</td> </tr> <tr> <td>BMI 24.1–26</td> <td>≤30 kg</td> </tr> <tr> <td>BMI 26.1–28</td> <td>≤30 kg</td> </tr> <tr> <td>BMI &gt;28</td> <td>≤32 kg</td> </tr> </tbody> </table> <table border="1"> <thead> <tr> <th>Women</th> <th>Cut-off for grip strength (kg) criterion for frailty</th> </tr> </thead> <tbody> <tr> <td>BMI ≤23</td> <td>≤17 kg</td> </tr> <tr> <td>BMI 23.1–26</td> <td>≤17.3 kg</td> </tr> <tr> <td>BMI 26.1–29</td> <td>≤18 kg</td> </tr> <tr> <td>BMI &gt;29</td> <td>≤21 kg</td> </tr> </tbody> </table> | Men                                                                                                                                                                                                                                                                                                                                                                                                                                                                                                                                                                                           | Cut-off for grip strength (kg) criterion for frailty | BMI ≤24 | ≤29 kg | BMI 24.1–26 | ≤30 kg | BMI 26.1–28 | ≤30 kg | BMI >28 | ≤32 kg | Women | Cut-off for grip strength (kg) criterion for frailty | BMI ≤23 | ≤17 kg | BMI 23.1–26 | ≤17.3 kg | BMI 26.1–29 | ≤18 kg | BMI >29 | ≤21 kg | <p>Measured by Jamar dynamometer (kg)</p> <p>Strongest measurement from 3 trials in each hand</p> <p>Stratified by sex and BMI quartiles as per Fried's definition:</p> <table border="1"> <thead> <tr> <th>Men</th> <th>Cut-off for grip strength (kg) criterion for frailty</th> </tr> </thead> <tbody> <tr> <td>BMI ≤24</td> <td>≤29 kg</td> </tr> <tr> <td>BMI 24.1–26</td> <td>≤30 kg</td> </tr> <tr> <td>BMI 26.1–28</td> <td>≤30 kg</td> </tr> <tr> <td>BMI &gt;28</td> <td>≤32 kg</td> </tr> </tbody> </table> <table border="1"> <thead> <tr> <th>Women</th> <th>Cut-off for grip strength (kg) criterion for frailty</th> </tr> </thead> <tbody> <tr> <td>BMI ≤23</td> <td>≤17 kg</td> </tr> <tr> <td>BMI 23.1–26</td> <td>≤17.3 kg</td> </tr> <tr> <td>BMI 26.1–29</td> <td>≤18 kg</td> </tr> <tr> <td>BMI &gt;29</td> <td>≤21 kg</td> </tr> </tbody> </table> | Men | Cut-off for grip strength (kg) criterion for frailty | BMI ≤24 | ≤29 kg | BMI 24.1–26 | ≤30 kg | BMI 26.1–28 | ≤30 kg | BMI >28 | ≤32 kg | Women | Cut-off for grip strength (kg) criterion for frailty | BMI ≤23 | ≤17 kg | BMI 23.1–26 | ≤17.3 kg | BMI 26.1–29 | ≤18 kg | BMI >29 | ≤21 kg |
| Men                      | Cut-off for grip strength (kg) criterion for frailty                                                                                                                                                                                                                                                                                                                                                                                                                                                                                                                                                                                                                                                                                                                                                                                                                                                                    |                                                                                                                                                                                                                                                                                                                                                                                                                                                                                                                                                                                               |                                                      |         |        |             |        |             |        |         |        |       |                                                      |         |        |             |          |             |        |         |        |                                                                                                                                                                                                                                                                                                                                                                                                                                                                                                                                                                                                                                                                                                                                                                                                                                                                           |     |                                                      |         |        |             |        |             |        |         |        |       |                                                      |         |        |             |          |             |        |         |        |
| BMI ≤24                  | ≤29 kg                                                                                                                                                                                                                                                                                                                                                                                                                                                                                                                                                                                                                                                                                                                                                                                                                                                                                                                  |                                                                                                                                                                                                                                                                                                                                                                                                                                                                                                                                                                                               |                                                      |         |        |             |        |             |        |         |        |       |                                                      |         |        |             |          |             |        |         |        |                                                                                                                                                                                                                                                                                                                                                                                                                                                                                                                                                                                                                                                                                                                                                                                                                                                                           |     |                                                      |         |        |             |        |             |        |         |        |       |                                                      |         |        |             |          |             |        |         |        |
| BMI 24.1–26              | ≤30 kg                                                                                                                                                                                                                                                                                                                                                                                                                                                                                                                                                                                                                                                                                                                                                                                                                                                                                                                  |                                                                                                                                                                                                                                                                                                                                                                                                                                                                                                                                                                                               |                                                      |         |        |             |        |             |        |         |        |       |                                                      |         |        |             |          |             |        |         |        |                                                                                                                                                                                                                                                                                                                                                                                                                                                                                                                                                                                                                                                                                                                                                                                                                                                                           |     |                                                      |         |        |             |        |             |        |         |        |       |                                                      |         |        |             |          |             |        |         |        |
| BMI 26.1–28              | ≤30 kg                                                                                                                                                                                                                                                                                                                                                                                                                                                                                                                                                                                                                                                                                                                                                                                                                                                                                                                  |                                                                                                                                                                                                                                                                                                                                                                                                                                                                                                                                                                                               |                                                      |         |        |             |        |             |        |         |        |       |                                                      |         |        |             |          |             |        |         |        |                                                                                                                                                                                                                                                                                                                                                                                                                                                                                                                                                                                                                                                                                                                                                                                                                                                                           |     |                                                      |         |        |             |        |             |        |         |        |       |                                                      |         |        |             |          |             |        |         |        |
| BMI >28                  | ≤32 kg                                                                                                                                                                                                                                                                                                                                                                                                                                                                                                                                                                                                                                                                                                                                                                                                                                                                                                                  |                                                                                                                                                                                                                                                                                                                                                                                                                                                                                                                                                                                               |                                                      |         |        |             |        |             |        |         |        |       |                                                      |         |        |             |          |             |        |         |        |                                                                                                                                                                                                                                                                                                                                                                                                                                                                                                                                                                                                                                                                                                                                                                                                                                                                           |     |                                                      |         |        |             |        |             |        |         |        |       |                                                      |         |        |             |          |             |        |         |        |
| Women                    | Cut-off for grip strength (kg) criterion for frailty                                                                                                                                                                                                                                                                                                                                                                                                                                                                                                                                                                                                                                                                                                                                                                                                                                                                    |                                                                                                                                                                                                                                                                                                                                                                                                                                                                                                                                                                                               |                                                      |         |        |             |        |             |        |         |        |       |                                                      |         |        |             |          |             |        |         |        |                                                                                                                                                                                                                                                                                                                                                                                                                                                                                                                                                                                                                                                                                                                                                                                                                                                                           |     |                                                      |         |        |             |        |             |        |         |        |       |                                                      |         |        |             |          |             |        |         |        |
| BMI ≤23                  | ≤17 kg                                                                                                                                                                                                                                                                                                                                                                                                                                                                                                                                                                                                                                                                                                                                                                                                                                                                                                                  |                                                                                                                                                                                                                                                                                                                                                                                                                                                                                                                                                                                               |                                                      |         |        |             |        |             |        |         |        |       |                                                      |         |        |             |          |             |        |         |        |                                                                                                                                                                                                                                                                                                                                                                                                                                                                                                                                                                                                                                                                                                                                                                                                                                                                           |     |                                                      |         |        |             |        |             |        |         |        |       |                                                      |         |        |             |          |             |        |         |        |
| BMI 23.1–26              | ≤17.3 kg                                                                                                                                                                                                                                                                                                                                                                                                                                                                                                                                                                                                                                                                                                                                                                                                                                                                                                                |                                                                                                                                                                                                                                                                                                                                                                                                                                                                                                                                                                                               |                                                      |         |        |             |        |             |        |         |        |       |                                                      |         |        |             |          |             |        |         |        |                                                                                                                                                                                                                                                                                                                                                                                                                                                                                                                                                                                                                                                                                                                                                                                                                                                                           |     |                                                      |         |        |             |        |             |        |         |        |       |                                                      |         |        |             |          |             |        |         |        |
| BMI 26.1–29              | ≤18 kg                                                                                                                                                                                                                                                                                                                                                                                                                                                                                                                                                                                                                                                                                                                                                                                                                                                                                                                  |                                                                                                                                                                                                                                                                                                                                                                                                                                                                                                                                                                                               |                                                      |         |        |             |        |             |        |         |        |       |                                                      |         |        |             |          |             |        |         |        |                                                                                                                                                                                                                                                                                                                                                                                                                                                                                                                                                                                                                                                                                                                                                                                                                                                                           |     |                                                      |         |        |             |        |             |        |         |        |       |                                                      |         |        |             |          |             |        |         |        |
| BMI >29                  | ≤21 kg                                                                                                                                                                                                                                                                                                                                                                                                                                                                                                                                                                                                                                                                                                                                                                                                                                                                                                                  |                                                                                                                                                                                                                                                                                                                                                                                                                                                                                                                                                                                               |                                                      |         |        |             |        |             |        |         |        |       |                                                      |         |        |             |          |             |        |         |        |                                                                                                                                                                                                                                                                                                                                                                                                                                                                                                                                                                                                                                                                                                                                                                                                                                                                           |     |                                                      |         |        |             |        |             |        |         |        |       |                                                      |         |        |             |          |             |        |         |        |
| Men                      | Cut-off for grip strength (kg) criterion for frailty                                                                                                                                                                                                                                                                                                                                                                                                                                                                                                                                                                                                                                                                                                                                                                                                                                                                    |                                                                                                                                                                                                                                                                                                                                                                                                                                                                                                                                                                                               |                                                      |         |        |             |        |             |        |         |        |       |                                                      |         |        |             |          |             |        |         |        |                                                                                                                                                                                                                                                                                                                                                                                                                                                                                                                                                                                                                                                                                                                                                                                                                                                                           |     |                                                      |         |        |             |        |             |        |         |        |       |                                                      |         |        |             |          |             |        |         |        |
| BMI ≤24                  | ≤29 kg                                                                                                                                                                                                                                                                                                                                                                                                                                                                                                                                                                                                                                                                                                                                                                                                                                                                                                                  |                                                                                                                                                                                                                                                                                                                                                                                                                                                                                                                                                                                               |                                                      |         |        |             |        |             |        |         |        |       |                                                      |         |        |             |          |             |        |         |        |                                                                                                                                                                                                                                                                                                                                                                                                                                                                                                                                                                                                                                                                                                                                                                                                                                                                           |     |                                                      |         |        |             |        |             |        |         |        |       |                                                      |         |        |             |          |             |        |         |        |
| BMI 24.1–26              | ≤30 kg                                                                                                                                                                                                                                                                                                                                                                                                                                                                                                                                                                                                                                                                                                                                                                                                                                                                                                                  |                                                                                                                                                                                                                                                                                                                                                                                                                                                                                                                                                                                               |                                                      |         |        |             |        |             |        |         |        |       |                                                      |         |        |             |          |             |        |         |        |                                                                                                                                                                                                                                                                                                                                                                                                                                                                                                                                                                                                                                                                                                                                                                                                                                                                           |     |                                                      |         |        |             |        |             |        |         |        |       |                                                      |         |        |             |          |             |        |         |        |
| BMI 26.1–28              | ≤30 kg                                                                                                                                                                                                                                                                                                                                                                                                                                                                                                                                                                                                                                                                                                                                                                                                                                                                                                                  |                                                                                                                                                                                                                                                                                                                                                                                                                                                                                                                                                                                               |                                                      |         |        |             |        |             |        |         |        |       |                                                      |         |        |             |          |             |        |         |        |                                                                                                                                                                                                                                                                                                                                                                                                                                                                                                                                                                                                                                                                                                                                                                                                                                                                           |     |                                                      |         |        |             |        |             |        |         |        |       |                                                      |         |        |             |          |             |        |         |        |
| BMI >28                  | ≤32 kg                                                                                                                                                                                                                                                                                                                                                                                                                                                                                                                                                                                                                                                                                                                                                                                                                                                                                                                  |                                                                                                                                                                                                                                                                                                                                                                                                                                                                                                                                                                                               |                                                      |         |        |             |        |             |        |         |        |       |                                                      |         |        |             |          |             |        |         |        |                                                                                                                                                                                                                                                                                                                                                                                                                                                                                                                                                                                                                                                                                                                                                                                                                                                                           |     |                                                      |         |        |             |        |             |        |         |        |       |                                                      |         |        |             |          |             |        |         |        |
| Women                    | Cut-off for grip strength (kg) criterion for frailty                                                                                                                                                                                                                                                                                                                                                                                                                                                                                                                                                                                                                                                                                                                                                                                                                                                                    |                                                                                                                                                                                                                                                                                                                                                                                                                                                                                                                                                                                               |                                                      |         |        |             |        |             |        |         |        |       |                                                      |         |        |             |          |             |        |         |        |                                                                                                                                                                                                                                                                                                                                                                                                                                                                                                                                                                                                                                                                                                                                                                                                                                                                           |     |                                                      |         |        |             |        |             |        |         |        |       |                                                      |         |        |             |          |             |        |         |        |
| BMI ≤23                  | ≤17 kg                                                                                                                                                                                                                                                                                                                                                                                                                                                                                                                                                                                                                                                                                                                                                                                                                                                                                                                  |                                                                                                                                                                                                                                                                                                                                                                                                                                                                                                                                                                                               |                                                      |         |        |             |        |             |        |         |        |       |                                                      |         |        |             |          |             |        |         |        |                                                                                                                                                                                                                                                                                                                                                                                                                                                                                                                                                                                                                                                                                                                                                                                                                                                                           |     |                                                      |         |        |             |        |             |        |         |        |       |                                                      |         |        |             |          |             |        |         |        |
| BMI 23.1–26              | ≤17.3 kg                                                                                                                                                                                                                                                                                                                                                                                                                                                                                                                                                                                                                                                                                                                                                                                                                                                                                                                |                                                                                                                                                                                                                                                                                                                                                                                                                                                                                                                                                                                               |                                                      |         |        |             |        |             |        |         |        |       |                                                      |         |        |             |          |             |        |         |        |                                                                                                                                                                                                                                                                                                                                                                                                                                                                                                                                                                                                                                                                                                                                                                                                                                                                           |     |                                                      |         |        |             |        |             |        |         |        |       |                                                      |         |        |             |          |             |        |         |        |
| BMI 26.1–29              | ≤18 kg                                                                                                                                                                                                                                                                                                                                                                                                                                                                                                                                                                                                                                                                                                                                                                                                                                                                                                                  |                                                                                                                                                                                                                                                                                                                                                                                                                                                                                                                                                                                               |                                                      |         |        |             |        |             |        |         |        |       |                                                      |         |        |             |          |             |        |         |        |                                                                                                                                                                                                                                                                                                                                                                                                                                                                                                                                                                                                                                                                                                                                                                                                                                                                           |     |                                                      |         |        |             |        |             |        |         |        |       |                                                      |         |        |             |          |             |        |         |        |
| BMI >29                  | ≤21 kg                                                                                                                                                                                                                                                                                                                                                                                                                                                                                                                                                                                                                                                                                                                                                                                                                                                                                                                  |                                                                                                                                                                                                                                                                                                                                                                                                                                                                                                                                                                                               |                                                      |         |        |             |        |             |        |         |        |       |                                                      |         |        |             |          |             |        |         |        |                                                                                                                                                                                                                                                                                                                                                                                                                                                                                                                                                                                                                                                                                                                                                                                                                                                                           |     |                                                      |         |        |             |        |             |        |         |        |       |                                                      |         |        |             |          |             |        |         |        |



| Frailty               | Fried et al. (2001)                                                                                                                                                                                                                                                                                                                                                                                                                 | Current study                                                                                                                                                                                                                                                                                                                                                                                                                              |
|-----------------------|-------------------------------------------------------------------------------------------------------------------------------------------------------------------------------------------------------------------------------------------------------------------------------------------------------------------------------------------------------------------------------------------------------------------------------------|--------------------------------------------------------------------------------------------------------------------------------------------------------------------------------------------------------------------------------------------------------------------------------------------------------------------------------------------------------------------------------------------------------------------------------------------|
| <b>Walking speed</b>  | Time to walk (seconds) <u>15 feet at usual pace</u> stratified by sex and height (gender-specific cut-off at medium height): Lowest 20% were identified, resulting in the following cut-off for frailty:<br><b>Men</b> <b>Cut-off for walking speed criterion for frailty</b><br>Height $\leq 173$ cm $\geq 7$ s<br>Height $> 173$ cm $\geq 6$ s<br><b>Women</b><br>Height $\leq 159$ cm $\geq 7$ s<br>Height $> 159$ cm $\geq 6$ s | SPPB: Short Physical Performance Battery – walking test<br>Fastest of two times (seconds) to walk 4 m stratified by sex and height according to Fried's gender-specific cut-off. Converted to feet from meters.<br><b>Men</b> <b>Cut-off for walking speed criterion for frailty</b><br>Height $\leq 173$ cm $\geq 7$ s<br>Height $> 173$ cm $\geq 6$ s<br><b>Women</b><br>Height $\leq 159$ cm $\geq 7$ s<br>Height $> 159$ cm $\geq 6$ s |
| <b>Frailty status</b> | Frailty score:<br>0 = Robust<br>1–2 = Pre-frail<br>$\geq 3$ = Frail                                                                                                                                                                                                                                                                                                                                                                 | Frailty score:<br>0 = Robust<br>1–2 = Pre-frail<br>$\geq 3$ = Frail<br><br>Pre-frailty/frailty score:<br>0 = Robust<br>$\geq 1$ = Pre-frail/frail                                                                                                                                                                                                                                                                                          |

Supplementary Table 2 Descriptive characteristics of participants at follow-up: The Tromsø Study 2015-2016

|                                             | Frailty status                    |                                             | P value             |
|---------------------------------------------|-----------------------------------|---------------------------------------------|---------------------|
|                                             | Robust<br>(% (n))<br>70.5 (3,179) | Pre-frail/ frail<br>(% (n))<br>29.5 (1,330) |                     |
| Age in years, mean (SD)                     | 72.1 (5.1)                        | 73.8 (5.9)                                  | <0.001 <sup>a</sup> |
| <b>Women</b>                                | 50.6 (1608)                       | 55.0 (732)                                  | 0.006               |
| <b>Smoking status</b>                       |                                   |                                             |                     |
| Current smokers                             | 8.3 (262)                         | 14.4 (188)                                  |                     |
| Former smokers                              | 53.2 (1,674)                      | 50.8 (666)                                  | <0.001              |
| Never                                       | 38.4 (1,208)                      | 34.8 (456)                                  |                     |
| <b>Married or cohabiting</b>                | 71.0 (2,258)                      | 64.6 (859)                                  | <0.001              |
| <b>Self-perceived health – good</b>         | 69.4 (2,178)                      | 43.2 (566)                                  | <0.001              |
| <b>Social support – enough good friends</b> | 87.4 (2,676)                      | 82.0 (1,047)                                | <0.001              |
| <b>Educational level</b>                    |                                   |                                             |                     |
| Primary/Partly secondary                    | 39.1 (1,201)                      | 50 (632)                                    |                     |
| Upper secondary                             | 26.6 (817)                        | 26.2 (331)                                  | <0.001              |
| College/University short                    | 16.3 (500)                        | 12.2 (154)                                  |                     |
| College/University long                     | 18.1 (556)                        | 11.6 (147)                                  |                     |
| <b>Alcohol intake</b>                       |                                   |                                             |                     |
| Never/Abstaining                            | 11.2 (352)                        | 17.4 (229)                                  |                     |
| Infrequent drinkers                         | 58.6 (1,846)                      | 61.0 (803)                                  | <0.001              |
| Frequent drinkers                           | 30.3 (954)                        | 21.6 (284)                                  |                     |
| <b>Prevalent diseases</b>                   |                                   |                                             |                     |
| Pulmonary disease <sup>b</sup>              | 14.6 (444)                        | 19.9 (250)                                  | <0.001              |
| Coronary heart disease <sup>c</sup>         | 13.7 (415)                        | 19.3 (241)                                  | <0.001              |
| Diabetes                                    | 7.3 (224)                         | 14.8 (186)                                  | <0.001              |
| Cancer                                      | 15.6 (475)                        | 19.3 (243)                                  | 0.003               |
| Stroke                                      | 5.1 (154)                         | 8.1 (101)                                   | <0.001              |
| Peptic ulcer                                | –                                 | –                                           | <0.001              |
| <b>Comorbidity</b>                          | 89.8 (2,800)                      | 82.4 (1,075)                                | <0.001              |
| <b>BMI categories</b>                       |                                   |                                             |                     |
| Underweight                                 | 0.5 (17)                          | 1.4 (18)                                    |                     |
| Normal                                      | 30.0 (951)                        | 24.5 (323)                                  | <0.001              |
| Overweight                                  | 49.4 (1,566)                      | 41.4 (547)                                  |                     |
| Obese                                       | 20.1 (639)                        | 32.7 (432)                                  |                     |
| <b>WC categories</b>                        |                                   |                                             |                     |
| Normal                                      | 22.6 (716)                        | 17.1 (225)                                  |                     |
| Moderately high                             | 28.0 (888)                        | 21.3 (281)                                  | <0.001              |
| High                                        | 49.4 (1,569)                      | 61.6 (812)                                  |                     |

Values are percentage (number); P value:  $\chi^2$  test for categorical variables P value: <sup>a</sup>Student's t-test; <sup>b</sup>including asthma/chronic bronchitis/emphysema; <sup>c</sup>including angina pectoris/myocardial infarction. BMI, body mass index; WC, waist circumference.

**BMI categories**Underweight: <18.5 kg/m<sup>2</sup>Normal: 18.5–24.9 kg/m<sup>2</sup>Overweight: 25.0–29.9 kg/m<sup>2</sup>Obesity: ≥30 kg/m<sup>2</sup>**WC categories**

Normal: men ≤94 cm; women ≤80 cm

Moderately high: men 95–102 cm; women 81–88 cm

High: men &gt;102 cm; women &gt;88 cm

Supplementary Table 3 Descriptive baseline characteristics of Tromsø4 participants who attended Tromsø7 versus those who did not: The Tromsø Study 1994–2016

|                                             | Frailty status                               |                                          | P value             |
|---------------------------------------------|----------------------------------------------|------------------------------------------|---------------------|
|                                             | Not attended Tromsø7<br>n = 8,649<br>(% (n)) | Attended Tromsø7<br>n = 4,809<br>(% (n)) |                     |
| <b>Age in years, mean (SD)</b>              | 63.2 (11.0)                                  | 52.0 (5.8)                               | <0.001 <sup>a</sup> |
| <b>Women</b>                                | 52.4 (4,533)                                 | 52.4 (2520)                              | 0.990               |
| <b>Smoking status</b>                       |                                              |                                          |                     |
| Current smokers                             | 33.7 (2,916)                                 | 29.4 (1,414)                             |                     |
| Former smokers                              | 33.4 (2,886)                                 | 35.6 (1,714)                             | <0.001              |
| Never                                       | 32.9 (2,847)                                 | (34.9) 1,681                             |                     |
| <b>Married or cohabiting</b>                | 64.7 (5,568)                                 | (82.7) 3,977                             | <0.001              |
| <b>Self-perceived health status – good</b>  | 50.7 (4,378)                                 | (70.3) 3,379                             | <0.001              |
| <b>Social support – enough good friends</b> | 83.0 (5,775)                                 | (82.2) 3,590                             | 0.330               |
| <b>Educational level</b>                    |                                              |                                          |                     |
| Primary/Partly secondary                    | 57.2 (4,911)                                 | (36.9) 1,768                             |                     |
| Upper secondary                             | 27.5 (2,362)                                 | (34.1) 1,633                             | <0.001              |
| College/University short                    | 8.1 (696)                                    | (14.9) 716                               |                     |
| College/University long                     | 7.2 (622)                                    | (14.1) 678                               |                     |
| <b>Alcohol intake</b>                       |                                              |                                          |                     |
| Never/Abstaining                            | 24.5 (2,108)                                 | (10.2) 491                               |                     |
| Infrequent drinkers                         | 66.8 (5,749)                                 | (76.2) 3655                              | <0.001              |
| Frequent drinkers                           | 8.7 (744)                                    | (13.5) 649                               |                     |
| <b>Prevalent diseases</b>                   |                                              |                                          |                     |
| Pulmonary disease <sup>b</sup>              | 16.2 (1,097)                                 | (9.9) 430                                | <0.001              |
| Coronary heart disease <sup>c</sup>         | 14.8 (1,281)                                 | (3.1) 149                                | <0.001              |
| Diabetes                                    | 4.3 (374)                                    | (0.5) 25                                 | <0.001              |
| Cancer                                      | 7.7 (517)                                    | (3.1) 132                                | <0.001              |
| Stroke                                      | 3.7 (318)                                    | (0.7) 33                                 | <0.001              |
| Ulcer                                       | 14.1 (908)                                   | (7.8) 333                                | <0.001              |
| <b>Comorbidity</b>                          | 9.9 (858)                                    | (2.3) 36                                 | <0.001              |
| <b>BMI categories</b>                       |                                              |                                          |                     |
| Underweight                                 | 1.7 (149)                                    | 0.5 (22)                                 |                     |
| Normal                                      | 40.0 (3,463)                                 | 44.9 (2,169)                             | <0.001              |
| Overweight                                  | 42.3 (3,659)                                 | 43.5 (2,094)                             |                     |
| Obesity                                     | 15.9 (1,378)                                 | 11.1 (533)                               |                     |
| <b>WC categories</b>                        |                                              |                                          |                     |
| Normal                                      | 39.0 (1,784)                                 | 45 (765)                                 |                     |
| Moderately high                             | 29.7 (1,356)                                 | 32.6 (554)                               | <0.001              |
| High                                        | 31.3 (1,434)                                 | 22.4 (381)                               |                     |

Values are percentage (number); P value:  $\chi^2$  test for categorical variables P value: <sup>a</sup>Student's t-test; <sup>b</sup>including asthma/chronic bronchitis/emphysema; <sup>c</sup>including angina pectoris/myocardial infarction. BMI, body mass index; WC, waist circumference.

**BMI categories**Underweight: <18.5 kg/m<sup>2</sup>Normal: 18.5–24.9 kg/m<sup>2</sup>Overweight: 25.0–29.9 kg/m<sup>2</sup>Obesity: ≥30 kg/m<sup>2</sup>**WC categories**

Normal: men ≤94 cm; women ≤80 cm

Moderately high: men 95–102 cm; women 81–88 cm

High: men &gt;102 cm; women &gt;88 cm

Supplementary Table 4 Cross-sectional association between BMI and WC, and pre-frailty/frailty: The Tromsø Study 2015–2016

|                              | Frailty status    |                            | Model 1           | Model 2           |
|------------------------------|-------------------|----------------------------|-------------------|-------------------|
|                              | Robust<br>(% (n)) | Pre-frail/frail<br>(% (n)) | OR (95% CI)       | OR (95% CI)       |
|                              | 70.5 (3179)       | 29.5 (1330)                |                   |                   |
| <b>BMI, kg/m<sup>2</sup></b> |                   |                            |                   |                   |
| Underweight                  | 0.5 (17)          | 1.4 (18)                   | 2.93 (1.48–5.83)  | 2.32 (1.09–4.94)  |
| Normal                       | 30.0 (951)        | 24.5 (323)                 | Ref.              | Ref.              |
| Overweight                   | 49.4 (1,566)      | 41.4 (547)                 | 1.07 (0.91–1.26)  | 1.03 (0.86–1.23)  |
| Obesity                      | 20.1 (639)        | 32.7 (432)                 | 2.14 (1.79–2.56)  | 1.88 (1.54–2.30)  |
| <b>WC, cm</b>                |                   |                            |                   |                   |
| Normal                       | 22.6 (716)        | 17.1 (225)                 | Ref.              | Ref.              |
| Moderately high              | 28.0 (888)        | 21.3 (281)                 | 1.02 (0.83–1.25)* | 1.01 (0.81–1.26)* |
| High                         | 49.4 (1,569)      | 61.6 (812)                 | 1.69 (1.42–2.01)* | 1.45 (1.20–1.76)* |

Model 1: minimally adjusted for age and sex (\*excluding sex) at Tromsø7.

Model 2: adjusted for age, sex, educational level, smoking status, alcohol intake, comorbidities, social support, and self-perceived health (\*excluding sex) at Tromsø7.

BMI, body mass index; CI, confidence interval; OR: odds ratio; WC, waist circumference.

**Supplementary Table 5 Longitudinal association between BMI and WC, combined profiles and trajectories, and pre-frailty/frailty: The Tromsø Study 1994–2016**

|                                        | Frailty status    |                                    | Model 1            | Model 2            |
|----------------------------------------|-------------------|------------------------------------|--------------------|--------------------|
|                                        | Robust<br>(%) (n) | Pre-frail/frail<br>(≥2)<br>(%) (n) | OR (95% CI)        | OR (95% CI)        |
| <b>BMI, kg/m<sup>2</sup></b>           | n= 2925           | n= 1125                            |                    |                    |
| Underweight                            | 0.4 (10)          | 0.7 (8)                            | 2.28 (0.89–5.88)   | 1.37 (0.49–3.89)   |
| Normal                                 | 48.0 (1404)       | 40.1 (451)                         | Ref.               | Ref.               |
| Overweight                             | 43.0 (1259)       | 41.7 (469)                         | 1.16 (0.99–1.36)   | 1.16 (0.99–1.36)   |
| Obesity                                | 8.6 (252)         | 17.5 (197)                         | 2.38 (1.92–2.95)   | 2.31 (1.83–2.92)   |
| <b>WC, cm</b>                          | n= 714            | n = 387                            |                    |                    |
| Normal                                 | 51.5 (368)        | 39.0 (151)                         | Ref.               | Ref.               |
| Moderately high                        | 31.1 (222)        | 33.1 (128)                         | 1.40 (1.05–1.87)*  | 1.50 (1.10–2.05)*  |
| High                                   | 17.4 (124)        | 27.9 (108)                         | 2.10 (1.52–2.89)*  | 2.19 (1.54–3.14)*  |
| <b>BMI and WC profile, baseline</b>    | n= 650            | n = 347                            |                    |                    |
| Normal BMI and normal WC               | 36.6 (238)        | 30.8 (107)                         | Ref.               | Ref.               |
| Normal BMI and moderately high/high WC | 8.0 (52)          | 6.4 (22)                           | 0.94 (0.54–1.63)*  | 0.92 (0.50–1.66)   |
| Overweight and normal WC               | 15.4 (100)        | 9.2 (32)                           | 0.73 (0.46– 1.15)* | 0.74 (0.45– 1.20)  |
| Overweight and moderately high/high WC | 32.0 (208)        | 34.9 (121)                         | 1.31 (0.95– 1.81)* | 1.47 (1.04–2.08)   |
| Obesity and moderately high/high WC    | 8.0 (52)          | 18.7 (65)                          | 2.73 (1.77– 4.20)* | 2.91 (1.83–4.65)   |
| <b>BMI trajectories</b>                | n= 653            | n = 348                            |                    |                    |
| Stable normal BMI                      | 26.9 (176)        | 22.1 (77)                          | Ref.               | Ref.               |
| Stable overweight                      | 46.6 (304)        | 41.1 (143)                         | 1.16 (0.83–1.63)   | 1.14 (0.79–1.63)   |
| Overweight to obese                    | 22.4 (146)        | 25.9 (90)                          | 1.53 (1.04–2.24)   | 1.55 (1.02–2.35)   |
| Increasing obesity                     | 4.1 (27)          | 10.9 (38)                          | 3.35 (1.90–5.90)   | 3.17 (1.72–5.85)   |
| <b>WC trajectories (women)</b>         | n= 287            | n = 172                            |                    |                    |
| Normal to moderately high WC           | 25.5 (73)         | 20.4 (35)                          | Ref.               | Ref.               |
| Moderately high to high WC             | 50.5 (145)        | 38.9 (67)                          | 0.98 (0.60–1.62)*  | 1.12 (0.65–1.93)*  |
| Gradually increasing high WC           | 20.9 (60)         | 33.7 (58)                          | 1.99 (1.15–3.43)*  | 2.02 (1.10–3.71)   |
| Steeply increasing high WC             | 3.1 (9)           | 7.0 (12)                           | 2.63 (1.01–6.86)*  | 3.30 (1.09–10.04)* |
| <b>WC trajectories (men)</b>           | n= 366            | n = 176                            |                    |                    |
| Normal WC                              | 21.6 (79)         | 17.6 (31)                          | Ref.               | Ref.               |
| Stable moderately high WC              | 41.5 (152)        | 36.4 (64)                          | 1.09 (0.66–1.81)*  | 1.03 (0.60–1.76)*  |
| Moderately high to high WC             | 32.2 (118)        | 29.6 (52)                          | 1.17 (0.69–1.99)*  | 1.06 (0.60–1.87)*  |
| Increasing high WC                     | 4.6 (17)          | 16.5 (29)                          | 4.51 (2.17–9.38)*  | 4.36 (1.94–9.80)*  |

# Analysis was restricted to individuals who were <60 years at Tromsø4

Model 1: adjusted for age and sex (\*excluding sex) at baseline.

Model 2: adjusted for age, sex, educational level, marital/cohabitation status, smoking status, alcohol intake, social support, self-perceived health, and physical activity level (\*excluding sex) at baseline.

BMI, body mass index; CI, confidence interval; OR, odds ratio; WC, waist circumference.

**Supplementary Table 6 Longitudinal association between BMI and WC, combined profiles and trajectories, and pre-frailty/frailty (frailty score  $\geq 2$ ): The Tromsø Study 1994–2016**

|                                        | Frailty status    |                                            | Model 1           | Model 2           |
|----------------------------------------|-------------------|--------------------------------------------|-------------------|-------------------|
|                                        | Robust<br>(%) (n) | Pre-frail/frail<br>( $\geq 2$ )<br>(%) (n) | OR (95% CI)       | OR (95% CI)       |
| <b>BMI, kg/m<sup>2</sup></b>           | n= 2925           | n= 199                                     |                   |                   |
| Underweight                            | 0.4 (10)          | 0.5 (1)                                    | 1.45 (0.18–11.98) | 0.95 (0.11–7.85)  |
| Normal                                 | 48.0 (1404)       | 37.7 (75)                                  | Ref.              | Ref.              |
| Overweight                             | 43.0 (1259)       | 38.7 (77)                                  | 1.22 (0.87–1.71)  | 1.18 (0.82–1.71)  |
| Obesity                                | 8.6 (252)         | 23.1 (46)                                  | 3.47 (2.33–5.18)  | 3.27 (2.09–5.08)  |
| <b>WC, cm</b>                          | n= 714            | n = 88                                     |                   |                   |
| Normal                                 | 51.5 (368)        | 30.7 (27)                                  | Ref.              | Ref.              |
| Moderately high                        | 31.1 (222)        | 36.4 (32)                                  | 1.97 (1.15–3.38)* | 1.98 (1.10–3.54)* |
| High                                   | 17.4 (124)        | 32.9 (29)                                  | 3.20 (1.82–5.64)* | 3.18 (1.71–5.93)* |
| <b>BMI and WC profile, baseline</b>    | n= 650            | n = 81                                     |                   |                   |
| Normal BMI and normal WC               | 36.6 (238)        | 27.2 (22)                                  | Ref.              | Ref.              |
| Normal BMI and moderately high/high WC | 8.0 (52)          | 8.6 (7)                                    | 1.45 (0.59–3.59)  | 1.41 (0.52–3.86)  |
| Overweight and normal WC               | 15.4 (100)        | 3.7 (3)                                    | 0.33 (0.09– 1.13) | 0.37 (0.11– 1.31) |
| Overweight and moderately high/high WC | 32.0 (208)        | 38.3 (31)                                  | 1.65 (0.92–2.95)  | 1.81 (0.97–3.38)  |
| Obesity and moderately high/high WC    | 8.0 (52)          | 22.2 (18)                                  | 3.79 (1.89– 7.62) | 3.66 (1.71–7.81)  |

#Analysis was restricted to individuals who were <60 years at Tromsø4 and had frailty score  $\geq 2$

Model 1: adjusted for age and sex (\*excluding sex) at baseline.

Model 2: adjusted for age, sex, educational level, marital/cohabitation status, smoking status, alcohol intake, social support, self-perceived health, and physical activity level (\*excluding sex) at baseline.

BMI, body mass index; CI, confidence interval; OR, odds ratio; WC, waist circumference.

**Supplementary Table 7 Longitudinal association between BMI and WC, and pre-frailty/frailty among individuals with information on all five frailty criteria: The Tromsø Study 1994–2016**

|                              | Frailty status    |                            | Model 1           | Model 2           |
|------------------------------|-------------------|----------------------------|-------------------|-------------------|
|                              | Robust<br>(%) (n) | Pre-frail/frail<br>(%) (n) | OR (95% CI)       | OR (95% CI)       |
|                              | 70.4% (2016)      | 29.6% (848)                |                   |                   |
| <b>BMI, kg/m<sup>2</sup></b> |                   |                            |                   |                   |
| Underweight                  | 0.4 (8)           | 0.7 (6)                    | 1.98 (0.67–5.84)  | 0.97 (0.28–3.23)  |
| Normal                       | 48.4 (976)        | 40.1 (340)                 | Ref.              | Ref.              |
| Overweight                   | 42.8 (862)        | 42.9 (364)                 | 1.19 (0.99–1.42)  | 1.18 (0.97–1.43)  |
| Obesity                      | 8.4 (170)         | 16.3 (168)                 | 2.36 (1.82–3.05)  | 2.28 (1.72–3.01)  |
| <b>WC, cm</b>                | n = 600           | n = 350                    |                   |                   |
| Normal                       | 53.3 (320)        | 40.9 (143)                 | Ref.              | Ref.              |
| Moderately high              | 31.3 (188)        | 34.0 (119)                 | 1.40 (1.03–1.90)* | 1.50 (1.08–2.08)* |
| High                         | 15.3 (92)         | 25.1 (88)                  | 2.15 (1.51–3.08)* | 2.15 (1.46–3.18)* |

Model 1: adjusted for age and sex (\*excluding sex) at baseline.

Model 2: adjusted for age, sex, educational level, marital/cohabitation status, smoking status, alcohol intake, social support, self-perceived health, and physical activity level (\*excluding sex) at baseline.

BMI, body mass index; CI, confidence interval; OR, odds ratio; WC, waist circumference.

Supplementary Table 8 Longitudinal association between BMI and WC, and frailty components: The Tromsø Study 1994–2016

|                                  | Model 1<br>OR (95% CI) | Model 2<br>OR (95% CI) |
|----------------------------------|------------------------|------------------------|
| <b>Low grip strength</b>         |                        |                        |
| <b>BMI, kg/m<sup>2</sup></b>     |                        |                        |
| Underweight                      | 0.85 (0.11–6.63)       | 0.78 (0.10–6.17)       |
| Normal                           | Ref.                   | Ref.                   |
| Overweight                       | 1.45 (1.05–2.00)       | 1.34 (0.95–1.89)       |
| Obesity                          | 2.00 (1.31–3.05)       | 1.52 (0.95–2.43)       |
| <b>WC, cm</b>                    |                        |                        |
| Normal                           | Ref.                   | Ref.                   |
| Moderately high                  | 0.99 (0.58–1.68)*      | 0.92 (0.51–1.65)*      |
| High                             | 1.40 (0.81–2.43)*      | 1.37 (0.75–2.50)*      |
| <b>Low walking speed</b>         |                        |                        |
| <b>BMI, kg/m<sup>2</sup></b>     |                        |                        |
| Underweight                      | 4.51 (1.20–16.95)      | 3.03 (0.64–14.35)      |
| Normal                           | Ref.                   | Ref.                   |
| Overweight                       | 1.63 (1.12–2.37)       | 1.67 (1.12–2.48)       |
| Obesity                          | 3.32 (2.13–5.16)       | 3.15 (1.96–5.07)       |
| <b>WC, cm</b>                    |                        |                        |
| Normal                           | Ref.                   | Ref.                   |
| Moderately high                  | 2.24 (1.27–3.94)*      | 2.52 (1.38–4.63)*      |
| High                             | 2.65 (1.45–4.85)*      | 2.35 (1.19–5.63)*      |
| <b>Exhaustion</b>                |                        |                        |
| <b>BMI, kg/m<sup>2</sup></b>     |                        |                        |
| Underweight                      | 1.72 (0.22–13.18)      | 1.62 (0.20–13.24)      |
| Normal                           | Ref.                   | Ref.                   |
| Overweight                       | 1.11 (0.74–1.65)       | 1.06 (0.69–1.64)       |
| Obesity                          | 1.39 (0.793–2.42)      | 1.25 (0.69–2.27)       |
| <b>WC, cm</b>                    |                        |                        |
| Normal                           | Ref.                   | Ref.                   |
| Moderately high                  | 1.67 (0.75–3.72)*      | 1.67 (0.72–3.89)*      |
| High                             | 1.74 (0.72–4.20)*      | 1.69 (0.66–4.29)*      |
| <b>Unintentional weight loss</b> |                        |                        |
| <b>BMI, kg/m<sup>2</sup></b>     |                        |                        |
| Underweight                      | 2.84 (0.92–8.79)       | 2.15 (0.60–7.76)       |
| Normal                           | Ref.                   | Ref.                   |
| Overweight                       | 0.63 (0.49–0.82)       | 0.64 (0.49–0.85)       |
| Obesity                          | 0.68 (0.45–1.03)       | 0.70 (0.46–1.08)       |
| <b>WC, cm</b>                    |                        |                        |
| Normal                           | Ref.                   | Ref.                   |
| Moderately high                  | 0.99 (0.64–1.55)*      | 1.10 (0.70–1.73)*      |
| High                             | 0.57 (0.57–1.03)*      | 0.56 (0.30–1.07)*      |
| <b>Low physical activity</b>     |                        |                        |
| <b>BMI, kg/m<sup>2</sup></b>     |                        |                        |
| Underweight                      | –                      | –                      |
| Normal                           | Ref.                   | Ref.                   |
| Overweight                       | 1.42 (1.16–1.74)       | 1.43 (1.15–1.79)       |
| Obesity                          | 3.62 (2.81–4.68)       | 3.71 (2.80–4.90)       |
| <b>WC, cm</b>                    |                        |                        |
| Normal                           | Ref.                   | Ref.                   |
| Moderately high                  | 1.85 (1.24–2.78)*      | 1.71 (1.10–2.66)*      |
| High                             | 4.47 (2.97–6.72)*      | 4.94 (3.15–7.76)*      |

# Analysis was restricted to individuals who were <60 years at Tromsø4

Model 1: adjusted for age and sex (\*excluding sex) at baseline.

Model 2: adjusted for age, sex, educational level, marital/cohabitation status, smoking status, alcohol intake, social support, self-perceived health, and physical activity level (\*excluding sex) at baseline.

BMI, body mass index; CI, confidence interval; OR, odds ratio; WC, waist circumference.

1  
2  
3  
4  
5  
6  
7  
8  
9  
10  
11  
12  
13  
14  
15  
16  
17  
18  
19  
20  
21  
22  
23  
24  
25  
26  
27  
28  
29  
30  
31  
32  
33  
34  
35  
36  
37  
38  
39  
40  
41  
42  
43  
44  
45  
46  
47  
48  
49  
50  
51  
52  
53  
54  
55  
56  
57  
58  
59  
60

**SUPPLEMENTARY FIGURES**

For peer review only



Supplementary Figure 1 Trajectories of individuals with repeated body mass index measurements between Tromsø4 and Tromsø7: The Tromsø Study 1994–2016.

(n = 1,391)

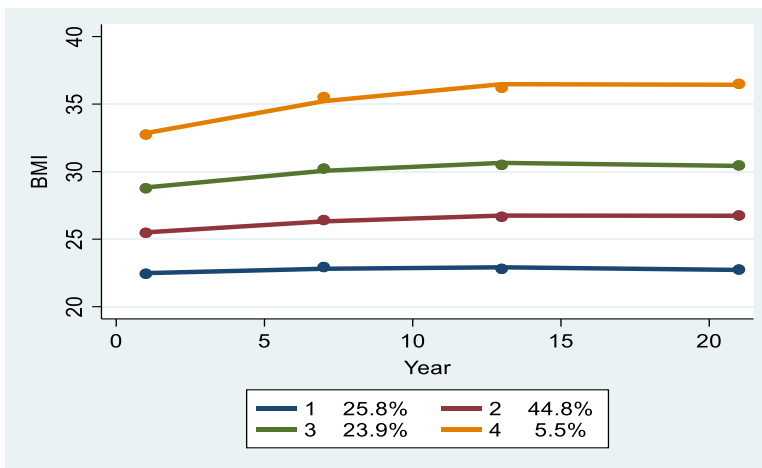

|         |                       |       |
|---------|-----------------------|-------|
| Group 1 | Stable normal weight  | 25.8% |
| Group 2 | Stable overweight     | 44.8% |
| Group 3 | Overweight to obesity | 23.9% |
| Group 4 | Increasing obesity    | 5.5%  |

Supplementary Figure 2 Trajectories of individuals with repeated waist circumference measurements between Tromsø4 and Tromsø7: The Tromsø Study 1994–2016.

(Males: n = 731; females n = 660)

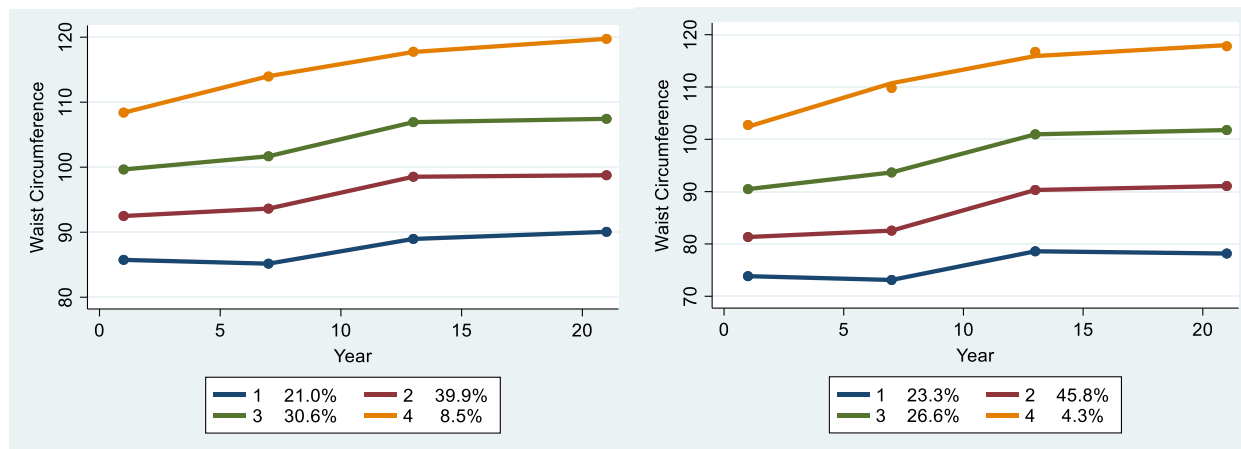

| Male    |                            |        |
|---------|----------------------------|--------|
| Group 1 | Stable normal WC           | 21.00% |
| Group 2 | Stable moderately high WC  | 39.90% |
| Group 3 | Moderately high to high WC | 30.60% |
| Group 4 | Increasing high WC         | 8.5 %  |

| Female  |                              |        |
|---------|------------------------------|--------|
| Group 1 | Stable normal WC             | 23.30% |
| Group 2 | Moderately high to high WC   | 45.80% |
| Group 3 | Gradually increasing high WC | 26.60% |
| Group 4 | Steeply increasing high WC   | 4.30%  |

## Research checklist

|                              | Item No | Content covered                                                                                                                                                                                                                                                                                                        | Page No   |
|------------------------------|---------|------------------------------------------------------------------------------------------------------------------------------------------------------------------------------------------------------------------------------------------------------------------------------------------------------------------------|-----------|
| <b>Title and abstract</b>    | 1       | (a) Indicate the study's design with a commonly used term in the title or the abstract<br>(b) Provide in the abstract an informative and balanced summary of what was done and what was found                                                                                                                          | √ (1-2)   |
| <b>Introduction</b>          |         |                                                                                                                                                                                                                                                                                                                        |           |
| Background/rationale         | 2       | Explain the scientific background and rationale for the investigation being reported                                                                                                                                                                                                                                   | √ (3)     |
| Objectives                   | 3       | State specific objectives, including any pre-specified hypotheses                                                                                                                                                                                                                                                      | √ (3)     |
| <b>Methods</b>               |         |                                                                                                                                                                                                                                                                                                                        |           |
| Study design                 | 4       | Present key elements of study design early in the paper                                                                                                                                                                                                                                                                | √ (4)     |
| Setting                      | 5       | Describe the setting, locations, and relevant dates, including periods of recruitment, exposure, follow-up, and data collection                                                                                                                                                                                        | √ (4)     |
| Participants                 | 6       | (a) Give the eligibility criteria, and the sources and methods of selection of participants. Describe methods of follow-up<br>(b) For matched studies, give matching criteria and number of exposed and unexposed<br>(c) Flow chart explaining inclusion and exclusion of participants                                 | √ (4)     |
| Variables                    | 7       | Clearly define all outcomes, exposures, predictors, potential confounders, and effect modifiers. Give diagnostic criteria, if applicable                                                                                                                                                                               | √ (4,5,6) |
| Data sources/<br>measurement | 8       | For each variable of interest, give sources of data and details of methods of assessment (measurement). Describe comparability of assessment methods if there is more than one group                                                                                                                                   | √ (4,5)   |
| Bias                         | 9       | Describe any efforts to address potential sources of bias                                                                                                                                                                                                                                                              | √ (6)     |
| Study size                   | 10      | Explain how the study size was arrived at                                                                                                                                                                                                                                                                              | √ (4)     |
| Quantitative variables       | 11      | Explain how quantitative variables were handled in the analyses. If applicable, describe which groupings were chosen and why                                                                                                                                                                                           | √ (4,5,6) |
| Statistical methods          | 12      | (a) Describe all statistical methods, including those used to control for confounding<br>(b) Describe any methods used to examine subgroups and interactions<br>(c) Explain how missing data were addressed<br>(d) If applicable, explain how loss to follow-up was addressed<br>(e) Describe any sensitivity analyses | √ (6)     |
| <b>Results</b>               |         |                                                                                                                                                                                                                                                                                                                        |           |
| Participants                 | 13      | (a) Information on participants                                                                                                                                                                                                                                                                                        | √ (4)     |
| Descriptive data             | 14      | (a) Give characteristics of study participants (eg demographic, clinical, social) and information on exposures and potential confounders<br>(b) Indicate number of participants with missing data for each variable of interest<br>(c) Summarise follow-up time (eg, average and total amount)                         | √ (7, 8)  |
| Outcome data                 | 15      | Report numbers of outcome events or summary measures over time                                                                                                                                                                                                                                                         | √ (8-11)  |

|    |                          |    |                                                                                                                                                                                                              |           |
|----|--------------------------|----|--------------------------------------------------------------------------------------------------------------------------------------------------------------------------------------------------------------|-----------|
| 1  | Main results             | 16 | (a) Give unadjusted estimates and, if applicable, confounder-adjusted estimates and their precision (eg, 95% confidence interval). Make clear which confounders were adjusted for and why they were included | √ (9-11)  |
| 2  |                          |    | (b) Report category boundaries when continuous variables were categorized                                                                                                                                    |           |
| 3  |                          |    | (c) If relevant, consider translating estimates of relative risk into absolute risk for a meaningful time period                                                                                             |           |
| 4  |                          |    |                                                                                                                                                                                                              |           |
| 5  |                          |    |                                                                                                                                                                                                              |           |
| 6  |                          |    |                                                                                                                                                                                                              |           |
| 7  |                          |    |                                                                                                                                                                                                              |           |
| 8  |                          |    |                                                                                                                                                                                                              |           |
| 9  | Other analyses           | 17 | Report other analyses done—eg analyses of subgroups and interactions, and sensitivity analyses                                                                                                               | √ (9-11)  |
| 10 |                          |    |                                                                                                                                                                                                              |           |
| 11 | <b>Discussion</b>        |    |                                                                                                                                                                                                              |           |
| 12 |                          |    |                                                                                                                                                                                                              |           |
| 13 | Key results              | 18 | Summarise key results with reference to study objectives                                                                                                                                                     | √ (11)    |
| 14 | Limitations              | 19 | Discuss limitations of the study, taking into account sources of potential bias or imprecision. Discuss both direction and magnitude of any potential bias                                                   | √ (13)    |
| 15 |                          |    |                                                                                                                                                                                                              |           |
| 16 | Interpretation           | 20 | Give a cautious overall interpretation of results considering objectives, limitations, multiplicity of analyses, results from similar studies, and other relevant evidence                                   | √ (11-14) |
| 17 |                          |    |                                                                                                                                                                                                              |           |
| 18 |                          |    |                                                                                                                                                                                                              |           |
| 19 | Generalisability         | 21 | Discuss the generalisability (external validity) of the study results                                                                                                                                        | √ (13-14) |
| 20 |                          |    |                                                                                                                                                                                                              |           |
| 21 | <b>Other information</b> |    |                                                                                                                                                                                                              |           |
| 22 | Funding                  | 22 | Give the source of funding and the role of the funders for the present study and, if applicable, for the original study on which the present article is based                                                | √ (15)    |
| 23 |                          |    |                                                                                                                                                                                                              |           |
| 24 |                          |    |                                                                                                                                                                                                              |           |
| 25 |                          |    |                                                                                                                                                                                                              |           |
| 26 |                          |    |                                                                                                                                                                                                              |           |
| 27 |                          |    |                                                                                                                                                                                                              |           |
| 28 |                          |    |                                                                                                                                                                                                              |           |
| 29 |                          |    |                                                                                                                                                                                                              |           |
| 30 |                          |    |                                                                                                                                                                                                              |           |
| 31 |                          |    |                                                                                                                                                                                                              |           |
| 32 |                          |    |                                                                                                                                                                                                              |           |
| 33 |                          |    |                                                                                                                                                                                                              |           |
| 34 |                          |    |                                                                                                                                                                                                              |           |
| 35 |                          |    |                                                                                                                                                                                                              |           |
| 36 |                          |    |                                                                                                                                                                                                              |           |
| 37 |                          |    |                                                                                                                                                                                                              |           |
| 38 |                          |    |                                                                                                                                                                                                              |           |
| 39 |                          |    |                                                                                                                                                                                                              |           |
| 40 |                          |    |                                                                                                                                                                                                              |           |
| 41 |                          |    |                                                                                                                                                                                                              |           |
| 42 |                          |    |                                                                                                                                                                                                              |           |
| 43 |                          |    |                                                                                                                                                                                                              |           |
| 44 |                          |    |                                                                                                                                                                                                              |           |
| 45 |                          |    |                                                                                                                                                                                                              |           |
| 46 |                          |    |                                                                                                                                                                                                              |           |
| 47 |                          |    |                                                                                                                                                                                                              |           |
| 48 |                          |    |                                                                                                                                                                                                              |           |
| 49 |                          |    |                                                                                                                                                                                                              |           |
| 50 |                          |    |                                                                                                                                                                                                              |           |
| 51 |                          |    |                                                                                                                                                                                                              |           |
| 52 |                          |    |                                                                                                                                                                                                              |           |
| 53 |                          |    |                                                                                                                                                                                                              |           |
| 54 |                          |    |                                                                                                                                                                                                              |           |
| 55 |                          |    |                                                                                                                                                                                                              |           |
| 56 |                          |    |                                                                                                                                                                                                              |           |
| 57 |                          |    |                                                                                                                                                                                                              |           |
| 58 |                          |    |                                                                                                                                                                                                              |           |
| 59 |                          |    |                                                                                                                                                                                                              |           |
| 60 |                          |    |                                                                                                                                                                                                              |           |

# BMJ Open

## Body mass index, waist circumference and pre-frailty/frailty: The Tromsø study 1994–2016

|                                 |                                                                                                                                                                                                                                                                                              |
|---------------------------------|----------------------------------------------------------------------------------------------------------------------------------------------------------------------------------------------------------------------------------------------------------------------------------------------|
| Journal:                        | <i>BMJ Open</i>                                                                                                                                                                                                                                                                              |
| Manuscript ID                   | bmjopen-2022-065707.R2                                                                                                                                                                                                                                                                       |
| Article Type:                   | Original research                                                                                                                                                                                                                                                                            |
| Date Submitted by the Author:   | 09-Nov-2022                                                                                                                                                                                                                                                                                  |
| Complete List of Authors:       | Uchai, Shreeshti; University of Oslo, Department of Nutrition<br>Andersen, Lene; University of Oslo, Department of Nutrition<br>Hopstock, Laila ; UiT The Arctic University of Norway, Department of<br>Community Medicine<br>Hjartaker, Anette; University of Oslo, Department of Nutrition |
| <b>Primary Subject Heading</b>: | Epidemiology                                                                                                                                                                                                                                                                                 |
| Secondary Subject Heading:      | Nutrition and metabolism, Public health                                                                                                                                                                                                                                                      |
| Keywords:                       | NUTRITION & DIETETICS, PUBLIC HEALTH, EPIDEMIOLOGY                                                                                                                                                                                                                                           |
|                                 |                                                                                                                                                                                                                                                                                              |

SCHOLARONE™  
Manuscripts



I, the Submitting Author has the right to grant and does grant on behalf of all authors of the Work (as defined in the below author licence), an exclusive licence and/or a non-exclusive licence for contributions from authors who are: i) UK Crown employees; ii) where BMJ has agreed a CC-BY licence shall apply, and/or iii) in accordance with the terms applicable for US Federal Government officers or employees acting as part of their official duties; on a worldwide, perpetual, irrevocable, royalty-free basis to BMJ Publishing Group Ltd ("BMJ") its licensees and where the relevant Journal is co-owned by BMJ to the co-owners of the Journal, to publish the Work in this journal and any other BMJ products and to exploit all rights, as set out in our [licence](#).

The Submitting Author accepts and understands that any supply made under these terms is made by BMJ to the Submitting Author unless you are acting as an employee on behalf of your employer or a postgraduate student of an affiliated institution which is paying any applicable article publishing charge ("APC") for Open Access articles. Where the Submitting Author wishes to make the Work available on an Open Access basis (and intends to pay the relevant APC), the terms of reuse of such Open Access shall be governed by a Creative Commons licence – details of these licences and which [Creative Commons](#) licence will apply to this Work are set out in our licence referred to above.

Other than as permitted in any relevant BMJ Author's Self Archiving Policies, I confirm this Work has not been accepted for publication elsewhere, is not being considered for publication elsewhere and does not duplicate material already published. I confirm all authors consent to publication of this Work and authorise the granting of this licence.



## 1 Abstract

2 **Objective:** This study investigated the association between obesity, assessed using body mass index (BMI)  
3 and waist circumference (WC), and pre-frailty/frailty among older adults over 21 years of follow-up.

4 **Design:** Prospective cohort study.

5 **Setting:** Population-based study among community-dwelling adults in Tromsø municipality, Norway.

6 **Participants:** 2340 women and 2169 men aged  $\geq 45$  years attending the Tromsø Study in 1994–1995  
7 (Tromsø4) and 2015–2016 (Tromsø7), with additional BMI and WC measurements in 2001 (Tromsø5) and  
8 2007–2008 (Tromsø6).

9 **Primary outcome measure:** Physical frailty was defined as the presence of 3 or more and pre-frailty as the  
10 presence of 1–2 of the five frailty components suggested by Fried et al.: low grip strength, slow walking  
11 speed, exhaustion, unintentional weight loss and low physical activity.

12 **Results:** Participants with baseline obesity (adjusted odds ratio [OR] 2.41, 95% confidence interval [CI]  
13 1.93–3.02), assessed by BMI, were more likely to be pre-frail/frail than those with normal BMI. Participants  
14 with high (OR 2.14, 95% CI 1.59–2.87) or moderately high (OR 1.57, 95% CI 1.21–2.03) baseline WC  
15 were more likely to be pre-frail/frail than those with normal WC. Those at baseline with normal BMI but  
16 moderately high/high WC or overweight with normal WC had no significantly increased odds for pre-  
17 frailty/frailty. However, those with both obesity and moderately high/high WC had increased odds of pre-  
18 frailty/frailty. Higher odds of pre-frailty/frailty was observed among those in "overweight to obesity" or  
19 "increasing obesity" trajectories than those with stable normal BMI. Compared with participants in a stable  
20 normal WC trajectory, those with high WC throughout follow-up were more likely to be pre-frail/frail.

21 **Conclusion:** Both general and abdominal obesity, especially over time during adulthood, is associated with  
22 an increased risk of pre-frailty/frailty in later years. Thus maintaining normal BMI and WC throughout adult  
23 life is important.

### 24 Strengths and limitations of this study:

- 25 1. This study has a long follow-up period of 21 years.
- 26 2. This study takes into account changes in body mass index (BMI) and waist circumference (WC)  
27 occurring through the follow-up period.
- 28 3. Frailty status was defined using a slightly modified version of Fried's physical frailty criteria.
- 29 4. Frailty and pre-frailty were combined as one outcome.
- 30 5. Information on frailty was only available at follow-up.



## 1 Background

2 Frailty is a dynamic multifactorial geriatric syndrome characterised by physiological deterioration,  
3 increased vulnerability and decreased resilience toward external stressors.[1,2] Frailty is associated with an  
4 increased risk of adverse events such as falls, disability, hospitalisation, reduced quality of life, and  
5 mortality.[1,2] It is preceded by pre-frailty, a multidimensional, transitional risk state.[3,4] Fried's frailty  
6 phenotype identifies pre-frailty as the presence of one or two and frailty as three or more of the five criteria:  
7 unintentional weight loss, self-reported exhaustion, weakness, slow walking speed, and low physical  
8 activity.[5] The prevalence of frailty and pre-frailty, defined using Fried's physical frailty measure,[5]  
9 among community-dwelling people aged  $\geq 50$  years across 62 countries, has been estimated to be 12% and  
10 46%, respectively.[6]

11 Rapid population ageing has become a global phenomenon.[7] Ageing is typically associated with changes  
12 in body composition, such as decreased muscle mass and redistribution of total and regional fat.[8–10]  
13 Underweight older adults with minimal reserve capacity are at risk of adverse health outcomes[5,11], and  
14 unintentional weight loss is commonly acknowledged as a significant frailty indicator.[5] However, a  
15 growing body of evidence also suggests a positive association between obesity among older adults and the  
16 risk of frailty.[10,12–16] Obesity aggravates the age-related decline in muscle strength, aerobic capacity,  
17 and physical functionality, thus worsening health and well-being.[10,11,14,17,18] It is also closely  
18 associated with metabolic disorders, inflammaging and oxidative stress, all of which have been suggested  
19 to contribute to the risk of frailty.[14,19]

20 Anthropometric measures, including body mass index (BMI) and waist circumference (WC), are simple,  
21 cost-effective tools that reflect an individual's body composition and nutritional status. They are one of the  
22 widely used nutritional items for detecting frailty.[20] BMI indicates general obesity, while WC indicates  
23 abdominal obesity. When used together, they effectively assess obesity-related risks at the population level.  
24 [21–23] Some studies have detected a U-shaped association between BMI and frailty.[13,15,24] Midlife  
25 overweight and obesity, assessed by BMI, have been associated with the risk of pre-frailty and frailty in  
26 older age.[25,26] Similarly, a positive association between high WC and frailty among older adults has been  
27 observed in some studies.[9,16,27–29] These findings are even more relevant in the present context, where  
28 obesity prevalence is increasing across all age groups, posing a global public health challenge.[30]

29 Though the evidence is expanding, there have been limited longitudinal studies exploring and comparing  
30 the relationship of both BMI and WC with the risk of developing pre-frailty and frailty over a long follow-  
31 up period.[29] Few have explored changes in BMI[31,32] and its association with frailty, while studies that  
32 consider changes in WC in association with the development of frailty seem to be lacking. Therefore, the

1 present study aimed to investigate the association of BMI and WC, separately and concurrently, with the  
2 risk of pre-frailty/frailty after 21 years of follow-up. Additionally, this study assessed changes in BMI and  
3 WC through the follow-up period and their association with pre-frailty/frailty.

## 4 **Methods**

### 5 **The Tromsø study**

6 This study uses data from the Tromsø study, an ongoing population-based study in the Tromsø municipality,  
7 Norway, consisting of seven surveys: Tromsø1 (1974), Tromsø2 (1979–1980), Tromsø3 (1986–1987),  
8 Tromsø4 (1994–1995), Tromsø5 (2001), Tromsø6 (2007–2008), and Tromsø7 (2015–2016). More than  
9 45,000 women and men have participated in at least one of the surveys.[33] The earlier surveys (Tromsø1-  
10 Tromsø3) did not include WC measurements. Therefore, the present study uses data from Tromsø4  
11 (baseline) to Tromsø7 (follow-up). Tromsø4 included 27,158 participants aged 25–97 years, Tromsø5,  
12 8,130 participants aged 30–89 years, Tromsø6, 12,984 participants aged 30–87 years, and Tromsø7, 21,083  
13 participants aged 40–99 years. The detailed information on the recruitment and the attendance of the  
14 participants has been described elsewhere.[33]

### 15 **Study sample**

16 The present study included Tromsø4 participants aged  $\geq 45$  years with valid information on BMI who also  
17 attended Tromsø7, i.e., 21 years of follow-up ( $n = 4,809$ ). Participants with missing information on three or  
18 more frailty indicators in Tromsø7 were excluded (Figure 1). Our primary analytical sample had 4,509  
19 participants. Out of these, 1,534 participants had information on WC at Tromsø4, and 1,391 had repeated  
20 measurements on both BMI and WC between Tromsø4 and Tromsø7.

### 21 **Exposure**

22 Bodyweight in kilograms and height in metres were measured wearing light clothes and no footwear. WC  
23 was measured using tape to the nearest centimetre at the umbilical level. All measurements were performed  
24 by trained personnel. BMI was calculated as the weight divided by the square of the height ( $\text{kg}/\text{m}^2$ ) and  
25 categorised as underweight ( $< 18.5 \text{ kg}/\text{m}^2$ ), normal ( $18.5\text{--}24.9 \text{ kg}/\text{m}^2$ ), overweight ( $25.0\text{--}29.9 \text{ kg}/\text{m}^2$ ), and  
26 obesity ( $\geq 30.0 \text{ kg}/\text{m}^2$ ) according to the World Health Organization (WHO) criteria.[34] WC was categorised  
27 as normal (men  $\leq 94$  cm, women  $\leq 80$  cm), moderately high (men 95–102 cm, women 81–88 cm), and high  
28 (men  $> 102$  cm, women  $> 88$  cm) according to WHO.[35]

## 1 Frailty assessment

2 A modified version of Fried et al.'s frailty phenotype[5] was used to operationalise frailty in Tromsø7.  
3 Frailty was not operationalised at baseline as complete information on frailty indicators was unavailable.

4 Five indicators were assessed at follow-up (Supplementary Table 1):

- 5 1. Unintentional weight loss: Self-reported involuntary weight loss during the last six months.[36]
- 6 2. Exhaustion: Response "pretty much" or "very much" to the question: "During the last week, have  
7 you experienced that everything is a struggle?" from the Hopkins' Symptom Checklist-10.[37]
- 8 3. Walking speed: Short Physical Performance Battery test, [38,39] where the fastest time out of two  
9 walks was selected and converted to seconds per 15 feet from seconds per 4 meters. Sex- and height-  
10 adjusted cut-offs, according to Fried et al.,[5] were used to identify participants with a low walking  
11 speed.
- 12 4. Weakness: Grip strength was measured using a newly calibrated Jamar+ Digital Dynamometer  
13 (Patterson Medical, Warrenville, IL, USA) following the Southampton protocol procedures.[40]  
14 Sex- and BMI-specific cut-offs suggested by Fried et al. [5] were used to identify participants with  
15 low grip strength.
- 16 5. Low physical activity: Response "Reading, watching TV/screen or other sedentary activity" to the  
17 question: "Describe your exercise and physical exertion in leisure time over the last year" from the  
18 Saltin–Grimby Physical Activity Level Scale for leisure-time physical activity.[41]

19 Participants were categorised as robust (0), pre-frail (1-2) and frail ( $\geq 3$ ) based on the number of frailty  
20 indicators present.

## 21 Covariates

22 The potential covariates in this study were selected based on the existing knowledge and literature on frailty  
23 status. Sociodemographic characteristics included age, sex, educational level [primary/partly secondary  
24 education (up to 10 years of schooling), upper secondary education (minimum of 3 years), college/university  
25 short (<4 years), and college/university long ( $\geq 4$  years)], and marital/cohabitation status (married/cohabiting  
26 or single/not cohabiting with a partner). Self-reported smoking status was categorised as current, former, or  
27 never smoker. Self-reported alcohol intake level was categorised as never-drinker, infrequent drinker (<2–  
28 4 times/month), and frequent drinker (>2–3 times/week). Comorbidity was defined using Charlson's  
29 comorbidity index[42] without weighting of the diseases. It was categorised as "no comorbidity" and  
30 "comorbidity" based on the self-reported presence of coronary heart disease (angina pectoris/myocardial  
31 infarction), stroke, diabetes, cancer, pulmonary disease (asthma/chronic bronchitis/emphysema), and peptic  
32 ulcer. Social support was categorised as self-reported "not enough good friends" or "enough good friends."

1  
2  
3 1 Self-perceived health status was categorised as "poor" or "good." Baseline physical activity level was  
4 2 categorised as no/low physical activity (0 hours/week spent in hard physical activity or  $\leq 2$  hours/week spent  
5 3 in light physical activity) and high physical activity ( $\geq 1$  hour/week in hard physical activity or  $\geq 3$   
6 4 hours/week in light physical activity).

## 5 **Statistical analysis**

6 The sociodemographic and lifestyle factors at baseline across robust and pre-frail/frail groups were  
7 7 described using mean and standard deviation for continuous variables and proportion and count for  
8 8 categorical variables. The differences between the two groups were tested using the student's *t*-test for  
9 9 continuous variables and the chi-square test for categorical variables.

10 Multivariable logistic regression analysis was used to assess the effect of BMI and WC on pre-frailty/frailty  
11 11 at follow-up. Five different longitudinal associations were assessed: baseline BMI and pre-frailty/frailty;  
12 12 baseline WC and pre-frailty/frailty; joint BMI and WC profile at baseline and pre-frailty/frailty; BMI  
13 13 trajectories and pre-frailty/frailty; WC trajectories and pre-frailty/frailty. The models were minimally  
14 14 adjusted for age and sex (Model 1) and further adjusted for educational level, marital/cohabitation status,  
15 15 smoking status, alcohol intake, social support, self-perceived health, and physical activity level at baseline  
16 16 (Model 2). The adjustment variables were selected using a stepwise backward regression procedure. No  
17 17 significant collinearity or interaction was detected between covariates in the model.

18 Group-based trajectory modelling (GBTM) was conducted among 1,391 participants to assess changes in  
19 19 the BMI and WC throughout the 21-year follow-up period, with measurements on both BMI and WC  
20 20 [available](#) at Tromsø4, Tromsø5, Tromsø6 and Tromsø7. GBTM, also known as latent class growth analysis,  
21 21 is a semi-parametric technique that identifies distinct subgroups of individuals following a similar pattern  
22 22 of change over time on a given variable, using finite mixtures of defined probability distributions.[43]  
23 23 Different models with varying numbers of trajectory groups, varying functional forms and orders were  
24 24 compared. The most appropriate model was selected based on the Bayesian Information Criterion[44] and  
25 25 then introduced into longitudinal multivariable logistic regression models. The distinct BMI and WC  
26 26 trajectories were named based on their observed pattern. The WC trajectories were sex-stratified due to  
27 27 varying cut-off levels for men and women.

28 A new variable with five distinct strata (normal BMI and normal WC; normal BMI and moderately  
29 29 high/high WC; overweight and low WC; overweight and moderately high/high WC; obesity and moderately  
30 30 high/high WC) was formed by combining different categories of BMI and WC. They were then introduced  
31 31 into the multivariable models to assess the concurrent effects of BMI and WC on frailty status. While

1 forming the new joint variable, the underweight group was removed because of low prevalence (<1%), and  
2 moderately high and high WC groups were combined because of their low sample size when stratified.

3 Additional supplementary analyses were carried out. The cross-sectional association between BMI and WC  
4 level and frailty status at Tromsø7 was assessed. Since pre-frailty/frailty could not be assessed at baseline,  
5 the primary longitudinal analyses were repeated in a sub-population ( $n= 4,050$ ), excluding participants aged  
6 60 years and older at Tromsø4 who might have had an increased probability of being pre-frail/frail at that  
7 time point. The majority of the participants in the pre-frail/frail group had a frailty score of 1. In order to  
8 account for potential misclassification, analyses were performed on a further restricted sub-sample with a  
9 frailty score  $\geq 2$  at Tromsø7 ( $n= 3,124$ ). The primary longitudinal analyses were also repeated among the  
10 subgroup of participants with non-missing information on all five frailty components ( $n = 2,864$ ), and the  
11 association of obesity with each frailty component were assessed.

12 All the statistical analyses were conducted using STATA 16.[45] Statistical significance was set at  $P < 0.05$ .  
13 The results are expressed as adjusted odds ratios (ORs) with 95% confidence intervals (CIs).

## 14 Patient and public involvement

15 Patients and the public were not involved in this research's design, conduct, reporting, or dissemination  
16 plans.

## 17 Results

### 18 Study population

19 The mean age at baseline was 51.6 years, and the participants were followed up for 21 years. 28.4% of the  
20 participants were pre-frail, 1.1% were frail, and 70.5% were robust at follow-up (Table 1). In total, 50.6%  
21 of the robust group and 55.0% of the pre-frail/frail group were women. Most robust and pre-frail/frail  
22 participants were either married or cohabiting (84.3% and 80.3%) and reported having enough good friends  
23 (83.1% and 80.5%) at baseline. All the baseline characteristics, except comorbidity, were significantly  
24 different in the robust and the pre-frail/frail groups (Table 1).

25 When assessed at follow-up, all the sociodemographic, lifestyle and disease-related factors were  
26 significantly associated with pre-frailty/frailty (Supplementary Table 2). When the eligible participants lost  
27 to follow-up ( $n = 8,649$ ) were compared with the attendees, they were found to be older (mean age 63.2  
28 years) with a less healthy lifestyle and higher comorbidities (Supplementary Table 3).

## 1 BMI and WC

2 At baseline, the proportion of individuals with underweight was low (<1%) (Table 2). The proportion of  
 3 individuals with normal BMI was higher among the robust group than the pre-frail/frail group (47.6% versus  
 4 39.3%), whereas the proportion of individuals with obesity was higher among the pre-frail/frail group  
 5 (17.1% versus 8.4%). The robust group had a higher proportion of individuals with normal WC than the  
 6 pre-frail/frail group (51.5% versus 37.3%), whereas the pre-frail/frail group had a higher proportion of  
 7 individuals with high WC (27.7% versus 17.4%). A similar distribution of different BMI and WC categories  
 8 across robust and pre-frail/frail groups was observed at follow-up (Supplementary Table 2). Both robust  
 9 and pre-frail/frail groups at follow-up had an increased proportion of individuals with obesity and high WC  
 10 compared with baseline (Table 2; Supplementary Table 2).

11 **Table 1 Baseline characteristics of participants by frailty status at follow-up: The Tromsø Study 1994–2016**

|                                             | Frailty status                    |                                            | P value            |
|---------------------------------------------|-----------------------------------|--------------------------------------------|--------------------|
|                                             | Robust<br>(% (n))<br>70.5 (3,179) | Pre-frail/frail<br>(% (n))<br>29.5 (1,330) |                    |
| Age in years, mean (SD)                     | 51.1 (5.1)                        | 52.8 (5.9)                                 | 0.000 <sup>a</sup> |
| <b>Women</b>                                | 50.6 (1,608)                      | 55.0 (732)                                 | 0.006              |
| <b>Smoking status</b>                       |                                   |                                            |                    |
| Current smokers                             | 27.0 (858)                        | 33.7 (448)                                 |                    |
| Former smokers                              | 36.1 (1,149)                      | 34.0 (452)                                 | 0.001              |
| Never                                       | 36.9 (1,172)                      | 32.3 (430)                                 |                    |
| <b>High physical activity level</b>         | 69.5 (2,210)                      | 56.9 (756)                                 | 0.001              |
| <b>Married or cohabiting</b>                | 84.3 (2,679)                      | 80.3 (1,068)                               | 0.001              |
| <b>Self-perceived health – good</b>         | 75.4 (2,394)                      | 61.5 (818)                                 | <0.001             |
| <b>Social support – enough good friends</b> | 83.1 (2,404)                      | 80.5 (976)                                 | 0.041              |
| <b>Educational level</b>                    |                                   |                                            |                    |
| Primary/Partly secondary                    | 32.8 (1,041)                      | 42.4 (562)                                 |                    |
| Upper secondary                             | 34.3 (1,085)                      | 34.2 (453)                                 | <0.001             |
| College/University short                    | 16.5 (524)                        | 12.8 (169)                                 |                    |
| College/University long                     | 16.4 (520)                        | 10.6 (141)                                 |                    |
| <b>Alcohol intake</b>                       |                                   |                                            |                    |
| Never/Abstaining                            | 9.0 (286)                         | 11.9 (158)                                 |                    |
| Infrequent drinker                          | 76.2 (2,419)                      | 76.6 (1,015)                               | <0.001             |
| Frequent drinker                            | 14.8 (468)                        | 11.5 (152)                                 |                    |
| <b>Prevalent diseases</b>                   |                                   |                                            |                    |
| Pulmonary disease <sup>b</sup>              | 8.6 (272)                         | 9.5 (126)                                  | 0.323              |
| Coronary heart disease <sup>c</sup>         | 2.3 (73)                          | 4.5 (59)                                   | <0.001             |
| Diabetes                                    | 0.4 (12)                          | 0.6 (8)                                    | 0.300              |
| Cancer                                      | 2.8 (79)                          | 3.5 (42)                                   | 0.210              |
| Stroke                                      | 0.6 (19)                          | 0.8 (11)                                   | 0.386              |
| Peptic ulcer                                | 7.0 (197)                         | 8.9 (105)                                  | 0.033              |
| <b>Comorbidity</b>                          | 1.9 (59)                          | 2.7 (36)                                   | 0.070              |

Values are percentages (numbers); P value:  $\chi^2$  test for categorical variables; P value: <sup>a</sup>Student's t-test; <sup>b</sup>including asthma/chronic bronchitis/emphysema; <sup>c</sup>including angina pectoris/myocardial infarction.



When BMI and WC level was assessed jointly at baseline (Table 3), the robust group had a higher proportion of individuals with both BMI and WC in the normal range than the pre-frail/frail group (36.1% versus 29.1%). The proportion of individuals with both obesity and moderately high/ high WC was higher among the pre-frail/frail group (16.9% versus 7.4%).

The GBTM resulted in four distinct trajectories of BMI ( $n = 1391$ ): stable normal BMI (25.8%), stable overweight (44.8%), overweight to obesity (23.9%), and increasing obesity (5.5%) (Supplementary Figure 1). The increasing obesity trajectory included individuals with BMI  $\geq 30$  kg/m<sup>2</sup> at baseline, which kept increasing to a higher obesity level, i.e., BMI  $\geq 35$  kg/m<sup>2</sup>. Four distinct WC trajectories were identified for both women ( $n = 660$ ) and men ( $n = 731$ ) (Supplementary Figure 2). The WC trajectories for women were: stable normal WC (23.3%), moderately high to high WC (45.8%), gradually increasing high WC (26.6%), and steeply increasing high WC (4.3%). The WC trajectories for men were: stable normal WC (21.0%), stable moderately high WC (39.9%), moderately high to high WC (30.6%), and increasing high WC (8.5%).

### BMI, WC, and pre-frailty/frailty

Individuals who had obesity (OR 2.41, 95% CI 1.93–3.02) or overweight (OR 1.19, 95% CI 1.02–1.39) at baseline had significantly higher odds of becoming pre-frail/frail at follow-up compared with individuals with normal BMI (Model 2, Table 2). No statistically significant association was detected between underweight group and the odds of pre-frailty/frailty; however, the number of underweight individuals was insufficient to reach any conclusion. Participants with moderately high WC (OR 1.57, 95% CI 1.21–2.03) or high WC (OR 2.16, 95% CI 1.59–2.87) at baseline had higher odds of becoming pre-frail/frail at follow-up compared to individuals with a normal WC (Model 2, Table 2).

The supplementary cross-sectional analysis (Supplementary Table 4) indicated a significant association between obesity and pre-frailty/frailty among older adults (OR 1.88, 95% CI 1.54–2.30), whereas no association was detected between overweight and pre-frailty/frailty. As for WC, only high WC was associated with increased odds of pre-frailty/frailty (OR 1.45, 95% CI 1.20–1.76) in the cross-sectional analysis.

**Table 2 Longitudinal association between BMI and WC, and pre-frailty/frailty: The Tromsø Study 1994–2016**

|                              | Frailty status    |                            |                        |                        |
|------------------------------|-------------------|----------------------------|------------------------|------------------------|
|                              | Robust<br>(% (n)) | Pre-frail/frail<br>(% (n)) | Model 1<br>OR (95% CI) | Model 2<br>OR (95% CI) |
| <b>BMI, kg/m<sup>2</sup></b> | 70.5 (3179)       | 29.5 (1330)                |                        |                        |
| Underweight                  | 0.3 (11)          | 0.7 (9)                    | 2.15 (0.88–5.29)       | 1.32 (0.49–3.54)       |

|                 |                |                |                   |                   |
|-----------------|----------------|----------------|-------------------|-------------------|
| Normal          | 47.6 (1,513)   | 39.3 (522)     | Ref.              | Ref.              |
| Overweight      | 43.7 (1,388)   | 43.0 (572)     | 1.18 (1.02–1.36)  | 1.19 (1.02–1.39)  |
| Obesity         | 8.4 (267)      | 17.0 (227)     | 2.42 (1.98–2.98)  | 2.41 (1.93–3.02)  |
| <b>WC, cm</b>   | <i>n</i> = 952 | <i>n</i> = 582 |                   |                   |
| Normal          | 51.5 (490)     | 37.3 (217)     | Ref.              | Ref.              |
| Moderately high | 31.1 (296)     | 35.0 (204)     | 1.54 (1.21–1.96)* | 1.57 (1.21–2.03)* |
| High            | 17.4 (166)     | 27.7 (161)     | 2.16 (1.65–2.83)* | 2.14 (1.59–2.87)* |

Model 1: adjusted for age and sex (\*excluding sex) at baseline.

Model 2: adjusted for age, sex, educational level, marital/cohabitation status, smoking status, alcohol intake, social support, self-perceived health, and physical activity level (\*excluding sex) at baseline.

BMI, body mass index; CI, confidence interval; OR: odds ratio; WC, waist circumference.

**BMI categories**

Underweight: <18.5 kg/m<sup>2</sup>

Normal: 18.5–24.9 kg/m<sup>2</sup>

Overweight: 25.0–29.9 kg/m<sup>2</sup>

Obesity: ≥30 kg/m<sup>2</sup>

**WC categories**

Normal: men ≤94 cm; women ≤80 cm

Moderately high: men 95–102 cm; women 81–88 cm

High: men >102 cm; women >88 cm

The longitudinal model that included joint BMI and WC profile at baseline showed that participants who had overweight with moderately high/high WC (OR 1.48, 95% CI 1.11–1.98) or participants who had obesity with moderately high/high WC (OR 3.11, 95% CI 2.07–4.70) had higher odds of being pre-frail/frail compared with participants with normal BMI and normal WC (Model 2, Table 3). No significant association with pre-frailty/frailty was detected among participants who had normal BMI with moderately high/high WC or overweight with normal WC at baseline.

The sensitivity analyses restricted to participants with baseline age <60 years (Supplementary Table 5) and further restricted to those with a frailty score ≥2 at follow-up (Supplementary Table 6) confirmed the higher odds of pre-frailty/frailty among participants with baseline obesity and/or moderately high/high WC. However, no significant association was detected between participants in overweight category and pre-frailty/frailty. The sensitivity analysis among participants with complete information on all five frailty components (Supplementary Table 7) also generated similar results.

**Table 3 Association between combined BMI and WC profiles, and pre-frailty/frailty: The Tromsø Study 1994–2016**

| Longitudinal                           | Frailty status    |                            | Model 1<br>OR (95% CI) | Model 2<br>OR (95% CI) |
|----------------------------------------|-------------------|----------------------------|------------------------|------------------------|
|                                        | Robust<br>(% (n)) | Pre-frail/frail<br>(% (n)) |                        |                        |
| <b>BMI and WC profile, baseline</b>    | 62.8 (870)        | 37.2 (515)                 |                        |                        |
| Normal BMI and normal WC               | 36.1 (314)        | 29.1 (150)                 | Ref.                   | Ref.                   |
| Normal BMI and moderately high/high WC | 8.4 (73)          | 8.0 (41)                   | 1.13 (0.73–1.74)       | 1.01 (0.63–1.61)       |
| Overweight and normal WC               | 15.9 (139)        | 9.5 (49)                   | 0.74 (0.50–1.08)       | 0.79 (0.53–1.19)       |
| Overweight and moderately high/high WC | 32.2 (280)        | 36.5 (188)                 | 1.40 (1.07–1.84)       | 1.48 (1.11–1.98)       |
| Obesity and moderately high/high WC    | 7.4 (64)          | 16.9 (87)                  | 2.86 (1.96–4.18)       | 3.11 (2.07–4.70)       |

Model 1: adjusted for age at baseline.

Model 2: adjusted for age, educational level, marital/cohabitation status, smoking status, alcohol intake, social support, self-perceived health, and physical activity level at baseline.



BMI, body mass index; CI, confidence interval; OR: odds ratio; WC, waist circumference.

The model with BMI trajectories (Model 2, Table 4) indicated higher odds of pre-frailty/frailty among participants in the overweight to obesity trajectory (OR 1.67, 95% CI 1.19–2.35) or those in the constantly increasing obesity trajectory (OR 3.12, 95% CI 1.80–5.41), compared with those in the stable normal BMI trajectory. Contrarily, there was no significant association in the stable overweight category. The model with WC trajectories (Model 2, Table 4) showed that women in the gradually increasing high WC trajectory (OR 2.17, 95% CI 1.32–3.59) or the steeply increasing high WC trajectory (OR 4.09, 95% CI 1.54–10.90) had higher odds of being pre-frail/frail compared with women in the normal WC trajectory. Similarly, men in the increasing high WC trajectory (OR 3.36, 95% CI 1.71–6.59) had higher odds of pre-frailty/frailty compared with men in the normal WC trajectory. The same trend in the association between different BMI and WC trajectories and pre-frailty/frailty was observed in sensitivity analyses restricted to participants with baseline age <60 years (Supplementary Table 5).

When the association was assessed separately for each frailty component (Supplementary Table 8), overweight or obesity at baseline was associated with higher odds of slow walking speed, low physical activity and low grip strength at follow-up. However, the association between BMI and grip strength was no longer significant in the fully adjusted model. Moderately high or high WC at baseline was associated with higher odds of slow walking speed and low physical activity.

**Table 4 Association between BMI and WC trajectories and pre-frailty/frailty: The Tromsø study 1994–2016**

|                                | Frailty status    |                            | Model 1           | Model 2            |
|--------------------------------|-------------------|----------------------------|-------------------|--------------------|
|                                | Robust<br>(% (n)) | Pre-frail/frail<br>(% (n)) | OR (95% CI)       | OR (95% CI)        |
|                                | 62.8 (874)        | 37.2 (517)                 |                   |                    |
| <b>BMI trajectories</b>        |                   |                            |                   |                    |
| Stable normal BMI              | 27.8 (243)        | 22.4 (116)                 | Ref.              | Ref.               |
| Stable overweight              | 46.6 (407)        | 42.4 (219)                 | 1.20 (0.91–1.59)  | 1.21 (0.90–1.62)   |
| Overweight to obese            | 21.8 (191)        | 26.5 (137)                 | 1.62 (1.18–2.22)  | 1.67 (1.19–2.35)   |
| Increasing obesity             | 3.8 (33)          | 8.7 (45)                   | 3.07 (1.85–5.09)  | 3.12 (1.80–5.41)   |
|                                | 59.4 (392)        | 40.6 (268)                 |                   |                    |
| <b>WC trajectories (women)</b> |                   |                            |                   |                    |
| Stable normal WC               | 26.3 (103)        | 17.5 (47)                  | Ref.              | Ref.               |
| Moderately high to high WC     | 49.7 (195)        | 42.5 (114)                 | 1.27 (0.84–1.94)* | 1.30 (0.83–2.05)*  |
| Gradually increasing high WC   | 20.9 (82)         | 33.6 (90)                  | 2.34 (1.47–3.70)* | 2.17 (1.32–3.59)*  |
| Steeply increasing high WC     | 3.1 (13)          | 6.3 (17)                   | 3.04 (1.34–6.90)* | 4.09 (1.54–10.90)* |
|                                | 65.9 (482)        | 34.1 (249)                 |                   |                    |
| <b>WC trajectories (men)</b>   |                   |                            |                   |                    |
| Stable normal WC               | 22.4 (108)        | 18.1 (45)                  | Ref.              | Ref.               |
| Stable moderately high WC      | 41.1 (198)        | 38.5 (96)                  | 1.18 (0.77–1.80)* | 1.12 (0.72–1.76)*  |
| Moderately high to high WC     | 31.5 (152)        | 28.9 (72)                  | 1.18 (0.75–1.85)* | 1.12 (0.69–1.79)*  |
| Increasing high WC             | 5.0 (24)          | 14.5 (36)                  | 3.73 (1.99–6.97)* | 3.36 (1.71–6.59)*  |

Model 1: adjusted for age and sex at baseline (\*adjusted for age only).

Model 2: adjusted for age, sex, educational level, marital/cohabitation status, smoking status, alcohol intake, social support, self-perceived health, and physical activity level (\*excluding sex) at baseline.  
BMI, body mass index; CI, confidence interval; OR: odds ratio; WC, waist circumference.

---

## 1 Discussion

2 The present study followed 4,509 community-dwelling participants from the population-based Tromsø  
3 Study from 1994 to 2016 to examine the association between general and abdominal obesity and the risk of  
4 frailty. This study suggests an increased likelihood of pre-frailty/frailty among those with baseline obesity.  
5 Increased likelihood of pre-frailty/frailty was also observed among those with high or moderately high WC  
6 at baseline. When assessed jointly, participants with both obesity and moderately high/high WC at baseline  
7 had increased odds of being pre-frail/frail compared to those with BMI and WC in the normal range.  
8 Participants in the "overweight to obesity" or the "increasing obesity" trajectories had increased odds of pre-  
9 frailty/frailty compared with those in the stable normal BMI trajectory. Additionally, participants with a  
10 high WC at baseline, whose WC gradually or steeply increased throughout the follow-up period, had  
11 increased odds of being pre-frail/frail compared with those in a stable normal WC trajectory.

12 Our conclusions align with the findings from two previous longitudinal studies with a similar follow-up  
13 period (26 and 22 years) that reported a significant positive association between midlife overweight or  
14 obesity and the development of pre-frailty and frailty in later life.[25,26] However, we should be cautious  
15 while interpreting the association between baseline overweight BMI and pre-frailty/frailty. In our study, this  
16 association was not significant in the sensitivity analyses where we excluded participants aged 60 years and  
17 older at baseline. A prospective study with a follow-up period of 3.5 years observed a significantly increased  
18 risk of frailty among underweight women and women with overweight and obesity.[24] No significant  
19 association between baseline underweight status and risk of pre-frailty/frailty was detected in our study.  
20 However, the number of underweight individuals in our study was too low, resulting in a low statistical  
21 power to reach any conclusion. In terms of WC and frailty status, similar to our results, a positive association  
22 between higher WC and frailty among older adults was reported by a 3.5-year follow-up study from two  
23 prospective Spanish cohorts.[29] A positive association between high WC and frailty was observed in a few  
24 other studies;[9,16,27] however, they were cross-sectional and used slightly different cut-offs to categorise  
25 WC. We identified BMI and WC trajectories to account for the dynamic change in the adiposity level that  
26 might occur during adulthood. In line with our findings regarding BMI trajectories, comparable trajectories  
27 and observations about a higher risk of pre-frailty and frailty among those with increasing BMI were  
28 observed in a 26-year follow-up study.[32] A large study that followed adults aged  $\geq 51$  years for ten years  
29 reported a higher incidence of frailty among weight gain class, weight loss class, and consistent obesity  
30 class.[31] Literature on long-term changes in WC and its association with frailty seems lacking. Few

1 epidemiological studies have explored the combined effect of BMI and WC on frailty among older adults.  
2 Two studies conducted among adults aged  $\geq 65$  years in Portugal[46] and  $\geq 60$  years in Spain[29] observed  
3 a positive association between frailty and adiposity only when the individuals had both a high WC and a  
4 high BMI. It aligns with our results to a certain extent, as we observed an increased likelihood of pre-  
5 frailty/frailty among individuals with both obesity and moderately high/high WC at baseline. We also  
6 observed higher odds of pre-frailty/frailty among those who had overweight with a moderately high/high  
7 WC at baseline. However, this association was not significant in the sensitivity analyses where we excluded  
8 participants aged 60 years and older at baseline. On the contrary, high WC was reported to be associated  
9 with frailty regardless of their BMI categories by two cross-sectional studies conducted among community-  
10 dwelling adults aged  $\geq 65$  years in China[27] and England,[15] indicating WC to be better linked with frailty.  
11 Notably, participants who had normal BMI with moderately high/high WC or those who had overweight  
12 with normal WC did not have significantly increased odds of pre-frailty/frailty in our study. This finding  
13 indicates the importance of considering both BMI and WC to identify the risk of frailty.

14 There are different mechanisms through which obesity might contribute to pre-frailty/frailty. Increased  
15 adiposity leads to increased secretion of pro-inflammatory adipokines, thus contributing to  
16 inflammation,[14,19] which is also associated with frailty among older adults.[47] Obesity leads to  
17 increased fat mass and increased lipid infiltration in muscle fibres resulting in reduced muscle strength and  
18 function.[14,48] When coupled with an age-related decline in muscle mass and strength, it causes  
19 "sarcopenic obesity", which is linked to an increased risk of frailty and disability.[19,49,50] Grip strength,  
20 often used as a proxy for muscle strength in older adults, was found to be associated with baseline  
21 overweight and obesity assessed using BMI in our study. However, the association was no longer significant  
22 when further adjusted for potential covariates. Slow walking speed and low physical activity, which often  
23 represent lower physical functioning at an older age, were significantly associated with baseline BMI and  
24 WC. The primary strength of this study is its prospective design with a long follow-up period of two decades.  
25 However, several changes in participant's lifestyle, diet, habits, and physical and psycho-social  
26 environments might have occurred during this period. We could not account for these factors, which  
27 potentially impacted the development of pre-frailty/frailty. So, the result of this study should be cautiously  
28 interpreted in light of these contextual issues. We used BMI and WC to define general and abdominal  
29 obesity. BMI is often criticised for its inability to provide information on fat distribution,[22] while WC is  
30 criticised for its limitation in distinguishing between visceral and subcutaneous fat.[51] However, they are  
31 effective in assessing obesity-related risks at the population level.[21,22] A study among Tromsø7  
32 participants aged  $\geq 40$  years found a strong correlation between BMI and visceral adipose tissue (VAT) mass  
33 and WC and VAT mass. It also concluded them to be a satisfactory substitute to identify cardiometabolic  
34 risk.[23] Further, they are simple to measure, easy to replicate, and widely used in routine health

1  
2  
3 1 assessments, thus, helping identify individuals at risk of frailty to provide timely interventions. The repeated  
4 2 measures on BMI and WC allowed us to account for changes in participants' obesity status through the  
5 3 follow-up period and gain a comprehensive understanding of the long-term effects of these exposures on  
6 4 the risk of frailty in later life. However, we could not account for the development and change in frailty  
7 5 status that might have occurred over time as repeated measures on frailty were unavailable. Our outcome  
8 6 was physical frailty, assessed using Fried et al.'s frailty phenotype definition.[5] Though widely used,[52]  
9 7 it defines frailty from the unidimensional perspective of reduced physical functioning and declining  
10 8 physiological reserves. In the context where frailty is being recognised as a multidimensional construct  
11 9 encompassing not just physical but also cognitive, social and psychological dimensions [53], the scope of  
12 10 our results focusing just on physical aspects of frailty might be limited. This study's objectively measured  
13 11 physical frailty components (low grip strength and low walking speed) aligned with Fried's definition;  
14 12 however, the questionnaires for self-reported components (exhaustion, low physical activity and  
15 13 unintentional weight loss) varied slightly. Each frailty indicator we utilised has been validated in different  
16 14 research contexts.[36–38,41] The self-reported frailty components are nevertheless prone to information  
17 15 bias. A systematic review that investigated 262 physical frailty phenotypes acknowledged that modifications  
18 16 in the definition of frailty phenotype are common and have an important impact on the classification and  
19 17 predictive ability of the definition.[54] A fair agreement has been reported between Fried's definition and  
20 18 the completely questionnaire-based physical frailty definition.[55,56]

21 19 The main limitation of our study is the selection bias resulting from differential loss to follow-up. Those  
22 20 lost to follow-up were comparatively older and had a higher proportion of general and abdominal obesity  
23 21 and other potential risk factors for frailty. This might have led to a lower prevalence of frailty in Tromsø7.  
24 22 In total, 1.1% of the participants aged  $\geq 66$  years at Tromsø7 were frail, and 28.4% were pre-frail which is  
25 23 much lower than the pooled prevalence estimates provided by O'Caomh et al.[6] It aligns with the findings  
26 24 from a study where the grip strengths of Tromsø7 participants and Russian Know Your Heart study  
27 25 participants aged 40-69 years were compared. The average Norwegian participant had a mean grip strength  
28 26 comparable to a seven-year younger Russian counterpart.[57] This indicates that the nordic population  
29 27 might be comparatively healthier,[58] thus limiting the generalisability of our findings to other populations  
30 28 across the globe. Only a sub-sample of our study population had information on both BMI and WC, and an  
31 29 even lower number had repeated measurements available for both exposures. Therefore, the models  
32 30 including both BMI and WC might have low statistical power, particularly when considering the repeated  
33 31 measures. Information on frailty measures was not available at baseline. However, most participants were  
34 32 in their mid-life (median age 50) at baseline, lowering their likelihood of having frailty components. The  
35 33 sensitivity analyses, where we excluded participants aged  $\geq 60$  years from baseline as a proxy for exclusion  
36 34 of pre-frail/frail individuals, showed a similar trend in the association between baseline obesity, assessed

1  
2  
3 1 using BMI and WC, and pre-frailty/frailty at an older age. We adjusted for several confounding factors;  
4 2 however, the potential for residual confounding remains. Most covariates in our study, including  
5 3 comorbidity, were self-reported.  
6  
7

8 4 We combined pre-frailty and frailty as a single outcome because of the low frailty prevalence in this study.  
9 5 The pre-frail/frail population in this study is primarily pre-frail with a frailty score of 1, half of which were  
10 6 the ones with low physical activity. So, misclassification of comparatively healthier but less active  
11 7 participants with severely pre-frail/frail participants might have occurred. The sensitivity analyses on  
12 8 participants with  $\geq 2$  frailty score, which mostly supported results from the primary analysis, addressed this  
13 9 issue to some extent. It would have been informative to assess the association with pre-frailty and frailty  
14 10 separately. Nevertheless, understanding factors associated with pre-frailty is highly relevant because pre-  
15 11 frailty is gaining broader interest as an ideal opportunity for administering timely intervention to delay or  
16 12 reverse frailty and the associated adverse outcomes.[59] Of note, as our outcome pre-frailty/frailty is  
17 13 common, the OR estimates obtained might slightly overestimate the relative risk, and caution should be  
18 14 applied while interpreting it as a risk.  
19  
20  
21  
22  
23  
24  
25  
26

27 15 In the context where the population is rapidly ageing and the obesity epidemic is rising, growing evidence  
28 16 recognises the subgroup of "fat and frail" older individuals in contrast to viewing frailty only as a wasting  
29 17 disorder.[12,15,26] In this study, participants with both high BMI and high WC, i.e., general and abdominal  
30 18 obesity, especially for a long duration throughout their adulthood, were observed to have an increased  
31 19 likelihood of pre-frailty/frailty. It highlights the importance of routinely assessing and maintaining optimal  
32 20 BMI and WC throughout adulthood to lower the risk of frailty in older age.  
33  
34  
35  
36  
37  
38  
39  
40  
41  
42  
43  
44  
45  
46  
47  
48  
49  
50  
51  
52  
53  
54  
55  
56  
57  
58  
59  
60

## 1 Funding

2 This work was supported by the Throne Holst Foundation (Grant number N/A) and the Institute of Basic  
3 Medical Sciences, University of Oslo (Grant number N/A). The project also received funding from  
4 Aktieselskabet Freia Chocolate Fabriks Medisinske fond (Grant number N/A). The funders had no role in  
5 the research manuscript's design, conduct, analysis, interpretation, or drafting.

## 6 Acknowledgements

7 We thank the NutriFrail team for their support and the Tromsø Study team for their cooperation in data  
8 acquisition.

## 9 Competing Interest

10 None declared.

## 11 Ethical approval

12 The Tromsø Study was approved by the Regional Committee of Medical and Health Research Ethics (REK)  
13 North and the Norwegian Data Protection Authority. Approvals from REK (ref. 2021/234146) and the  
14 Norwegian Centre for Research Data (NSD) (ref. 364331) were obtained for this particular study.

## 15 Contributions

16 SU was responsible for conceptualisation, data acquisition, analysis, interpretation, writing original draft,  
17 review and editing; LFA was responsible for conceptualisation, funding acquisition, supervision, writing  
18 critical review and editing; LAH was responsible for data acquisition for the Tromsø Study, constant  
19 coordination, writing critical review and editing; AH was responsible for conceptualisation, funding  
20 acquisition, data acquisition, supervision, writing critical review and editing.

## 21 Data availability statement

22 The legal restriction on data availability is set by the Tromsø Study Data and Publication Committee in  
23 order to control for data sharing, including publication of datasets with the potential of reverse identification  
24 of de-identified sensitive participant information. The data can be made available from the Tromsø Study  
25 upon application to the Tromsø Study Data and Publication Committee. Contact information: The Tromsø  
26 Study, Department of Community Medicine, Faculty of Health Sciences, UiT The Arctic University of  
27 Norway; e-mail: [tromsous@uit.no](mailto:tromsous@uit.no) <<mailto:tromsous@uit.no>>.

## 28 Patient consent for publication

29 Not required



## 1 References

- 2 1 Kojima G, Iliffe S, Jivraj S, et al. Association between frailty and quality of life among  
3 community-dwelling older people: a systematic review and meta-analysis. *J Epidemiol Community*  
4 *Health* 2016;70:716–21. doi:10.1136/jech-2015-206717
- 5 2 Conroy S, Elliott A. The frailty syndrome. *Med (United Kingdom)* 2017;45:15–8.  
6 doi:10.1016/j.mpmed.2016.10.010
- 7 3 Sezgin D, O'Donovan M, Woo J, et al. Early identification of frailty: Developing an international  
8 delphi consensus on pre-frailty. *Arch Gerontol Geriatr* 2022;99:104586.  
9 doi:10.1016/j.archger.2021.104586
- 10 4 Sezgin D, Liew A, O'Donovan MR, et al. Pre-frailty as a multi-dimensional construct: A  
11 systematic review of definitions in the scientific literature. *Geriatr Nurs (Minneap)* 2020;41:139–  
12 46. doi:10.1016/j.gerinurse.2019.08.004
- 13 5 Fried LP, Tangen CM, Walston J, et al. Frailty in older adults: evidence for a phenotype. *J*  
14 *Gerontol A Biol Sci Med Sci* 2001;56:M146–56. doi:10.1093/gerona/56.3.m146
- 15 6 O'Caomh R, Sezgin D, O'Donovan MR, et al. Prevalence of frailty in 62 countries across the  
16 world: a systematic review and meta-analysis of population-level studies. *Age Ageing* 2021;50:96–  
17 104. doi:10.1093/ageing/afaa219
- 18 7 United Nations Department of Economic and Social Affairs. World Population Ageing 2019. 2020.
- 19 8 Reinders I, Visser M, Schaap L. Body weight and body composition in old age and their  
20 relationship with frailty. *Curr Opin Clin Nutr Metab Care* 2017;20:11–5.  
21 doi:10.1097/MCO.0000000000000332
- 22 9 Xu L, Zhang J, Shen S, et al. Association Between Body Composition and Frailty in Elder  
23 Inpatients. *Clin Interv Aging* 2020;Volume 15:313–20. doi:10.2147/CIA.S243211
- 24 10 Villareal DT, Apovian CM, Kushner RF, et al. Obesity in Older Adults: Technical Review and  
25 Position Statement of the American Society for Nutrition and NAASO, The Obesity Society. *Obes*  
26 *Res* 2005;13:1849–63. doi:10.1038/oby.2005.228
- 27 11 Bowen ME. The Relationship Between Body Weight, Frailty, and the Disablement Process.

- 1  
2  
3 1 *Journals Gerontol Ser B Psychol Sci Soc Sci* 2012;67:618–26. doi:10.1093/geronb/gbs067  
4  
5  
6 2 12 Blaum CS, Xue QL, Michelon E, et al. The Association Between Obesity and the Frailty  
7 3 Syndrome in Older Women: The Women’s Health and Aging Studies. *J Am Geriatr Soc*  
8 4 2005;53:927–34. doi:10.1111/j.1532-5415.2005.53300.x  
9  
10  
11 5 13 Rietman ML, van der a DL, van Oostrom SH, et al. The Association Between BMI and Different  
12 6 Frailty Domains: A U-Shaped Curve? *J Nutr Heal Aging* 2018;22:8–15. doi:10.1007/s12603-016-  
13 7 0854-3  
14  
15  
16  
17 8 14 Porter Starr KN, McDonald SR, Bales CW. Obesity and physical frailty in older adults: A scoping  
18 9 review of lifestyle intervention trials. *J Am Med Dir Assoc* 2014;15:240–50.  
19 10 doi:10.1016/j.jamda.2013.11.008  
20  
21  
22  
23 11 15 Hubbard RE, Lang IA, Llewellyn DJ, et al. Frailty, Body Mass Index, and Abdominal Obesity in  
24 12 Older People. *Journals Gerontol Ser A Biol Sci Med Sci* 2010;65A:377–81.  
25 13 doi:10.1093/gerona/glp186  
26  
27  
28  
29 14 16 Crow RS, Lohman MC, Titus AJ, et al. Association of Obesity and Frailty in Older Adults:  
30 15 NHANES 1999–2004. *J Nutr Health Aging* 2019;23:138–44. doi:10.1007/s12603-018-1138-x  
31  
32  
33 16 17 Himes CL. Obesity, disease, and functional limitation in later life. *Demography* 2000;37:73–82.  
34 17 doi:10.2307/2648097  
35  
36  
37 18 18 Bales CW, Buhr G. Is obesity bad for older persons? A systematic review of the pros and cons of  
38 19 weight reduction in later life. *J Am Med Dir Assoc* 2008;9:302–12.  
39 20 doi:10.1016/j.jamda.2008.01.006  
40  
41  
42  
43 21 19 Jarosz PA, Bellar A. Sarcopenic obesity: an emerging cause of frailty in older adults. *Geriatr Nurs*  
44 22 2009;30:64–70. doi:10.1016/j.gerinurse.2008.02.010  
45  
46  
47 23 20 Zupo R, Castellana F, Bortone I, et al. Nutritional domains in frailty tools: Working towards an  
48 24 operational definition of nutritional frailty. *Ageing Res Rev* 2020;64:101148.  
49 25 doi:10.1016/j.arr.2020.101148  
50  
51  
52  
53 26 21 Liu X, Huang Y, Lo K, et al. Quotient of Waist Circumference and Body Mass Index: A Valuable  
54 27 Indicator for the High-Risk Phenotype of Obesity. *Front Endocrinol (Lausanne)* 2021;12:1–10.  
55 28 doi:10.3389/fendo.2021.697437  
56  
57  
58  
59  
60



- 1  
2  
3 1 22 Cornier MA, Després JP, Davis N, et al. Assessing adiposity: A scientific statement from the  
4 American heart association. *Circulation* 2011;124:1996–2019.  
5 2  
6 3 doi:10.1161/CIR.0b013e318233bc6a  
7  
8  
9 4 23 Lundblad MW, Jacobsen BK, Johansson J, et al. Anthropometric measures are satisfactory  
10 substitutes for the DXA-derived visceral adipose tissue in the association with cardiometabolic  
11 risk-The Tromsø Study 2015-2016. doi:10.1002/osp4.517  
12 6  
13  
14 7 24 Woods NF, LaCroix AZ, Gray SL, et al. Frailty: emergence and consequences in women aged 65  
15 and older in the Women’s Health Initiative Observational Study. *J Am Geriatr Soc* 2005;53:1321–  
16 8  
17 30. doi:10.1111/j.1532-5415.2005.53405.x  
18 9  
19  
20 10 25 Stenholm S, Strandberg TE, Pitkälä K, et al. Midlife obesity and risk of frailty in old age during a  
21 22-year follow-up in men and women: The mini-Finland follow-up survey. *Journals Gerontol - Ser*  
22 11  
23 *A Biol Sci Med Sci* 2014;69:73–8. doi:10.1093/gerona/glt052  
24 12  
25  
26 13 26 Strandberg TE, Sirola J, Pitkälä KH, et al. Association of midlife obesity and cardiovascular risk  
27 with old age frailty: A 26-year follow-up of initially healthy men. *Int J Obes* 2012;36:1153–7.  
28 14  
29 15 doi:10.1038/ijo.2012.83  
30  
31  
32 16 27 Liao Q, Zheng Z, Xiu S, et al. Waist circumference is a better predictor of risk for frailty than BMI  
33 17 in the community-dwelling elderly in Beijing. *Aging Clin Exp Res* 2018;30:1319–25.  
34 18  
35 18 doi:10.1007/s40520-018-0933-x  
36  
37  
38 19 28 Falsarella G, Gasparotto LPR, Barcelos CC, et al. Body composition as a frailty marker for the  
39 20 elderly community. *Clin Interv Aging* 2015;10:1661. doi:10.2147/CIA.S84632  
40  
41  
42 21 29 García-Esquinas E, José García-García F, León-Muñoz LM, et al. Obesity, fat distribution, and risk  
43 22 of frailty in two population-based cohorts of older adults in Spain. *Obesity* 2015;23:847–55.  
44 23  
45 23 doi:10.1002/oby.21013  
46  
47  
48 24 30 Malenfant JH, Batsis JA. Obesity in the geriatric population – a global health perspective. *J Glob*  
49 25  
50 *Heal Reports* 2019;3. doi:10.29392/joghr.3.e2019045  
51  
52 26 31 Mezuk B, Lohman MC, Rock AK, et al. Trajectories of body mass indices and development of  
53 27 frailty: Evidence from the health and retirement study. *Obesity* 2016;24:1643–7.  
54 28  
55 28 doi:10.1002/oby.21572  
56  
57  
58  
59  
60

- 1  
2  
3 1 32 Landré B, Czernichow S, Goldberg M, et al. Association Between Life-Course Obesity and Frailty  
4 in Older Adults: Findings in the GAZEL Cohort. *Obesity (Silver Spring)* 2020;28:388–96.  
5 2  
6 3 doi:10.1002/oby.22682  
7  
8  
9 4 33 UiT. The Arctic University of Norway. The Tromsø Study | UiT.  
10 https://uit.no/research/tromsostudy (accessed 29 Jan 2022).  
11 5  
12  
13 6 34 World Health Organisation (WHO). Obesity : preventing and managing the global epidemic :  
14 report of a WHO consultation (WHO technical report series ; 894). 2000.  
15 7  
16 8 https://apps.who.int/iris/handle/10665/42330  
17  
18  
19 9 35 World Health Organisation (WHO). Waist Circumference and Waist–Hip Ratio. Report of a WHO  
20 Expert Consultation. Geneva, 8-11 December 2008. Geneva: 2008.  
21 10  
22 11 http://apps.who.int/iris/bitstream/handle/10665/44583/9789241501491\_eng.pdf?sequence=1  
23  
24  
25 12 36 Elia M. The ‘MUST’ report. Nutritional screening of adults: a multidisciplinary responsibility.  
26 13 Development and use of the ‘Malnutrition Universal Screening Tool’ (MUST) for adults. BAPEN  
27 14 2003.  
28  
29  
30 15 37 Derogatis LR, Lipman RS, Rickels K, et al. The Hopkins Symptom Checklist (HSCL): a self-  
31 report symptom inventory. *Behav Sci* 1974;19:1–15. doi:10.1002/bs.3830190102  
32 16  
33  
34 17 38 Bergland A, Strand BH. Norwegian reference values for the Short Physical Performance Battery  
35 (SPPB): the Tromsø Study. *BMC Geriatr* 2019;19:216. doi:10.1186/s12877-019-1234-8  
36 18  
37  
38 19 39 Freiburger E, de Vreede P, Schoene D, et al. Performance-based physical function in older  
39 community-dwelling persons: a systematic review of instruments. *Age Ageing* 2012;41:712–21.  
40 20  
41 21 doi:10.1093/ageing/afs099  
42  
43  
44 22 40 Roberts HC, Denison HJ, Martin HJ, et al. A review of the measurement of grip strength in clinical  
45 and epidemiological studies: Towards a standardised approach. *Age Ageing* 2011;40:423–9.  
46 23  
47 24 doi:10.1093/ageing/afr051  
48  
49  
50 25 41 Grimby G, Börjesson M, Jonsdottir IH, et al. The ‘Saltin-Grimby Physical Activity Level Scale’  
51 and its application to health research. *Scand J Med Sci Sports* 2015;25 Suppl 4:119–25.  
52 26  
53 27 doi:10.1111/sms.12611  
54  
55  
56 28 42 Charlson ME, Pompei P, Ales KL, et al. A new method of classifying prognostic comorbidity in

- 1  
2  
3 1 longitudinal studies: development and validation. *J Chronic Dis* 1987;40:373–83.  
4 2 doi:10.1016/0021-9681(87)90171-8  
5  
6  
7 3 43 De Rubeis V, Andreacchi AT, Sharpe I, et al. Group-based trajectory modeling of body mass index  
8 4 and body size over the life course: A scoping review. *Obes Sci Pract* 2021;7:100–28.  
9 5 doi:10.1002/osp4.456  
10  
11  
12  
13 6 44 Jones BL, Nagin DS. A Note on a Stata Plugin for Estimating Group-based Trajectory Models.  
14 7 *Sociol Methods Res* 2013;42:608–13. doi:10.1177/0049124113503141  
15  
16  
17 8 45 StataCorp. Stata Statistical Software: Release 16. College Station, TX: Stata Corp LLC, 2019.  
18  
19  
20 9 46 Afonso C, Sousa-Santos AR, Santos A, et al. Frailty status is related to general and abdominal  
21 10 obesity in older adults. *Nutr Res* 2021;85:21–30. doi:10.1016/j.nutres.2020.10.009  
22  
23  
24 11 47 Soysal P, Stubbs B, Lucato P, et al. Inflammation and frailty in the elderly: A systematic review  
25 12 and meta-analysis. *Ageing Res Rev* 2016;31:1–8. doi:10.1016/J.ARR.2016.08.006  
26  
27  
28 13 48 Goodpaster BH, Theriault R, Watkins SC, et al. Intramuscular lipid content is increased in obesity  
29 14 and decreased by weight loss. *Metabolism* 2000;49:467–72. doi:10.1016/s0026-0495(00)80010-4  
30  
31  
32 15 49 Villareal DT, Banks M, Siener C, et al. Physical frailty and body composition in obese elderly men  
33 16 and women. *Obes Res* 2004;12:913–20. doi:10.1038/oby.2004.111  
34  
35  
36 17 50 Baumgartner RN, Wayne SJ, Waters DL, et al. Sarcopenic obesity predicts instrumental activities  
37 18 of daily living disability in the elderly. *Obes Res* 2004;12:1995–2004. doi:10.1038/oby.2004.250  
38  
39  
40 19 51 Grundy SM, Neeland IJ, Turer AT, et al. Clinical Study Waist Circumference as Measure of  
41 20 Abdominal Fat Compartments. *J Obes* 2013;2013. doi:10.1155/2013/454285  
42  
43  
44 21 52 Buta BJ, Walston JD, Godino JG, et al. Frailty assessment instruments: Systematic characterisation  
45 22 of the uses and contexts of highly-cited instruments. *Ageing Res Rev* 2016;26:53–61.  
46 23 doi:10.1016/j.arr.2015.12.003  
47  
48  
49  
50 24 53 Panza F, Lozupone M, Solfrizzi V, et al. Different Cognitive Frailty Models and Health- and  
51 25 Cognitive-related Outcomes in Older Age: From Epidemiology to Prevention. *J Alzheimer's Dis*  
52 26 2018;62:993–1012. doi:10.3233/JAD-170963  
53  
54  
55  
56 27 54 Theou O, Cann L, Blodgett J, et al. Modifications to the frailty phenotype criteria: Systematic  
57  
58  
59  
60

- 1  
2  
3 1 review of the current literature and investigation of 262 frailty phenotypes in the Survey of Health,  
4 2 Ageing, and Retirement in Europe. *Ageing Res Rev* 2015;21:78–94. doi:10.1016/j.arr.2015.04.001  
5  
6  
7 3 55 Kim S, Kim M, Jung H-W, *et al.* Development of a Frailty Phenotype Questionnaire for Use in  
8 4 Screening Community-Dwelling Older Adults. *J Am Med Dir Assoc* 2020;21:660–4.  
9 5 doi:10.1016/j.jamda.2019.08.028  
10  
11  
12  
13 6 56 Van der Elst MCJ, Schoenmakers B, Op het Veld LPM, *et al.* Validation of replacement questions  
14 7 for slowness and weakness to assess the Fried Phenotype: a cross-sectional study. *Eur Geriatr Med*  
15 8 2020;11:793–801. doi:10.1007/s41999-020-00337-8  
16  
17  
18  
19 9 57 Cooper R, Shkolnikov VM, Kudryavtsev A V., *et al.* Between-study differences in grip strength: a  
20 10 comparison of Norwegian and Russian adults aged 40–69 years. *J Cachexia Sarcopenia Muscle*  
21 11 2021;12:2091–100. doi:10.1002/jcsm.12816  
22  
23  
24 12 58 OECD, European Observatory on Health Systems and Policies (2021). Norway: Country Health  
25 13 Profile 2021, State of Health in the EU. OECD Publishing 2021. doi:10.1787/6871e6c4-en  
26  
27  
28  
29 14 59 Gordon SJ, Baker N, Kidd M, *et al.* Pre-frailty factors in community-dwelling 40-75 year olds:  
30 15 opportunities for successful ageing. *BMC Geriatr* 2020;20:96. doi:10.1186/s12877-020-1490-7  
31  
32  
33 16  
34  
35 17  
36  
37  
38 18  
39  
40  
41 19  
42  
43 20  
44  
45  
46 21  
47  
48 22  
49  
50  
51 23  
52  
53  
54 24  
55  
56 25  
57  
58  
59  
60

1  
2  
3 **1 List of Figures**  
4

5  
6 2 Figure 1 Flowchart displaying participants' inclusion and exclusion

7  
8 3 Supplementary Figure 1 Trajectories of individuals with repeated body mass index measurements between  
9 4 Tromsø4 and Tromsø7: The Tromsø Study 1994–2016

10  
11 5 Supplementary Figure 2 Trajectories of individuals with repeated waist circumference measurements  
12 6 between Tromsø4 and Tromsø7: The Tromsø Study 1994–2016  
13  
14  
15  
16  
17  
18  
19  
20  
21  
22  
23  
24  
25  
26  
27  
28  
29  
30  
31  
32  
33  
34  
35  
36  
37  
38  
39  
40  
41  
42  
43  
44  
45  
46  
47  
48  
49  
50  
51  
52  
53  
54  
55  
56  
57  
58  
59  
60

For peer review only



Figure 1 Flowchart displaying participants' inclusion and exclusion

1  
2  
3  
4  
5  
6  
7  
8  
9  
10  
11  
12  
13  
14  
15  
16  
17  
18  
19  
20  
21  
22  
23  
24  
25  
26  
27  
28  
29  
30  
31  
32  
33  
34  
35  
36  
37  
38  
39  
40  
41  
42  
43  
44  
45  
46  
47  
48  
49  
50  
51  
52  
53  
54  
55  
56  
57  
58  
59  
60

## SUPPLEMENTARY TABLES

For peer review only

Supplementary Table 1 Comparison between Fried et al.'s suggested criteria for frailty and modified frailty indicators used in this study

| Frailty                  | Fried et al. (2001)                                                                                                                                                                                                                                                                                                                                                                                                                                                                                                                                                                                                                                                                                                                                                                                                                                                                                                     | Current study                                                                                                                                                                                                                                                                                                                                                                                                                                                                                                                                                                                 |                                                      |         |        |             |        |             |        |         |        |       |                                                      |         |        |             |          |             |        |         |        |                                                                                                                                                                                                                                                                                                                                                                                                                                                                                                                                                                                                                                                                                                                                                                                                                                                                           |     |                                                      |         |        |             |        |             |        |         |        |       |                                                      |         |        |             |          |             |        |         |        |
|--------------------------|-------------------------------------------------------------------------------------------------------------------------------------------------------------------------------------------------------------------------------------------------------------------------------------------------------------------------------------------------------------------------------------------------------------------------------------------------------------------------------------------------------------------------------------------------------------------------------------------------------------------------------------------------------------------------------------------------------------------------------------------------------------------------------------------------------------------------------------------------------------------------------------------------------------------------|-----------------------------------------------------------------------------------------------------------------------------------------------------------------------------------------------------------------------------------------------------------------------------------------------------------------------------------------------------------------------------------------------------------------------------------------------------------------------------------------------------------------------------------------------------------------------------------------------|------------------------------------------------------|---------|--------|-------------|--------|-------------|--------|---------|--------|-------|------------------------------------------------------|---------|--------|-------------|----------|-------------|--------|---------|--------|---------------------------------------------------------------------------------------------------------------------------------------------------------------------------------------------------------------------------------------------------------------------------------------------------------------------------------------------------------------------------------------------------------------------------------------------------------------------------------------------------------------------------------------------------------------------------------------------------------------------------------------------------------------------------------------------------------------------------------------------------------------------------------------------------------------------------------------------------------------------------|-----|------------------------------------------------------|---------|--------|-------------|--------|-------------|--------|---------|--------|-------|------------------------------------------------------|---------|--------|-------------|----------|-------------|--------|---------|--------|
| <b>Exhaustion</b>        | <p>Questions from the Center for Epidemiologic Studies Depression Scale:</p> <p>(a) I felt that everything I did was an effort</p> <p>(b) I could not get going</p> <p>How often in the last week did you feel this way?</p> <p>0 = Rarely or none of the time (&lt;1 day)</p> <p>1 = Some or a little of the time (1–2 days)</p> <p>2 = A moderate amount of time (3–4 days)</p> <p>3 = Most of the time</p> <p><b>Exhausted: “A moderate amount of time (3–4 days)” or “Most of the time”</b></p>                                                                                                                                                                                                                                                                                                                                                                                                                     | <p>Hopkins Symptom Checklist (HSCL-10):</p> <p>During the last week, have you experienced that everything is a struggle?</p> <p>1 = No complaint</p> <p>2 = Little complaint</p> <p>3 = Pretty much</p> <p>4 = Very much</p> <p><b>Exhausted: “Pretty much” or “Very much”</b></p>                                                                                                                                                                                                                                                                                                            |                                                      |         |        |             |        |             |        |         |        |       |                                                      |         |        |             |          |             |        |         |        |                                                                                                                                                                                                                                                                                                                                                                                                                                                                                                                                                                                                                                                                                                                                                                                                                                                                           |     |                                                      |         |        |             |        |             |        |         |        |       |                                                      |         |        |             |          |             |        |         |        |
| <b>Physical activity</b> | <p>Minnesota Leisure Time Activity Questionnaire asking about walking, chores (moderately strenuous), mowing the lawn, raking, gardening, hiking, jogging, biking, exercise, cycling, dancing, aerobics, bowling, golf, singles, tennis, racquetball, calisthenics, swimming.</p> <p>The kcal/week expended was calculated using a standardized algorithm. Lowest 20% were identified, resulting in following cut-off for frailty:</p> <p>Men: &lt;383 kcal of physical activity/week</p> <p>Women: &lt;270 kcal of physical activity/week</p>                                                                                                                                                                                                                                                                                                                                                                          | <p>Describe your exercise and physical exertion in leisure time over the last year (Saltin &amp; Grimby's Scale).</p> <p>1 = Reading, watching TV/screen or other sedentary activity</p> <p>2 = Walking, cycling, or other forms of exercise at least 4 hours a week</p> <p>3 = Participation in recreational sports, heavy gardening, snow shoveling, etc. at least 4 hours a week</p> <p>4 = Participation in hard training or sports competitions, regularly several times a week</p> <p><b>Low physical activity level: “Reading, watching TV/screen or other sedentary activity”</b></p> |                                                      |         |        |             |        |             |        |         |        |       |                                                      |         |        |             |          |             |        |         |        |                                                                                                                                                                                                                                                                                                                                                                                                                                                                                                                                                                                                                                                                                                                                                                                                                                                                           |     |                                                      |         |        |             |        |             |        |         |        |       |                                                      |         |        |             |          |             |        |         |        |
| <b>Weight loss</b>       | <p>In the last year, have you lost more than 10 pounds (4.5 kg) unintentionally (not due to dieting or exercise)?</p> <p><b>Frail: “Yes”</b></p>                                                                                                                                                                                                                                                                                                                                                                                                                                                                                                                                                                                                                                                                                                                                                                        | <p>Have you involuntarily lost weight during the last 6 months? (Malnutrition Universal Screening Tool)</p> <p>0 = No</p> <p>1 = Yes</p> <p><b>Lost weight: “Yes”</b></p>                                                                                                                                                                                                                                                                                                                                                                                                                     |                                                      |         |        |             |        |             |        |         |        |       |                                                      |         |        |             |          |             |        |         |        |                                                                                                                                                                                                                                                                                                                                                                                                                                                                                                                                                                                                                                                                                                                                                                                                                                                                           |     |                                                      |         |        |             |        |             |        |         |        |       |                                                      |         |        |             |          |             |        |         |        |
| <b>Grip strength</b>     | <p>Measured by Jamar dynamometer (kg)</p> <p>Maximal strength in dominant hand (3 trials)</p> <p>Stratified by sex and BMI quartiles. Lowest 20% were identified, resulting in the following cut-off for frailty:</p> <table border="0"> <thead> <tr> <th>Men</th> <th>Cut-off for grip strength (kg) criterion for frailty</th> </tr> </thead> <tbody> <tr> <td>BMI ≤24</td> <td>≤29 kg</td> </tr> <tr> <td>BMI 24.1–26</td> <td>≤30 kg</td> </tr> <tr> <td>BMI 26.1–28</td> <td>≤30 kg</td> </tr> <tr> <td>BMI &gt;28</td> <td>≤32 kg</td> </tr> </tbody> </table> <table border="0"> <thead> <tr> <th>Women</th> <th>Cut-off for grip strength (kg) criterion for frailty</th> </tr> </thead> <tbody> <tr> <td>BMI ≤23</td> <td>≤17 kg</td> </tr> <tr> <td>BMI 23.1–26</td> <td>≤17.3 kg</td> </tr> <tr> <td>BMI 26.1–29</td> <td>≤18 kg</td> </tr> <tr> <td>BMI &gt;29</td> <td>≤21 kg</td> </tr> </tbody> </table> | Men                                                                                                                                                                                                                                                                                                                                                                                                                                                                                                                                                                                           | Cut-off for grip strength (kg) criterion for frailty | BMI ≤24 | ≤29 kg | BMI 24.1–26 | ≤30 kg | BMI 26.1–28 | ≤30 kg | BMI >28 | ≤32 kg | Women | Cut-off for grip strength (kg) criterion for frailty | BMI ≤23 | ≤17 kg | BMI 23.1–26 | ≤17.3 kg | BMI 26.1–29 | ≤18 kg | BMI >29 | ≤21 kg | <p>Measured by Jamar dynamometer (kg)</p> <p>Strongest measurement from 3 trials in each hand</p> <p>Stratified by sex and BMI quartiles as per Fried's definition:</p> <table border="0"> <thead> <tr> <th>Men</th> <th>Cut-off for grip strength (kg) criterion for frailty</th> </tr> </thead> <tbody> <tr> <td>BMI ≤24</td> <td>≤29 kg</td> </tr> <tr> <td>BMI 24.1–26</td> <td>≤30 kg</td> </tr> <tr> <td>BMI 26.1–28</td> <td>≤30 kg</td> </tr> <tr> <td>BMI &gt;28</td> <td>≤32 kg</td> </tr> </tbody> </table> <table border="0"> <thead> <tr> <th>Women</th> <th>Cut-off for grip strength (kg) criterion for frailty</th> </tr> </thead> <tbody> <tr> <td>BMI ≤23</td> <td>≤17 kg</td> </tr> <tr> <td>BMI 23.1–26</td> <td>≤17.3 kg</td> </tr> <tr> <td>BMI 26.1–29</td> <td>≤18 kg</td> </tr> <tr> <td>BMI &gt;29</td> <td>≤21 kg</td> </tr> </tbody> </table> | Men | Cut-off for grip strength (kg) criterion for frailty | BMI ≤24 | ≤29 kg | BMI 24.1–26 | ≤30 kg | BMI 26.1–28 | ≤30 kg | BMI >28 | ≤32 kg | Women | Cut-off for grip strength (kg) criterion for frailty | BMI ≤23 | ≤17 kg | BMI 23.1–26 | ≤17.3 kg | BMI 26.1–29 | ≤18 kg | BMI >29 | ≤21 kg |
| Men                      | Cut-off for grip strength (kg) criterion for frailty                                                                                                                                                                                                                                                                                                                                                                                                                                                                                                                                                                                                                                                                                                                                                                                                                                                                    |                                                                                                                                                                                                                                                                                                                                                                                                                                                                                                                                                                                               |                                                      |         |        |             |        |             |        |         |        |       |                                                      |         |        |             |          |             |        |         |        |                                                                                                                                                                                                                                                                                                                                                                                                                                                                                                                                                                                                                                                                                                                                                                                                                                                                           |     |                                                      |         |        |             |        |             |        |         |        |       |                                                      |         |        |             |          |             |        |         |        |
| BMI ≤24                  | ≤29 kg                                                                                                                                                                                                                                                                                                                                                                                                                                                                                                                                                                                                                                                                                                                                                                                                                                                                                                                  |                                                                                                                                                                                                                                                                                                                                                                                                                                                                                                                                                                                               |                                                      |         |        |             |        |             |        |         |        |       |                                                      |         |        |             |          |             |        |         |        |                                                                                                                                                                                                                                                                                                                                                                                                                                                                                                                                                                                                                                                                                                                                                                                                                                                                           |     |                                                      |         |        |             |        |             |        |         |        |       |                                                      |         |        |             |          |             |        |         |        |
| BMI 24.1–26              | ≤30 kg                                                                                                                                                                                                                                                                                                                                                                                                                                                                                                                                                                                                                                                                                                                                                                                                                                                                                                                  |                                                                                                                                                                                                                                                                                                                                                                                                                                                                                                                                                                                               |                                                      |         |        |             |        |             |        |         |        |       |                                                      |         |        |             |          |             |        |         |        |                                                                                                                                                                                                                                                                                                                                                                                                                                                                                                                                                                                                                                                                                                                                                                                                                                                                           |     |                                                      |         |        |             |        |             |        |         |        |       |                                                      |         |        |             |          |             |        |         |        |
| BMI 26.1–28              | ≤30 kg                                                                                                                                                                                                                                                                                                                                                                                                                                                                                                                                                                                                                                                                                                                                                                                                                                                                                                                  |                                                                                                                                                                                                                                                                                                                                                                                                                                                                                                                                                                                               |                                                      |         |        |             |        |             |        |         |        |       |                                                      |         |        |             |          |             |        |         |        |                                                                                                                                                                                                                                                                                                                                                                                                                                                                                                                                                                                                                                                                                                                                                                                                                                                                           |     |                                                      |         |        |             |        |             |        |         |        |       |                                                      |         |        |             |          |             |        |         |        |
| BMI >28                  | ≤32 kg                                                                                                                                                                                                                                                                                                                                                                                                                                                                                                                                                                                                                                                                                                                                                                                                                                                                                                                  |                                                                                                                                                                                                                                                                                                                                                                                                                                                                                                                                                                                               |                                                      |         |        |             |        |             |        |         |        |       |                                                      |         |        |             |          |             |        |         |        |                                                                                                                                                                                                                                                                                                                                                                                                                                                                                                                                                                                                                                                                                                                                                                                                                                                                           |     |                                                      |         |        |             |        |             |        |         |        |       |                                                      |         |        |             |          |             |        |         |        |
| Women                    | Cut-off for grip strength (kg) criterion for frailty                                                                                                                                                                                                                                                                                                                                                                                                                                                                                                                                                                                                                                                                                                                                                                                                                                                                    |                                                                                                                                                                                                                                                                                                                                                                                                                                                                                                                                                                                               |                                                      |         |        |             |        |             |        |         |        |       |                                                      |         |        |             |          |             |        |         |        |                                                                                                                                                                                                                                                                                                                                                                                                                                                                                                                                                                                                                                                                                                                                                                                                                                                                           |     |                                                      |         |        |             |        |             |        |         |        |       |                                                      |         |        |             |          |             |        |         |        |
| BMI ≤23                  | ≤17 kg                                                                                                                                                                                                                                                                                                                                                                                                                                                                                                                                                                                                                                                                                                                                                                                                                                                                                                                  |                                                                                                                                                                                                                                                                                                                                                                                                                                                                                                                                                                                               |                                                      |         |        |             |        |             |        |         |        |       |                                                      |         |        |             |          |             |        |         |        |                                                                                                                                                                                                                                                                                                                                                                                                                                                                                                                                                                                                                                                                                                                                                                                                                                                                           |     |                                                      |         |        |             |        |             |        |         |        |       |                                                      |         |        |             |          |             |        |         |        |
| BMI 23.1–26              | ≤17.3 kg                                                                                                                                                                                                                                                                                                                                                                                                                                                                                                                                                                                                                                                                                                                                                                                                                                                                                                                |                                                                                                                                                                                                                                                                                                                                                                                                                                                                                                                                                                                               |                                                      |         |        |             |        |             |        |         |        |       |                                                      |         |        |             |          |             |        |         |        |                                                                                                                                                                                                                                                                                                                                                                                                                                                                                                                                                                                                                                                                                                                                                                                                                                                                           |     |                                                      |         |        |             |        |             |        |         |        |       |                                                      |         |        |             |          |             |        |         |        |
| BMI 26.1–29              | ≤18 kg                                                                                                                                                                                                                                                                                                                                                                                                                                                                                                                                                                                                                                                                                                                                                                                                                                                                                                                  |                                                                                                                                                                                                                                                                                                                                                                                                                                                                                                                                                                                               |                                                      |         |        |             |        |             |        |         |        |       |                                                      |         |        |             |          |             |        |         |        |                                                                                                                                                                                                                                                                                                                                                                                                                                                                                                                                                                                                                                                                                                                                                                                                                                                                           |     |                                                      |         |        |             |        |             |        |         |        |       |                                                      |         |        |             |          |             |        |         |        |
| BMI >29                  | ≤21 kg                                                                                                                                                                                                                                                                                                                                                                                                                                                                                                                                                                                                                                                                                                                                                                                                                                                                                                                  |                                                                                                                                                                                                                                                                                                                                                                                                                                                                                                                                                                                               |                                                      |         |        |             |        |             |        |         |        |       |                                                      |         |        |             |          |             |        |         |        |                                                                                                                                                                                                                                                                                                                                                                                                                                                                                                                                                                                                                                                                                                                                                                                                                                                                           |     |                                                      |         |        |             |        |             |        |         |        |       |                                                      |         |        |             |          |             |        |         |        |
| Men                      | Cut-off for grip strength (kg) criterion for frailty                                                                                                                                                                                                                                                                                                                                                                                                                                                                                                                                                                                                                                                                                                                                                                                                                                                                    |                                                                                                                                                                                                                                                                                                                                                                                                                                                                                                                                                                                               |                                                      |         |        |             |        |             |        |         |        |       |                                                      |         |        |             |          |             |        |         |        |                                                                                                                                                                                                                                                                                                                                                                                                                                                                                                                                                                                                                                                                                                                                                                                                                                                                           |     |                                                      |         |        |             |        |             |        |         |        |       |                                                      |         |        |             |          |             |        |         |        |
| BMI ≤24                  | ≤29 kg                                                                                                                                                                                                                                                                                                                                                                                                                                                                                                                                                                                                                                                                                                                                                                                                                                                                                                                  |                                                                                                                                                                                                                                                                                                                                                                                                                                                                                                                                                                                               |                                                      |         |        |             |        |             |        |         |        |       |                                                      |         |        |             |          |             |        |         |        |                                                                                                                                                                                                                                                                                                                                                                                                                                                                                                                                                                                                                                                                                                                                                                                                                                                                           |     |                                                      |         |        |             |        |             |        |         |        |       |                                                      |         |        |             |          |             |        |         |        |
| BMI 24.1–26              | ≤30 kg                                                                                                                                                                                                                                                                                                                                                                                                                                                                                                                                                                                                                                                                                                                                                                                                                                                                                                                  |                                                                                                                                                                                                                                                                                                                                                                                                                                                                                                                                                                                               |                                                      |         |        |             |        |             |        |         |        |       |                                                      |         |        |             |          |             |        |         |        |                                                                                                                                                                                                                                                                                                                                                                                                                                                                                                                                                                                                                                                                                                                                                                                                                                                                           |     |                                                      |         |        |             |        |             |        |         |        |       |                                                      |         |        |             |          |             |        |         |        |
| BMI 26.1–28              | ≤30 kg                                                                                                                                                                                                                                                                                                                                                                                                                                                                                                                                                                                                                                                                                                                                                                                                                                                                                                                  |                                                                                                                                                                                                                                                                                                                                                                                                                                                                                                                                                                                               |                                                      |         |        |             |        |             |        |         |        |       |                                                      |         |        |             |          |             |        |         |        |                                                                                                                                                                                                                                                                                                                                                                                                                                                                                                                                                                                                                                                                                                                                                                                                                                                                           |     |                                                      |         |        |             |        |             |        |         |        |       |                                                      |         |        |             |          |             |        |         |        |
| BMI >28                  | ≤32 kg                                                                                                                                                                                                                                                                                                                                                                                                                                                                                                                                                                                                                                                                                                                                                                                                                                                                                                                  |                                                                                                                                                                                                                                                                                                                                                                                                                                                                                                                                                                                               |                                                      |         |        |             |        |             |        |         |        |       |                                                      |         |        |             |          |             |        |         |        |                                                                                                                                                                                                                                                                                                                                                                                                                                                                                                                                                                                                                                                                                                                                                                                                                                                                           |     |                                                      |         |        |             |        |             |        |         |        |       |                                                      |         |        |             |          |             |        |         |        |
| Women                    | Cut-off for grip strength (kg) criterion for frailty                                                                                                                                                                                                                                                                                                                                                                                                                                                                                                                                                                                                                                                                                                                                                                                                                                                                    |                                                                                                                                                                                                                                                                                                                                                                                                                                                                                                                                                                                               |                                                      |         |        |             |        |             |        |         |        |       |                                                      |         |        |             |          |             |        |         |        |                                                                                                                                                                                                                                                                                                                                                                                                                                                                                                                                                                                                                                                                                                                                                                                                                                                                           |     |                                                      |         |        |             |        |             |        |         |        |       |                                                      |         |        |             |          |             |        |         |        |
| BMI ≤23                  | ≤17 kg                                                                                                                                                                                                                                                                                                                                                                                                                                                                                                                                                                                                                                                                                                                                                                                                                                                                                                                  |                                                                                                                                                                                                                                                                                                                                                                                                                                                                                                                                                                                               |                                                      |         |        |             |        |             |        |         |        |       |                                                      |         |        |             |          |             |        |         |        |                                                                                                                                                                                                                                                                                                                                                                                                                                                                                                                                                                                                                                                                                                                                                                                                                                                                           |     |                                                      |         |        |             |        |             |        |         |        |       |                                                      |         |        |             |          |             |        |         |        |
| BMI 23.1–26              | ≤17.3 kg                                                                                                                                                                                                                                                                                                                                                                                                                                                                                                                                                                                                                                                                                                                                                                                                                                                                                                                |                                                                                                                                                                                                                                                                                                                                                                                                                                                                                                                                                                                               |                                                      |         |        |             |        |             |        |         |        |       |                                                      |         |        |             |          |             |        |         |        |                                                                                                                                                                                                                                                                                                                                                                                                                                                                                                                                                                                                                                                                                                                                                                                                                                                                           |     |                                                      |         |        |             |        |             |        |         |        |       |                                                      |         |        |             |          |             |        |         |        |
| BMI 26.1–29              | ≤18 kg                                                                                                                                                                                                                                                                                                                                                                                                                                                                                                                                                                                                                                                                                                                                                                                                                                                                                                                  |                                                                                                                                                                                                                                                                                                                                                                                                                                                                                                                                                                                               |                                                      |         |        |             |        |             |        |         |        |       |                                                      |         |        |             |          |             |        |         |        |                                                                                                                                                                                                                                                                                                                                                                                                                                                                                                                                                                                                                                                                                                                                                                                                                                                                           |     |                                                      |         |        |             |        |             |        |         |        |       |                                                      |         |        |             |          |             |        |         |        |
| BMI >29                  | ≤21 kg                                                                                                                                                                                                                                                                                                                                                                                                                                                                                                                                                                                                                                                                                                                                                                                                                                                                                                                  |                                                                                                                                                                                                                                                                                                                                                                                                                                                                                                                                                                                               |                                                      |         |        |             |        |             |        |         |        |       |                                                      |         |        |             |          |             |        |         |        |                                                                                                                                                                                                                                                                                                                                                                                                                                                                                                                                                                                                                                                                                                                                                                                                                                                                           |     |                                                      |         |        |             |        |             |        |         |        |       |                                                      |         |        |             |          |             |        |         |        |



| Frailty               | Fried et al. (2001)                                                                                                                                                                                                                                                                                                                                                                                   | Current study                                                                                                                                                                                                                                                                                                                                                                                                |
|-----------------------|-------------------------------------------------------------------------------------------------------------------------------------------------------------------------------------------------------------------------------------------------------------------------------------------------------------------------------------------------------------------------------------------------------|--------------------------------------------------------------------------------------------------------------------------------------------------------------------------------------------------------------------------------------------------------------------------------------------------------------------------------------------------------------------------------------------------------------|
| <b>Walking speed</b>  | Time to walk (seconds) <u>15 feet at usual pace</u> stratified by sex and height (gender-specific cut-off at medium height): Lowest 20% were identified, resulting in the following cut-off for frailty:<br><b>Men</b> <b>Cut-off for walking speed criterion for frailty</b><br>Height ≤173 cm    ≥7 s<br>Height >173 cm    ≥6 s<br><b>Women</b><br>Height ≤159 cm    ≥7 s<br>Height >159 cm    ≥6 s | SPPB: Short Physical Performance Battery – walking test<br>Fastest of two times (seconds) to walk 4 m stratified by sex and height according to Fried's gender-specific cut-off. Converted to feet from meters.<br><b>Men</b> <b>Cut-off for walking speed criterion for frailty</b><br>Height ≤173 cm    ≥7 s<br>Height >173 cm    ≥6 s<br><b>Women</b><br>Height ≤159 cm    ≥7 s<br>Height >159 cm    ≥6 s |
| <b>Frailty status</b> | Frailty score:<br>0 = Robust<br>1–2 = Pre-frail<br>≥3 = Frail                                                                                                                                                                                                                                                                                                                                         | Frailty score:<br>0 = Robust<br>1–2 = Pre-frail<br>≥3 = Frail<br><br>Pre-frailty/frailty score:<br>0 = Robust<br>≥1 = Pre-frail/frail                                                                                                                                                                                                                                                                        |

Supplementary Table 2 Descriptive characteristics of participants at follow-up: The Tromsø Study 2015-2016

|                                             | Frailty status                    |                                             | P value             |
|---------------------------------------------|-----------------------------------|---------------------------------------------|---------------------|
|                                             | Robust<br>(% (n))<br>70.5 (3,179) | Pre-frail/ frail<br>(% (n))<br>29.5 (1,330) |                     |
| Age in years, mean (SD)                     | 72.1 (5.1)                        | 73.8 (5.9)                                  | <0.001 <sup>a</sup> |
| <b>Women</b>                                | 50.6 (1608)                       | 55.0 (732)                                  | 0.006               |
| <b>Smoking status</b>                       |                                   |                                             |                     |
| Current smokers                             | 8.3 (262)                         | 14.4 (188)                                  |                     |
| Former smokers                              | 53.2 (1,674)                      | 50.8 (666)                                  | <0.001              |
| Never                                       | 38.4 (1,208)                      | 34.8 (456)                                  |                     |
| <b>Married or cohabiting</b>                | 71.0 (2,258)                      | 64.6 (859)                                  | <0.001              |
| <b>Self-perceived health – good</b>         | 69.4 (2,178)                      | 43.2 (566)                                  | <0.001              |
| <b>Social support – enough good friends</b> | 87.4 (2,676)                      | 82.0 (1,047)                                | <0.001              |
| <b>Educational level</b>                    |                                   |                                             |                     |
| Primary/Partly secondary                    | 39.1 (1,201)                      | 50 (632)                                    |                     |
| Upper secondary                             | 26.6 (817)                        | 26.2 (331)                                  | <0.001              |
| College/University short                    | 16.3 (500)                        | 12.2 (154)                                  |                     |
| College/University long                     | 18.1 (556)                        | 11.6 (147)                                  |                     |
| <b>Alcohol intake</b>                       |                                   |                                             |                     |
| Never/Abstaining                            | 11.2 (352)                        | 17.4 (229)                                  |                     |
| Infrequent drinkers                         | 58.6 (1,846)                      | 61.0 (803)                                  | <0.001              |
| Frequent drinkers                           | 30.3 (954)                        | 21.6 (284)                                  |                     |
| <b>Prevalent diseases</b>                   |                                   |                                             |                     |
| Pulmonary disease <sup>b</sup>              | 14.6 (444)                        | 19.9 (250)                                  | <0.001              |
| Coronary heart disease <sup>c</sup>         | 13.7 (415)                        | 19.3 (241)                                  | <0.001              |
| Diabetes                                    | 7.3 (224)                         | 14.8 (186)                                  | <0.001              |
| Cancer                                      | 15.6 (475)                        | 19.3 (243)                                  | 0.003               |
| Stroke                                      | 5.1 (154)                         | 8.1 (101)                                   | <0.001              |
| Peptic ulcer                                | –                                 | –                                           | <0.001              |
| <b>Comorbidity</b>                          | 89.8 (2,800)                      | 82.4 (1,075)                                | <0.001              |
| <b>BMI categories</b>                       |                                   |                                             |                     |
| Underweight                                 | 0.5 (17)                          | 1.4 (18)                                    |                     |
| Normal                                      | 30.0 (951)                        | 24.5 (323)                                  | <0.001              |
| Overweight                                  | 49.4 (1,566)                      | 41.4 (547)                                  |                     |
| Obese                                       | 20.1 (639)                        | 32.7 (432)                                  |                     |
| <b>WC categories</b>                        |                                   |                                             |                     |
| Normal                                      | 22.6 (716)                        | 17.1 (225)                                  |                     |
| Moderately high                             | 28.0 (888)                        | 21.3 (281)                                  | <0.001              |
| High                                        | 49.4 (1,569)                      | 61.6 (812)                                  |                     |

Values are percentage (number); P value:  $\chi^2$  test for categorical variables P value: <sup>a</sup>Student's t-test; <sup>b</sup>including asthma/chronic bronchitis/emphysema; <sup>c</sup>including angina pectoris/myocardial infarction. BMI, body mass index; WC, waist circumference.

**BMI categories**Underweight: <18.5 kg/m<sup>2</sup>Normal: 18.5–24.9 kg/m<sup>2</sup>Overweight: 25.0–29.9 kg/m<sup>2</sup>Obesity: ≥30 kg/m<sup>2</sup>**WC categories**

Normal: men ≤94 cm; women ≤80 cm

Moderately high: men 95–102 cm; women 81–88 cm

High: men &gt;102 cm; women &gt;88 cm

Supplementary Table 3 Descriptive baseline characteristics of Tromsø4 participants who attended Tromsø7 versus those who did not: The Tromsø Study 1994–2016

|                                             | Frailty status                               |                                          | P value             |
|---------------------------------------------|----------------------------------------------|------------------------------------------|---------------------|
|                                             | Not attended Tromsø7<br>n = 8,649<br>(% (n)) | Attended Tromsø7<br>n = 4,809<br>(% (n)) |                     |
| <b>Age in years, mean (SD)</b>              | 63.2 (11.0)                                  | 52.0 (5.8)                               | <0.001 <sup>a</sup> |
| <b>Women</b>                                | 52.4 (4,533)                                 | 52.4 (2520)                              | 0.990               |
| <b>Smoking status</b>                       |                                              |                                          |                     |
| Current smokers                             | 33.7 (2,916)                                 | 29.4 (1,414)                             |                     |
| Former smokers                              | 33.4 (2,886)                                 | 35.6 (1,714)                             | <0.001              |
| Never                                       | 32.9 (2,847)                                 | (34.9) 1,681                             |                     |
| <b>Married or cohabiting</b>                | 64.7 (5,568)                                 | (82.7) 3,977                             | <0.001              |
| <b>Self-perceived health status – good</b>  | 50.7 (4,378)                                 | (70.3) 3,379                             | <0.001              |
| <b>Social support – enough good friends</b> | 83.0 (5,775)                                 | (82.2) 3,590                             | 0.330               |
| <b>Educational level</b>                    |                                              |                                          |                     |
| Primary/Partly secondary                    | 57.2 (4,911)                                 | (36.9) 1,768                             |                     |
| Upper secondary                             | 27.5 (2,362)                                 | (34.1) 1,633                             | <0.001              |
| College/University short                    | 8.1 (696)                                    | (14.9) 716                               |                     |
| College/University long                     | 7.2 (622)                                    | (14.1) 678                               |                     |
| <b>Alcohol intake</b>                       |                                              |                                          |                     |
| Never/Abstaining                            | 24.5 (2,108)                                 | (10.2) 491                               |                     |
| Infrequent drinkers                         | 66.8 (5,749)                                 | (76.2) 3655                              | <0.001              |
| Frequent drinkers                           | 8.7 (744)                                    | (13.5) 649                               |                     |
| <b>Prevalent diseases</b>                   |                                              |                                          |                     |
| Pulmonary disease <sup>b</sup>              | 16.2 (1,097)                                 | (9.9) 430                                | <0.001              |
| Coronary heart disease <sup>c</sup>         | 14.8 (1,281)                                 | (3.1) 149                                | <0.001              |
| Diabetes                                    | 4.3 (374)                                    | (0.5) 25                                 | <0.001              |
| Cancer                                      | 7.7 (517)                                    | (3.1) 132                                | <0.001              |
| Stroke                                      | 3.7 (318)                                    | (0.7) 33                                 | <0.001              |
| Ulcer                                       | 14.1 (908)                                   | (7.8) 333                                | <0.001              |
| <b>Comorbidity</b>                          | 9.9 (858)                                    | (2.3) 36                                 | <0.001              |
| <b>BMI categories</b>                       |                                              |                                          |                     |
| Underweight                                 | 1.7 (149)                                    | 0.5 (22)                                 |                     |
| Normal                                      | 40.0 (3,463)                                 | 44.9 (2,169)                             | <0.001              |
| Overweight                                  | 42.3 (3,659)                                 | 43.5 (2,094)                             |                     |
| Obesity                                     | 15.9 (1,378)                                 | 11.1 (533)                               |                     |
| <b>WC categories</b>                        |                                              |                                          |                     |
| Normal                                      | 39.0 (1,784)                                 | 45 (765)                                 |                     |
| Moderately high                             | 29.7 (1,356)                                 | 32.6 (554)                               | <0.001              |
| High                                        | 31.3 (1,434)                                 | 22.4 (381)                               |                     |

Values are percentage (number); P value:  $\chi^2$  test for categorical variables P value: <sup>a</sup>Student's t-test; <sup>b</sup>including asthma/chronic bronchitis/emphysema; <sup>c</sup>including angina pectoris/myocardial infarction. BMI, body mass index; WC, waist circumference.

**BMI categories**Underweight: <18.5 kg/m<sup>2</sup>Normal: 18.5–24.9 kg/m<sup>2</sup>Overweight: 25.0–29.9 kg/m<sup>2</sup>Obesity: ≥30 kg/m<sup>2</sup>**WC categories**

Normal: men ≤94 cm; women ≤80 cm

Moderately high: men 95–102 cm; women 81–88 cm

High: men &gt;102 cm; women &gt;88 cm

Supplementary Table 4 Cross-sectional association between BMI and WC, and pre-frailty/frailty: The Tromsø Study 2015–2016

|                              | Frailty status    |                            | Model 1           | Model 2           |
|------------------------------|-------------------|----------------------------|-------------------|-------------------|
|                              | Robust<br>(% (n)) | Pre-frail/frail<br>(% (n)) | OR (95% CI)       | OR (95% CI)       |
|                              | 70.5 (3179)       | 29.5 (1330)                |                   |                   |
| <b>BMI, kg/m<sup>2</sup></b> |                   |                            |                   |                   |
| Underweight                  | 0.5 (17)          | 1.4 (18)                   | 2.93 (1.48–5.83)  | 2.32 (1.09–4.94)  |
| Normal                       | 30.0 (951)        | 24.5 (323)                 | Ref.              | Ref.              |
| Overweight                   | 49.4 (1,566)      | 41.4 (547)                 | 1.07 (0.91–1.26)  | 1.03 (0.86–1.23)  |
| Obesity                      | 20.1 (639)        | 32.7 (432)                 | 2.14 (1.79–2.56)  | 1.88 (1.54–2.30)  |
| <b>WC, cm</b>                |                   |                            |                   |                   |
| Normal                       | 22.6 (716)        | 17.1 (225)                 | Ref.              | Ref.              |
| Moderately high              | 28.0 (888)        | 21.3 (281)                 | 1.02 (0.83–1.25)* | 1.01 (0.81–1.26)* |
| High                         | 49.4 (1,569)      | 61.6 (812)                 | 1.69 (1.42–2.01)* | 1.45 (1.20–1.76)* |

Model 1: minimally adjusted for age and sex (\*excluding sex) at Tromsø7.

Model 2: adjusted for age, sex, educational level, smoking status, alcohol intake, comorbidities, social support, and self-perceived health (\*excluding sex) at Tromsø7.

BMI, body mass index; CI, confidence interval; OR: odds ratio; WC, waist circumference.

**Supplementary Table 5 Longitudinal association between BMI and WC, combined profiles and trajectories, and pre-frailty/frailty: The Tromsø Study 1994–2016**

|                                        | Frailty status    |                                    | Model 1            | Model 2            |
|----------------------------------------|-------------------|------------------------------------|--------------------|--------------------|
|                                        | Robust<br>(%) (n) | Pre-frail/frail<br>(≥2)<br>(%) (n) | OR (95% CI)        | OR (95% CI)        |
| <b>BMI, kg/m<sup>2</sup></b>           | n= 2925           | n= 1125                            |                    |                    |
| Underweight                            | 0.4 (10)          | 0.7 (8)                            | 2.28 (0.89–5.88)   | 1.37 (0.49–3.89)   |
| Normal                                 | 48.0 (1404)       | 40.1 (451)                         | Ref.               | Ref.               |
| Overweight                             | 43.0 (1259)       | 41.7 (469)                         | 1.16 (0.99–1.36)   | 1.16 (0.99–1.36)   |
| Obesity                                | 8.6 (252)         | 17.5 (197)                         | 2.38 (1.92–2.95)   | 2.31 (1.83–2.92)   |
| <b>WC, cm</b>                          | n= 714            | n = 387                            |                    |                    |
| Normal                                 | 51.5 (368)        | 39.0 (151)                         | Ref.               | Ref.               |
| Moderately high                        | 31.1 (222)        | 33.1 (128)                         | 1.40 (1.05–1.87)*  | 1.50 (1.10–2.05)*  |
| High                                   | 17.4 (124)        | 27.9 (108)                         | 2.10 (1.52–2.89)*  | 2.19 (1.54–3.14)*  |
| <b>BMI and WC profile, baseline</b>    | n= 650            | n = 347                            |                    |                    |
| Normal BMI and normal WC               | 36.6 (238)        | 30.8 (107)                         | Ref.               | Ref.               |
| Normal BMI and moderately high/high WC | 8.0 (52)          | 6.4 (22)                           | 0.94 (0.54–1.63)*  | 0.92 (0.50–1.66)   |
| Overweight and normal WC               | 15.4 (100)        | 9.2 (32)                           | 0.73 (0.46– 1.15)* | 0.74 (0.45– 1.20)  |
| Overweight and moderately high/high WC | 32.0 (208)        | 34.9 (121)                         | 1.31 (0.95– 1.81)* | 1.47 (1.04–2.08)   |
| Obesity and moderately high/high WC    | 8.0 (52)          | 18.7 (65)                          | 2.73 (1.77– 4.20)* | 2.91 (1.83–4.65)   |
| <b>BMI trajectories</b>                | n= 653            | n = 348                            |                    |                    |
| Stable normal BMI                      | 26.9 (176)        | 22.1 (77)                          | Ref.               | Ref.               |
| Stable overweight                      | 46.6 (304)        | 41.1 (143)                         | 1.16 (0.83–1.63)   | 1.14 (0.79–1.63)   |
| Overweight to obese                    | 22.4 (146)        | 25.9 (90)                          | 1.53 (1.04–2.24)   | 1.55 (1.02–2.35)   |
| Increasing obesity                     | 4.1 (27)          | 10.9 (38)                          | 3.35 (1.90–5.90)   | 3.17 (1.72–5.85)   |
| <b>WC trajectories (women)</b>         | n= 287            | n = 172                            |                    |                    |
| Normal to moderately high WC           | 25.5 (73)         | 20.4 (35)                          | Ref.               | Ref.               |
| Moderately high to high WC             | 50.5 (145)        | 38.9 (67)                          | 0.98 (0.60–1.62)*  | 1.12 (0.65–1.93)*  |
| Gradually increasing high WC           | 20.9 (60)         | 33.7 (58)                          | 1.99 (1.15–3.43)*  | 2.02 (1.10–3.71)   |
| Steeply increasing high WC             | 3.1 (9)           | 7.0 (12)                           | 2.63 (1.01–6.86)*  | 3.30 (1.09–10.04)* |
| <b>WC trajectories (men)</b>           | n= 366            | n = 176                            |                    |                    |
| Normal WC                              | 21.6 (79)         | 17.6 (31)                          | Ref.               | Ref.               |
| Stable moderately high WC              | 41.5 (152)        | 36.4 (64)                          | 1.09 (0.66–1.81)*  | 1.03 (0.60–1.76)*  |
| Moderately high to high WC             | 32.2 (118)        | 29.6 (52)                          | 1.17 (0.69–1.99)*  | 1.06 (0.60–1.87)*  |
| Increasing high WC                     | 4.6 (17)          | 16.5 (29)                          | 4.51 (2.17–9.38)*  | 4.36 (1.94–9.80)*  |

# Analysis was restricted to individuals who were <60 years at Tromsø4

Model 1: adjusted for age and sex (\*excluding sex) at baseline.

Model 2: adjusted for age, sex, educational level, marital/cohabitation status, smoking status, alcohol intake, social support, self-perceived health, and physical activity level (\*excluding sex) at baseline.

BMI, body mass index; CI, confidence interval; OR, odds ratio; WC, waist circumference.

**Supplementary Table 6 Longitudinal association between BMI and WC, combined profiles and trajectories, and pre-frailty/frailty (frailty score  $\geq 2$ ): The Tromsø Study 1994–2016**

|                                        | Frailty status    |                                            | Model 1           | Model 2           |
|----------------------------------------|-------------------|--------------------------------------------|-------------------|-------------------|
|                                        | Robust<br>(%) (n) | Pre-frail/frail<br>( $\geq 2$ )<br>(%) (n) | OR (95% CI)       | OR (95% CI)       |
| <b>BMI, kg/m<sup>2</sup></b>           | n= 2925           | n= 199                                     |                   |                   |
| Underweight                            | 0.4 (10)          | 0.5 (1)                                    | 1.45 (0.18–11.98) | 0.95 (0.11–7.85)  |
| Normal                                 | 48.0 (1404)       | 37.7 (75)                                  | Ref.              | Ref.              |
| Overweight                             | 43.0 (1259)       | 38.7 (77)                                  | 1.22 (0.87–1.71)  | 1.18 (0.82–1.71)  |
| Obesity                                | 8.6 (252)         | 23.1 (46)                                  | 3.47 (2.33–5.18)  | 3.27 (2.09–5.08)  |
| <b>WC, cm</b>                          | n= 714            | n = 88                                     |                   |                   |
| Normal                                 | 51.5 (368)        | 30.7 (27)                                  | Ref.              | Ref.              |
| Moderately high                        | 31.1 (222)        | 36.4 (32)                                  | 1.97 (1.15–3.38)* | 1.98 (1.10–3.54)* |
| High                                   | 17.4 (124)        | 32.9 (29)                                  | 3.20 (1.82–5.64)* | 3.18 (1.71–5.93)* |
| <b>BMI and WC profile, baseline</b>    | n= 650            | n = 81                                     |                   |                   |
| Normal BMI and normal WC               | 36.6 (238)        | 27.2 (22)                                  | Ref.              | Ref.              |
| Normal BMI and moderately high/high WC | 8.0 (52)          | 8.6 (7)                                    | 1.45 (0.59–3.59)  | 1.41 (0.52–3.86)  |
| Overweight and normal WC               | 15.4 (100)        | 3.7 (3)                                    | 0.33 (0.09– 1.13) | 0.37 (0.11– 1.31) |
| Overweight and moderately high/high WC | 32.0 (208)        | 38.3 (31)                                  | 1.65 (0.92–2.95)  | 1.81 (0.97–3.38)  |
| Obesity and moderately high/high WC    | 8.0 (52)          | 22.2 (18)                                  | 3.79 (1.89– 7.62) | 3.66 (1.71–7.81)  |

#Analysis was restricted to individuals who were <60 years at Tromsø4 and had frailty score  $\geq 2$

Model 1: adjusted for age and sex (\*excluding sex) at baseline.

Model 2: adjusted for age, sex, educational level, marital/cohabitation status, smoking status, alcohol intake, social support, self-perceived health, and physical activity level (\*excluding sex) at baseline.

BMI, body mass index; CI, confidence interval; OR, odds ratio; WC, waist circumference.

**Supplementary Table 7 Longitudinal association between BMI and WC, and pre-frailty/frailty among individuals with information on all five frailty criteria: The Tromsø Study 1994–2016**

|                              | Frailty status    |                            | Model 1           | Model 2           |
|------------------------------|-------------------|----------------------------|-------------------|-------------------|
|                              | Robust<br>(%) (n) | Pre-frail/frail<br>(%) (n) | OR (95% CI)       | OR (95% CI)       |
|                              | 70.4% (2016)      | 29.6% (848)                |                   |                   |
| <b>BMI, kg/m<sup>2</sup></b> |                   |                            |                   |                   |
| Underweight                  | 0.4 (8)           | 0.7 (6)                    | 1.98 (0.67–5.84)  | 0.97 (0.28–3.23)  |
| Normal                       | 48.4 (976)        | 40.1 (340)                 | Ref.              | Ref.              |
| Overweight                   | 42.8 (862)        | 42.9 (364)                 | 1.19 (0.99–1.42)  | 1.18 (0.97–1.43)  |
| Obesity                      | 8.4 (170)         | 16.3 (168)                 | 2.36 (1.82–3.05)  | 2.28 (1.72–3.01)  |
| <b>WC, cm</b>                | n = 600           | n = 350                    |                   |                   |
| Normal                       | 53.3 (320)        | 40.9 (143)                 | Ref.              | Ref.              |
| Moderately high              | 31.3 (188)        | 34.0 (119)                 | 1.40 (1.03–1.90)* | 1.50 (1.08–2.08)* |
| High                         | 15.3 (92)         | 25.1 (88)                  | 2.15 (1.51–3.08)* | 2.15 (1.46–3.18)* |

Model 1: adjusted for age and sex (\*excluding sex) at baseline.

Model 2: adjusted for age, sex, educational level, marital/cohabitation status, smoking status, alcohol intake, social support, self-perceived health, and physical activity level (\*excluding sex) at baseline.

BMI, body mass index; CI, confidence interval; OR, odds ratio; WC, waist circumference.

Supplementary Table 8 Longitudinal association between BMI and WC, and frailty components: The Tromsø Study 1994–2016

|                                  | Model 1<br>OR (95% CI) | Model 2<br>OR (95% CI) |
|----------------------------------|------------------------|------------------------|
| <b>Low grip strength</b>         |                        |                        |
| <b>BMI, kg/m<sup>2</sup></b>     |                        |                        |
| Underweight                      | 0.85 (0.11–6.63)       | 0.78 (0.10–6.17)       |
| Normal                           | Ref.                   | Ref.                   |
| Overweight                       | 1.45 (1.05–2.00)       | 1.34 (0.95–1.89)       |
| Obesity                          | 2.00 (1.31–3.05)       | 1.52 (0.95–2.43)       |
| <b>WC, cm</b>                    |                        |                        |
| Normal                           | Ref.                   | Ref.                   |
| Moderately high                  | 0.99 (0.58–1.68)*      | 0.92 (0.51–1.65)*      |
| High                             | 1.40 (0.81–2.43)*      | 1.37 (0.75–2.50)*      |
| <b>Low walking speed</b>         |                        |                        |
| <b>BMI, kg/m<sup>2</sup></b>     |                        |                        |
| Underweight                      | 4.51 (1.20–16.95)      | 3.03 (0.64–14.35)      |
| Normal                           | Ref.                   | Ref.                   |
| Overweight                       | 1.63 (1.12–2.37)       | 1.67 (1.12–2.48)       |
| Obesity                          | 3.32 (2.13–5.16)       | 3.15 (1.96–5.07)       |
| <b>WC, cm</b>                    |                        |                        |
| Normal                           | Ref.                   | Ref.                   |
| Moderately high                  | 2.24 (1.27–3.94)*      | 2.52 (1.38–4.63)*      |
| High                             | 2.65 (1.45–4.85)*      | 2.35 (1.19–5.63)*      |
| <b>Exhaustion</b>                |                        |                        |
| <b>BMI, kg/m<sup>2</sup></b>     |                        |                        |
| Underweight                      | 1.72 (0.22–13.18)      | 1.62 (0.20–13.24)      |
| Normal                           | Ref.                   | Ref.                   |
| Overweight                       | 1.11 (0.74–1.65)       | 1.06 (0.69–1.64)       |
| Obesity                          | 1.39 (0.793–2.42)      | 1.25 (0.69–2.27)       |
| <b>WC, cm</b>                    |                        |                        |
| Normal                           | Ref.                   | Ref.                   |
| Moderately high                  | 1.67 (0.75–3.72)*      | 1.67 (0.72–3.89)*      |
| High                             | 1.74 (0.72–4.20)*      | 1.69 (0.66–4.29)*      |
| <b>Unintentional weight loss</b> |                        |                        |
| <b>BMI, kg/m<sup>2</sup></b>     |                        |                        |
| Underweight                      | 2.84 (0.92–8.79)       | 2.15 (0.60–7.76)       |
| Normal                           | Ref.                   | Ref.                   |
| Overweight                       | 0.63 (0.49–0.82)       | 0.64 (0.49–0.85)       |
| Obesity                          | 0.68 (0.45–1.03)       | 0.70 (0.46–1.08)       |
| <b>WC, cm</b>                    |                        |                        |
| Normal                           | Ref.                   | Ref.                   |
| Moderately high                  | 0.99 (0.64–1.55)*      | 1.10 (0.70–1.73)*      |
| High                             | 0.57 (0.57–1.03)*      | 0.56 (0.30–1.07)*      |
| <b>Low physical activity</b>     |                        |                        |
| <b>BMI, kg/m<sup>2</sup></b>     |                        |                        |
| Underweight                      | –                      | –                      |
| Normal                           | Ref.                   | Ref.                   |
| Overweight                       | 1.42 (1.16–1.74)       | 1.43 (1.15–1.79)       |
| Obesity                          | 3.62 (2.81–4.68)       | 3.71 (2.80–4.90)       |
| <b>WC, cm</b>                    |                        |                        |
| Normal                           | Ref.                   | Ref.                   |
| Moderately high                  | 1.85 (1.24–2.78)*      | 1.71 (1.10–2.66)*      |
| High                             | 4.47 (2.97–6.72)*      | 4.94 (3.15–7.76)*      |

# Analysis was restricted to individuals who were <60 years at Tromsø4

Model 1: adjusted for age and sex (\*excluding sex) at baseline.

Model 2: adjusted for age, sex, educational level, marital/cohabitation status, smoking status, alcohol intake, social support, self-perceived health, and physical activity level (\*excluding sex) at baseline.

BMI, body mass index; CI, confidence interval; OR, odds ratio; WC, waist circumference.

1  
2  
3  
4  
5  
6  
7  
8  
9  
10  
11  
12  
13  
14  
15  
16  
17  
18  
19  
20  
21  
22  
23  
24  
25  
26  
27  
28  
29  
30  
31  
32  
33  
34  
35  
36  
37  
38  
39  
40  
41  
42  
43  
44  
45  
46  
47  
48  
49  
50  
51  
52  
53  
54  
55  
56  
57  
58  
59  
60

**SUPPLEMENTARY FIGURES**

For peer review only



Supplementary Figure 1 Trajectories of individuals with repeated body mass index measurements between Tromsø4 and Tromsø7: The Tromsø Study 1994–2016.

(n = 1,391)



|         |                       |       |
|---------|-----------------------|-------|
| Group 1 | Stable normal weight  | 25.8% |
| Group 2 | Stable overweight     | 44.8% |
| Group 3 | Overweight to obesity | 23.9% |
| Group 4 | Increasing obesity    | 5.5%  |

Supplementary Figure 2 Trajectories of individuals with repeated waist circumference measurements between Tromsø4 and Tromsø7: The Tromsø Study 1994–2016.

(Males: n = 731; females n = 660)

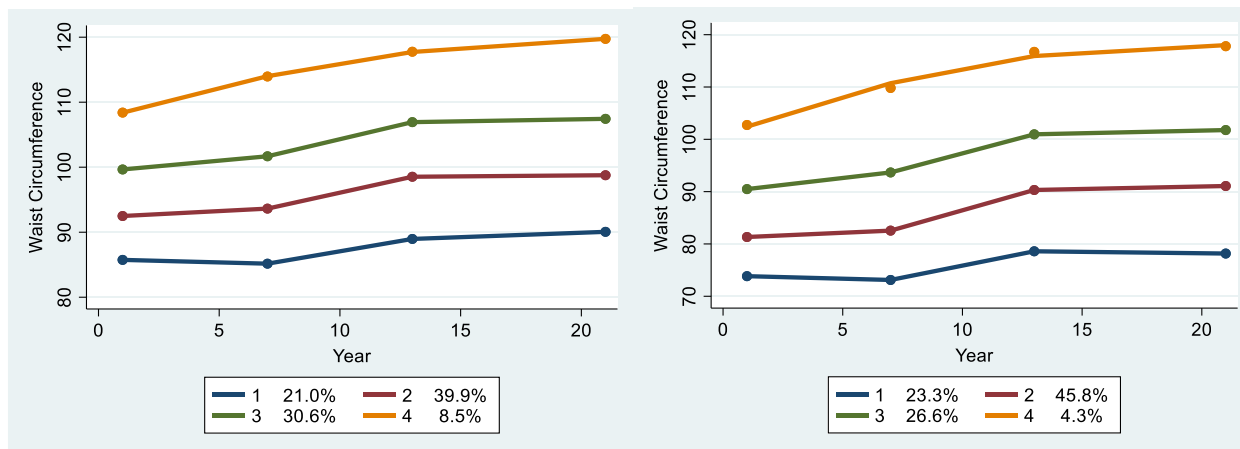

| Male    |                            |        |
|---------|----------------------------|--------|
| Group 1 | Stable normal WC           | 21.00% |
| Group 2 | Stable moderately high WC  | 39.90% |
| Group 3 | Moderately high to high WC | 30.60% |
| Group 4 | Increasing high WC         | 8.5 %  |

| Female  |                              |        |
|---------|------------------------------|--------|
| Group 1 | Stable normal WC             | 23.30% |
| Group 2 | Moderately high to high WC   | 45.80% |
| Group 3 | Gradually increasing high WC | 26.60% |
| Group 4 | Steeply increasing high WC   | 4.30%  |

## Research checklist

|                              | Item No | Content covered                                                                                                                                                                                                                                                                                                        | Page No   |
|------------------------------|---------|------------------------------------------------------------------------------------------------------------------------------------------------------------------------------------------------------------------------------------------------------------------------------------------------------------------------|-----------|
| <b>Title and abstract</b>    | 1       | (a) Indicate the study's design with a commonly used term in the title or the abstract<br>(b) Provide in the abstract an informative and balanced summary of what was done and what was found                                                                                                                          | √ (1-2)   |
| <b>Introduction</b>          |         |                                                                                                                                                                                                                                                                                                                        |           |
| Background/rationale         | 2       | Explain the scientific background and rationale for the investigation being reported                                                                                                                                                                                                                                   | √ (3)     |
| Objectives                   | 3       | State specific objectives, including any pre-specified hypotheses                                                                                                                                                                                                                                                      | √ (3)     |
| <b>Methods</b>               |         |                                                                                                                                                                                                                                                                                                                        |           |
| Study design                 | 4       | Present key elements of study design early in the paper                                                                                                                                                                                                                                                                | √ (4)     |
| Setting                      | 5       | Describe the setting, locations, and relevant dates, including periods of recruitment, exposure, follow-up, and data collection                                                                                                                                                                                        | √ (4)     |
| Participants                 | 6       | (a) Give the eligibility criteria, and the sources and methods of selection of participants. Describe methods of follow-up<br>(b) For matched studies, give matching criteria and number of exposed and unexposed<br>(c) Flow chart explaining inclusion and exclusion of participants                                 | √ (4)     |
| Variables                    | 7       | Clearly define all outcomes, exposures, predictors, potential confounders, and effect modifiers. Give diagnostic criteria, if applicable                                                                                                                                                                               | √ (4,5,6) |
| Data sources/<br>measurement | 8       | For each variable of interest, give sources of data and details of methods of assessment (measurement). Describe comparability of assessment methods if there is more than one group                                                                                                                                   | √ (4,5)   |
| Bias                         | 9       | Describe any efforts to address potential sources of bias                                                                                                                                                                                                                                                              | √ (6)     |
| Study size                   | 10      | Explain how the study size was arrived at                                                                                                                                                                                                                                                                              | √ (4)     |
| Quantitative variables       | 11      | Explain how quantitative variables were handled in the analyses. If applicable, describe which groupings were chosen and why                                                                                                                                                                                           | √ (4,5,6) |
| Statistical methods          | 12      | (a) Describe all statistical methods, including those used to control for confounding<br>(b) Describe any methods used to examine subgroups and interactions<br>(c) Explain how missing data were addressed<br>(d) If applicable, explain how loss to follow-up was addressed<br>(e) Describe any sensitivity analyses | √ (6)     |
| <b>Results</b>               |         |                                                                                                                                                                                                                                                                                                                        |           |
| Participants                 | 13      | (a) Information on participants                                                                                                                                                                                                                                                                                        | √ (4)     |
| Descriptive data             | 14      | (a) Give characteristics of study participants (eg demographic, clinical, social) and information on exposures and potential confounders<br>(b) Indicate number of participants with missing data for each variable of interest<br>(c) Summarise follow-up time (eg, average and total amount)                         | √ (7, 8)  |
| Outcome data                 | 15      | Report numbers of outcome events or summary measures over time                                                                                                                                                                                                                                                         | √ (8-11)  |

|    |                          |    |                                                                                                                                                                                                              |           |
|----|--------------------------|----|--------------------------------------------------------------------------------------------------------------------------------------------------------------------------------------------------------------|-----------|
| 1  | Main results             | 16 | (a) Give unadjusted estimates and, if applicable, confounder-adjusted estimates and their precision (eg, 95% confidence interval). Make clear which confounders were adjusted for and why they were included | √ (9-11)  |
| 2  |                          |    | (b) Report category boundaries when continuous variables were categorized                                                                                                                                    |           |
| 3  |                          |    | (c) If relevant, consider translating estimates of relative risk into absolute risk for a meaningful time period                                                                                             |           |
| 4  |                          |    |                                                                                                                                                                                                              |           |
| 5  |                          |    |                                                                                                                                                                                                              |           |
| 6  |                          |    |                                                                                                                                                                                                              |           |
| 7  |                          |    |                                                                                                                                                                                                              |           |
| 8  |                          |    |                                                                                                                                                                                                              |           |
| 9  | Other analyses           | 17 | Report other analyses done—eg analyses of subgroups and interactions, and sensitivity analyses                                                                                                               | √ (9-11)  |
| 10 |                          |    |                                                                                                                                                                                                              |           |
| 11 | <b>Discussion</b>        |    |                                                                                                                                                                                                              |           |
| 12 |                          |    |                                                                                                                                                                                                              |           |
| 13 | Key results              | 18 | Summarise key results with reference to study objectives                                                                                                                                                     | √ (11)    |
| 14 | Limitations              | 19 | Discuss limitations of the study, taking into account sources of potential bias or imprecision. Discuss both direction and magnitude of any potential bias                                                   | √ (13)    |
| 15 |                          |    |                                                                                                                                                                                                              |           |
| 16 | Interpretation           | 20 | Give a cautious overall interpretation of results considering objectives, limitations, multiplicity of analyses, results from similar studies, and other relevant evidence                                   | √ (11-14) |
| 17 |                          |    |                                                                                                                                                                                                              |           |
| 18 |                          |    |                                                                                                                                                                                                              |           |
| 19 | Generalisability         | 21 | Discuss the generalisability (external validity) of the study results                                                                                                                                        | √ (13-14) |
| 20 |                          |    |                                                                                                                                                                                                              |           |
| 21 | <b>Other information</b> |    |                                                                                                                                                                                                              |           |
| 22 | Funding                  | 22 | Give the source of funding and the role of the funders for the present study and, if applicable, for the original study on which the present article is based                                                | √ (15)    |
| 23 |                          |    |                                                                                                                                                                                                              |           |
| 24 |                          |    |                                                                                                                                                                                                              |           |
| 25 |                          |    |                                                                                                                                                                                                              |           |
| 26 |                          |    |                                                                                                                                                                                                              |           |
| 27 |                          |    |                                                                                                                                                                                                              |           |
| 28 |                          |    |                                                                                                                                                                                                              |           |
| 29 |                          |    |                                                                                                                                                                                                              |           |
| 30 |                          |    |                                                                                                                                                                                                              |           |
| 31 |                          |    |                                                                                                                                                                                                              |           |
| 32 |                          |    |                                                                                                                                                                                                              |           |
| 33 |                          |    |                                                                                                                                                                                                              |           |
| 34 |                          |    |                                                                                                                                                                                                              |           |
| 35 |                          |    |                                                                                                                                                                                                              |           |
| 36 |                          |    |                                                                                                                                                                                                              |           |
| 37 |                          |    |                                                                                                                                                                                                              |           |
| 38 |                          |    |                                                                                                                                                                                                              |           |
| 39 |                          |    |                                                                                                                                                                                                              |           |
| 40 |                          |    |                                                                                                                                                                                                              |           |
| 41 |                          |    |                                                                                                                                                                                                              |           |
| 42 |                          |    |                                                                                                                                                                                                              |           |
| 43 |                          |    |                                                                                                                                                                                                              |           |
| 44 |                          |    |                                                                                                                                                                                                              |           |
| 45 |                          |    |                                                                                                                                                                                                              |           |
| 46 |                          |    |                                                                                                                                                                                                              |           |
| 47 |                          |    |                                                                                                                                                                                                              |           |
| 48 |                          |    |                                                                                                                                                                                                              |           |
| 49 |                          |    |                                                                                                                                                                                                              |           |
| 50 |                          |    |                                                                                                                                                                                                              |           |
| 51 |                          |    |                                                                                                                                                                                                              |           |
| 52 |                          |    |                                                                                                                                                                                                              |           |
| 53 |                          |    |                                                                                                                                                                                                              |           |
| 54 |                          |    |                                                                                                                                                                                                              |           |
| 55 |                          |    |                                                                                                                                                                                                              |           |
| 56 |                          |    |                                                                                                                                                                                                              |           |
| 57 |                          |    |                                                                                                                                                                                                              |           |
| 58 |                          |    |                                                                                                                                                                                                              |           |
| 59 |                          |    |                                                                                                                                                                                                              |           |
| 60 |                          |    |                                                                                                                                                                                                              |           |
